# Supplementary material for: Profile of Bacterial Infections in COVID-19 Patients: Antimicrobial Resistance in the Time of SARS-CoV-2
Source: Biology (Basel). 2021 Aug 24;10(9):822. doi: 10.3390/biology10090822 (PMC8467430; doi:10.3390/biology10090822)
Supplement: Supplementary file 1 [file biology-10-00822-s001.zip]

Archive with 8 entries (8 files):
- Supplementary_information.pdf
- Supplementary_tableS1.xlsx
- Supplementary_tableS2.xlsx
- Supplementary_tableS3.xlsx
- Supplementary_tableS4.xlsx
- Supplementary_tableS5.xlsx
- Supplementary_tableS6.xlsx
- Supplementary_tableS7.xlsx
