# Supplementary material for: Profile of Bacterial Infections in COVID-19 Patients: Antimicrobial Resistance in the Time of SARS-CoV-2
Source: Biology (Basel). 2021 Aug 24;10(9):822. doi: 10.3390/biology10090822 (PMC8467430; doi:10.3390/biology10090822)
Supplement: Supplementary file 1 [file biology-10-00822-s001.zip › Supplementary_tableS1.xlsx]

## Sheet: README
Supplementary Table 1
details on the clinical bacterial isolates analyzed over this study
Column ID	description
ID_byORDER	arbitrary number assigned to the isolates according to the time of isolation (e.g.:1= the first strain isolated and included in the study)
Date	Date of hospitalization of the patient (mm/dd/yy)
Month	Month of hospitalization of the patient
Year	Year of hospitalization of the patient
Ward	name of the ward where the patient was hospitalized
clinical_area	cathegory of ward
COVID	COVID status of the patient (positive if the patient was tested positive for COVID infection at the time of isolation of the microorganism, negative if the patient was tested negative for COVID infection at the time of isolation of the microorganism)
Specimen	isolation source
Microorganism	microbial species, genus, or group to which the isolate belongs
An	Amikacin	Response of the isolate to the respective antibiotic, defined according to the EUCAST clinical breakpoints. S= Susceptible, I= Intermediate, R= Resistant. If empty, the isolate response was not tested against the indicated antibiotic
Azt	Aztreonam
Fep	Cefepime
Ctx	Cefotaxime
Caz	Ceftazidime
Cro	Ceftriaxone
Ipm	Imipenem
Lvx	Levofloxacin
Mem	Meropenem
Nor	Norfloxacin
Pip	Piperacillin
Pta	Piperacillin-tazobactam
Te	Tetracycline
Sxt	Trimethoprim/sulfamethoxazole
Gm	Gentamicin
Cl	Colistin
Cip	Ciprofloxacin
c	Chloramphenicol

## Sheet: database_isolates
ID_byORDER	Date	Month	Year	Ward	clinical_area	COVID	Specimen	Microorganism	An	Azt	Fep	Ctx	Caz	Cro	Ipm	Lvx	Mem	Nor	Pip	Pta	Te	Sxt	Gm	Cl	Cip	c
115	4/23/2020	April	2020	Cardiology	cardiology	negative	catheter_urine	Escherichia coli	S		S	S	S		S	S	S		S	S		S	S		S
247	5/2/2020	May	2020	Cardiology	cardiology	negative	urine	Enterococcus faecalis							S							R			R
248	5/2/2020	May	2020	Cardiology	cardiology	negative	urine	Pseudomonas aeruginosa			S		S		S		S			S			S		S
372	6/12/2020	June	2020	Cardiology	cardiology	negative	catheter_urine	Escherichia coli	S		S	S	S		S	S	S		S	S		S	S		S
383	6/16/2020	June	2020	Cardiology	cardiology	negative	blood	Escherichia coli	S		S	S	S		S	R	S		S	S		S	S		R
384	6/16/2020	June	2020	Cardiology	cardiology	negative	urine	Citrobacter koseri			S	S	S		S		S			S		S	S		S
413	6/24/2020	June	2020	Cardiology	cardiology	negative	blood	Staphylococcus aureus													S	S	S		S
430	6/27/2020	June	2020	Cardiology	cardiology	negative	blood	Staphylococcus epidermidis													S	S	S		S
471	6/7/2020	June	2020	Cardiology	cardiology	negative	catheter_urine	Escherichia coli	S		S	S	S		S	S	S		S	S		S	S		S
527	7/17/2020	July	2020	Cardiology	cardiology	negative	urine	Enterococcus faecium							R							R			R
786	8/2/2020	August	2020	Cardiology	cardiology	negative	urine	Klebsiella pneumoniae spp pneumoniae			R	R	R		S		S			S		R	S		I
795	8/20/2020	August	2020	Cardiology	cardiology	negative	sputum	Pseudomonas aeruginosa	S		S		S		S	S	S		S	S			S		S
796	8/20/2020	August	2020	Cardiology	cardiology	negative	sputum	Klebsiella pneumoniae spp pneumoniae	S		S	S	S		S	S	S		S	S		S	S		S
815	8/23/2020	August	2020	Cardiology	cardiology	negative	catheter_urine	Escherichia coli	S		S	S	S		S	S	S		S	S		S	S		S
897	8/8/2020	August	2020	Cardiology	cardiology	negative	blood	Staphylococcus aureus													S	S	S		S
898	8/8/2020	August	2020	Cardiology	cardiology	negative	urine	Staphylococcus haemolyticus													S	S	S		S
899	8/8/2020	August	2020	Cardiology	cardiology	negative	catheter_urine	Klebsiella pneumoniae spp pneumoniae	S		R	R	R		S	S	S		R	S		R	S		I
922	9/10/2020	September	2020	Cardiology	cardiology	negative	catheter_urine	Escherichia coli	I		R	R	R		S	R	S		R	R		R	S		R
948	9/16/2020	September	2020	Cardiology	cardiology	negative	sputum	Klebsiella pneumoniae spp pneumoniae	S		R		R	R	R	R	I			R		S	R		R
949	9/16/2020	September	2020	Cardiology	cardiology	negative	blood	Staphylococcus aureus													S	S	S		R
950	9/16/2020	September	2020	Cardiology	cardiology	negative	catheter_urine	Escherichia coli	S		S	S	S		S	S	S		S	S		S	S		S
961	9/17/2020	September	2020	Cardiology	cardiology	negative	catheter_urine	Klebsiella pneumoniae spp pneumoniae	S		S	S	S		S	R	S		S	S		S	S		R
1005	9/22/2020	September	2020	Cardiology	cardiology	negative	blood	Streptococcus dysgalactiae spp. equisimilis								S					S					S
1073	9/3/2020	September	2020	Cardiology	cardiology	negative	catheter_urine	Achromobacter spp.	R		R		R		S	R			S	S			R		R
1107	9/6/2020	September	2020	Cardiology	cardiology	negative	urine	Escherichia coli			S	S	S		S		S			R		S	S		S
1112	9/7/2020	September	2020	Cardiology	cardiology	negative	blood	Enterococcus hirae							S							R
1113	9/7/2020	September	2020	Cardiology	cardiology	negative	blood	Klebsiella oxytoca	S		S	S	S		S	S	S		S	S		S	S		S
1141	10/1/2020	October	2020	Cardiology	cardiology	negative	pus	Staphylococcus aureus								R					S	S	S		R
1156	10/10/2020	October	2020	Cardiology	cardiology	negative	urine	Enterobacter amnigenus biogroup 2	S	S	S	S	I		S	S	S		S	S	R	S	S	S	S
1165	10/12/2020	October	2020	Cardiology	cardiology	negative	urine	Escherichia coli	S	S	S	S	S		S	S	S		R	S		S	S	S	S
1220	10/19/2020	October	2020	Cardiology	cardiology	negative	blood	Klebsiella pneumoniae	S	R	R	R	R		S	S	S			R		R	S		S
1264	10/24/2020	October	2020	Cardiology	cardiology	negative	urine	Pseudomonas aeruginosa	S	I	S	R	S		S	S	S		S	S	R	R	S	S	S	R
1270	10/25/2020	October	2020	Cardiology	cardiology	negative	urine	Escherichia coli	S	S	S	S	S		S	S	S		S	S	R	S	S	S	S
1298	10/31/2020	October	2020	Cardiology	cardiology	positive	blood	Klebsiella pneumoniae	S	S	S	S	S		S	S	S			R		R	S		S
1299	10/31/2020	October	2020	Cardiology	cardiology	positive	urine	Klebsiella oxytoca	I	I	I	R	I		R	R	S		R	S	R	R	R	R	S
1322	10/8/2020	October	2020	Cardiology	cardiology	negative	blood	Staphylococcus aureus								S							S		S
1323	10/8/2020	October	2020	Cardiology	cardiology	negative	urine	Escherichia coli	S	S	S	I	S		S	R	S		S	S	R	I	S	S	R
1405	11/20/2020	November	2020	Cardiology	cardiology	negative	urine	Citrobacter koseri	S		S	S	S		S	S		S		S		S	S	S	S
1420	11/23/2020	November	2020	Cardiology	cardiology	negative	blood	Staphylococcus haemolyticus								R					R	R	R		R
1421	11/23/2020	November	2020	Cardiology	cardiology	negative	blood	Klebsiella pneumoniae	S	S	S	S	S		S	S	S			S		S	S		S
1613	12/17/2020	December	2020	Cardiology	cardiology	negative	blood	Staphylococcus aureus								S					S	S	S		S
1663	12/23/2020	December	2020	Cardiology	cardiology	negative	urine	Proteus mirabilis	I		S	I	S		S	S		R		S		S	S	R	R
1800	1/11/2021	January	2021	Cardiology	cardiology	negative	urine	Escherichia coli	S		S	S	S		S	S		S		S		S	S	S	S
1801	1/11/2021	January	2021	Cardiology	cardiology	negative	urine	Klebsiella pneumoniae	S		R	R	R		S	R		R		S		R	S	S	R
1802	1/11/2021	January	2021	Cardiology	cardiology	negative	urine	Escherichia coli	S		S	S	S		S	S		I		S		R	S	S	S
1942	1/29/2021	January	2021	Cardiology	cardiology	negative	catheter_urine	Proteus mirabilis	I	S	I	S	S		I	S	S		R	S		R	S	R	R
1973	1/7/2021	January	2021	Cardiology	cardiology	negative	urine	Escherichia coli	S		S	S	S		S	S		R		S		R	S	S	S
764	8/17/2020	August	2020	Cardiology – Intensive care	cardiology	negative	urine	Escherichia coli			S	S	S		S		S			S		S	S		S
907	8/9/2020	August	2020	Cardiology – Intensive care	cardiology	negative	catheter_urine	Citrobacter freundii			S	S	S		S		S			S		S	S		S
1108	9/6/2020	September	2020	Cardiology – Intensive care	cardiology	negative	catheter_urine	Escherichia coli	S		S	S	S		S	S	S		R	S		R	S		S
11	3/28/2020	March	2020	ER	ER	negative	urine	Enterococcus faecalis							S							R			S
29	4/1/2020	April	2020	ER	ER	positive	blood	Staphylococcus hominis													I	R	S		S
33	4/10/2020	April	2020	ER	ER	negative	urine	Escherichia coli			S	S	S		S		S			S		S	S		S
41	4/11/2020	April	2020	ER	ER	negative	blood	Staphylococcus epidermidis													S	I	R		R
44	4/12/2020	April	2020	ER	ER	negative	blood	Escherichia coli	S		S	S	S		S	S	S		S	S		S	S		S
50	4/13/2020	April	2020	ER	ER	negative	blood	Escherichia coli	S		S	S	S		S	S	S		S	S		S	S		S
51	4/13/2020	April	2020	ER	ER	negative	urine	Escherichia coli			S	S	S		S		S			S		S	S		S
59	4/14/2020	April	2020	ER	ER	negative	blood	Staphylococcus epidermidis													I	S	R		R
81	4/17/2020	April	2020	ER	ER	negative	catheter_urine	Escherichia coli	S		S	S	S		S	S	S		R	S		R	S		S
86	4/18/2020	April	2020	ER	ER	negative	blood	Escherichia coli	I		R	R	R		S	R	S		R	S		S	S		R
88	4/19/2020	April	2020	ER	ER	negative	urine	Escherichia coli			R	R	R		S		S			R		R	S		R
92	4/2/2020	April	2020	ER	ER	negative	catheter_urine	Escherichia coli			S	S	S		S		S			S		S	I		S
116	4/23/2020	April	2020	ER	ER	negative	catheter_urine	Klebsiella pneumoniae spp pneumoniae	S		R	R	R		R	S	R		R	S		R	S		I
121	4/24/2020	April	2020	ER	ER	negative	blood	Staphylococcus epidermidis													S	I	R		R
122	4/24/2020	April	2020	ER	ER	negative	urine	Escherichia coli			S	S	S		S		S			S		R	S		S
123	4/24/2020	April	2020	ER	ER	negative	catheter_urine	Escherichia coli	S		I	R	R		S	R	S		R	S		R	S		R
129	4/25/2020	April	2020	ER	ER	negative	catheter_urine	Enterococcus faecalis							S							R			S
130	4/25/2020	April	2020	ER	ER	negative	catheter_urine	Escherichia coli			S	S	S		S		S			S		S	S		R
137	4/27/2020	April	2020	ER	ER	negative	urine	Escherichia coli			R	R	R		S		S			S		R	R		S
138	4/27/2020	April	2020	ER	ER	negative	catheter_urine	Escherichia coli	S		R	R	R		S	R	S		R	S		R	R		R
143	4/28/2020	April	2020	ER	ER	negative	bronchus_lavage	Klebsiella oxytoca	S		S	S	S		S	S	S		S	S		S	S		S
151	4/30/2020	April	2020	ER	ER	negative	blood	Staphylococcus aureus													S	S	S		S
152	4/30/2020	April	2020	ER	ER	negative	blood	Escherichia coli	S		S	S	S		S	S	S		R	S		S	S		S
153	4/30/2020	April	2020	ER	ER	negative	urine	Escherichia coli			S	S	S		S		S			I		R	S		R
160	4/4/2020	April	2020	ER	ER	negative	surgical_wound	Staphylococcus aureus													S	S	S		S
161	4/4/2020	April	2020	ER	ER	positive	urine	Pseudomonas aeruginosa			S		S		S		S			S			S		S
162	4/4/2020	April	2020	ER	ER	positive	urine	Providencia rettgeri			I	S	S		S		S			S		S	S		S
163	4/4/2020	April	2020	ER	ER	negative	urine	Escherichia coli			R	R	R		S		S			S		R	R		R
164	4/4/2020	April	2020	ER	ER	negative	catheter_urine	Escherichia coli	S		S	S	S		S	S	S		S	S		S	S		S
186	4/7/2020	April	2020	ER	ER	positive	blood	Staphylococcus haemolyticus													S	S	S		S
187	4/7/2020	April	2020	ER	ER	negative	urine	Escherichia coli			S	S	S		S		S			I		R	S		S
215	5/12/2020	May	2020	ER	ER	negative	blood	Staphylococcus coag negative													S	S	S		S
216	5/12/2020	May	2020	ER	ER	negative	urine	Escherichia coli			S	S	S		S		S			S		S	S		S
217	5/12/2020	May	2020	ER	ER	negative	urine	Pseudomonas aeruginosa			S		S		R		S			S			S		S
218	5/12/2020	May	2020	ER	ER	negative	catheter_urine	Escherichia coli	S		S	S	S		S	S	S		S	S		S	S		S
220	5/13/2020	May	2020	ER	ER	negative	catheter_urine	Escherichia coli	S		S	S	S		S	S	S		R	S		S	S		S
221	5/13/2020	May	2020	ER	ER	negative	catheter_urine	Enterococcus faecalis							S							R			R
229	5/14/2020	May	2020	ER	ER	negative	urine	Escherichia coli			S	S	S		S		S			I		R	S		R
235	5/15/2020	May	2020	ER	ER	negative	blood	Pseudomonas putida	S		S		S		S	S	S		S	S			S		S
236	5/15/2020	May	2020	ER	ER	negative	catheter_urine	Aeromonas caviae			S		I			S						S			S
237	5/15/2020	May	2020	ER	ER	negative	ureter	Escherichia coli	S		R	R	R		R	R	I		R	S		R	R		R
239	5/16/2020	May	2020	ER	ER	negative	catheter_urine	Citrobacter farmeri	S		R	R	R		S	R	S		R	S		S	R		R
241	5/18/2020	May	2020	ER	ER	negative	urine	Escherichia coli			R	R	R		S		S			S		S	S		R
242	5/18/2020	May	2020	ER	ER	negative	catheter_urine	Klebsiella pneumoniae spp pneumoniae	S		S	S	S		S	S	S		S	S		S	S		S
249	5/2/2020	May	2020	ER	ER	negative	blood	Escherichia coli	S		S	S	S		S	S	S		S	S		S	S		S
250	5/2/2020	May	2020	ER	ER	negative	catheter_urine	Klebsiella pneumoniae spp pneumoniae	I		R	R	R		S	R	S		R	R		R	S		R
252	5/20/2020	May	2020	ER	ER	positive	blood	Staphylococcus warneri													S	S	S		S
253	5/20/2020	May	2020	ER	ER	negative	catheter_urine	Klebsiella pneumoniae spp pneumoniae	S		R	R	R		S	I	S		R	S		R	S		I
261	5/22/2020	May	2020	ER	ER	negative	blood	Staphylococcus hominis													R	S	R		S
262	5/22/2020	May	2020	ER	ER	negative	urine	Enterococcus faecalis							S							R			S
264	5/23/2020	May	2020	ER	ER	negative	catheter_urine	Citrobacter koseri	S		S	S	S		S	S	S		I	S		S	S		S
271	5/25/2020	May	2020	ER	ER	negative	blood	Enterobacter cloacae	S		S	R	I		S	S	S		S	S		S	S		S
272	5/25/2020	May	2020	ER	ER	negative	urine	Escherichia coli			S	S	S		S		S			S		S	S		S
286	5/26/2020	May	2020	ER	ER	negative	urine	Escherichia coli			R	S	S		S		I			S		R	R		S
298	5/29/2020	May	2020	ER	ER	negative	bronchus_lavage	Staphylococcus aureus													S	S	S		S
299	5/29/2020	May	2020	ER	ER	negative	urine	Escherichia coli			S	S	S		S		S			S		S	S		R
303	5/3/2020	May	2020	ER	ER	negative	urine	Enterococcus faecalis							S							R			R
304	5/3/2020	May	2020	ER	ER	negative	urine	Enterococcus faecalis							S							R			S
307	5/30/2020	May	2020	ER	ER	negative	urine	Escherichia coli			S	S	S		S		S			S		S	S		I
308	5/30/2020	May	2020	ER	ER	negative	urine	Escherichia coli			S	S	S		S		S			S		S	S		R
309	5/31/2020	May	2020	ER	ER	negative	bronchus_lavage	Escherichia coli	S		S	S	S		S	S	S		R	S		R	S		S
310	5/31/2020	May	2020	ER	ER	negative	catheter_urine	Proteus mirabilis	S		S	R	R			R	S		R	S		S	R	R	R
313	5/4/2020	May	2020	ER	ER	negative	blood	Escherichia coli	S		S	S	S		S	S	S		S	S		S	S		S
325	5/6/2020	May	2020	ER	ER	negative	catheter_urine	Proteus mirabilis	S		S	S	S			R	S		S	S		R	R	R	R
343	5/8/2020	May	2020	ER	ER	negative	venous_catheter	Pseudomonas aeruginosa	S		S		S		S	S	S		S	S			S		S
348	5/9/2020	May	2020	ER	ER	negative	venous_catheter	Staphylococcus haemolyticus													I	R	R		R
349	5/9/2020	May	2020	ER	ER	negative	venous_catheter	Staphylococcus epidermidis													S	I	S		R
350	5/9/2020	May	2020	ER	ER	negative	blood	Staphylococcus hominis													S	S	S		S
351	5/9/2020	May	2020	ER	ER	negative	blood	Staphylococcus coag negative													R	R	S		R
352	5/9/2020	May	2020	ER	ER	negative	catheter_urine	Enterobacter aerogenes	S		S	R	R		S	S	S		R	R		S	S		S
358	6/1/2020	June	2020	ER	ER	negative	urine	Citrobacter freundii			S	S	S		S		S			S		R	S		R
359	6/1/2020	June	2020	ER	ER	negative	urine	Escherichia coli			S	S	S		S		S			S		S	S		S
364	6/10/2020	June	2020	ER	ER	negative	blood	Escherichia coli	S		R	R	R		S	R	S		R	S		S	S		R
365	6/10/2020	June	2020	ER	ER	negative	catheter_urine	Enterococcus faecalis							S							R			R
369	6/11/2020	June	2020	ER	ER	positive	bronchoaspirate	Proteus mirabilis	S		S	S	S			S	S		S	S		S	S	R	S
373	6/12/2020	June	2020	ER	ER	negative	urine	Escherichia coli			S	S	S		S		S			S		S	S		S
378	6/14/2020	June	2020	ER	ER	negative	urine	Escherichia coli			S	R	R		S		S			S		S	S		S
395	6/2/2020	June	2020	ER	ER	negative	urine	Escherichia coli			S	S	S		S		S			S		S	S		R
396	6/2/2020	June	2020	ER	ER	negative	urine	Pseudomonas aeruginosa			S		S		S		S			S			S		S
397	6/2/2020	June	2020	ER	ER	negative	catheter_urine	Escherichia coli	S		S	S	S		S	S	S		S	S		S	S		S
400	6/21/2020	June	2020	ER	ER	negative	catheter_urine	Enterococcus faecalis							S							R			S
401	6/21/2020	June	2020	ER	ER	negative	catheter_urine	Escherichia coli	S		S	S	S		S	S	S		S	S		S	S		S
417	6/25/2020	June	2020	ER	ER	negative	blood	Staphylococcus epidermidis													S	S	S		S
418	6/25/2020	June	2020	ER	ER	negative	blood	Corynebacterium urealyticum													S
424	6/26/2020	June	2020	ER	ER	negative	urine	Enterococcus faecalis							S							R			R
425	6/26/2020	June	2020	ER	ER	negative	catheter_urine	Escherichia coli	S		I	R	S		S	S	S		R	S		S	S		S
431	6/28/2020	June	2020	ER	ER	negative	catheter_urine	Klebsiella pneumoniae spp pneumoniae	S		S	S	S		S	S	S		S	S		S	S		S
434	6/29/2020	June	2020	ER	ER	negative	sputum	Pseudomonas aeruginosa	S	I	R	R	R		S	R	S			S			S		R
447	6/3/2020	June	2020	ER	ER	negative	blood	Staphylococcus coag negative													S	S	R		S
448	6/3/2020	June	2020	ER	ER	negative	blood	Achromobacter spp.	R		R		S		S	R			S	S			R		R
460	6/5/2020	June	2020	ER	ER	negative	blood	Staphylococcus capitis													S	S	R		R
461	6/5/2020	June	2020	ER	ER	negative	urine	Escherichia coli			S	S	S		S		S			S		S	S		S
462	6/5/2020	June	2020	ER	ER	positive	catheter_urine	Klebsiella oxytoca	S		R	S	S		S	S	I		S	S		S	S		S
466	6/6/2020	June	2020	ER	ER	negative	urine	Staphylococcus epidermidis													S	S	S		S
472	6/7/2020	June	2020	ER	ER	positive	blood	Escherichia coli	S		I	R	I		S	R	S		R	S		S	S		R
473	6/7/2020	June	2020	ER	ER	negative	urine	Escherichia coli			S	S	S		S		S			S		S	S		S
475	6/8/2020	June	2020	ER	ER	negative	bronchoaspirate	Stenotrophomonas maltophila														S
476	6/8/2020	June	2020	ER	ER	negative	bronchoaspirate	Enterobacter cloacae	S		S	S	S		S	S	S		S	S		S	S		S
477	6/8/2020	June	2020	ER	ER	negative	urine	Enterococcus faecalis							S							R			S
484	6/9/2020	June	2020	ER	ER	negative	catheter_urine	Enterobacter cloacae	S		R	S	S		S	S	S		S	S		S	S		S
486	7/1/2020	July	2020	ER	ER	negative	urine	Escherichia coli			S	S	S		S		S			S		S	S		S
491	7/10/2020	July	2020	ER	ER	negative	venous_catheter	Staphylococcus epidermidis													S	R	R		R
492	7/10/2020	July	2020	ER	ER	negative	urine	Enterobacter aerogenes			S	S	S		S		S			S		S	S		S
493	7/10/2020	July	2020	ER	ER	negative	urine	Escherichia coli			I	R	I		S		S			S		S	S		S
497	7/11/2020	July	2020	ER	ER	negative	articular_liquid	Enterobacter cloacae	S		R	S	S		S	S	S		R	I		S	S		S
498	7/11/2020	July	2020	ER	ER	negative	urine	Escherichia coli			S	S	S		S		S			S		S	S		S
502	7/12/2020	July	2020	ER	ER	negative	catheter_urine	Escherichia coli	S		R	R	R		S	R	S		R	R		R	R		R
505	7/13/2020	July	2020	ER	ER	negative	urine	Escherichia coli			S	S	S		S		S			S		S	S		I
508	7/14/2020	July	2020	ER	ER	negative	pus	Staphylococcus aureus													S	S	R		S
509	7/14/2020	July	2020	ER	ER	negative	blood	Staphylococcus aureus													S	S	S		S
510	7/14/2020	July	2020	ER	ER	negative	catheter_urine	Enterococcus faecalis							S							R			R
514	7/15/2020	July	2020	ER	ER	negative	articular_liquid	Staphylococcus aureus													S	S	R		S
518	7/16/2020	July	2020	ER	ER	negative	blood	Staphylococcus aureus													S	S	S		S
519	7/16/2020	July	2020	ER	ER	negative	urine	Enterococcus faecalis							S							R			S
528	7/17/2020	July	2020	ER	ER	negative	blood	Klebsiella pneumoniae spp pneumoniae	R		R	R	R	R	R	R	R		R	R		S	R		R
529	7/17/2020	July	2020	ER	ER	negative	blood	Staphylococcus haemolyticus													R	R	R		R
530	7/17/2020	July	2020	ER	ER	negative	blood	Staphylococus schleiferi													S	S	S		S
531	7/17/2020	July	2020	ER	ER	negative	blood	Escherichia coli	S		S	S	S		S	S	S		S	S		S	S		S
532	7/17/2020	July	2020	ER	ER	negative	urine	Enterobacter cloacae			S	S	S		S		S			S		S	S		S
533	7/17/2020	July	2020	ER	ER	negative	catheter_urine	Escherichia coli	S		R	R	R		S	R	S		R	S		R	R		R
542	7/18/2020	July	2020	ER	ER	negative	blood	Streptococcus oralis			S	S					S
545	7/19/2020	July	2020	ER	ER	negative	urine	Proteus mirabilis			S	S	S				S			S		R	R		R
546	7/19/2020	July	2020	ER	ER	negative	catheter_urine	Enterococcus faecalis							S							R			S
551	7/2/2020	July	2020	ER	ER	negative	Others	Staphylococcus intermedius													S	S	S		S
552	7/2/2020	July	2020	ER	ER	negative	Others	Staphylococcus haemolyticus													I	S	R		R
553	7/2/2020	July	2020	ER	ER	negative	Others	Proteus mirabilis	S		S	S	S			S	S		S	S		S	I	R	S
554	7/2/2020	July	2020	ER	ER	negative	catheter_urine	Escherichia coli	S		S	S	S		S	S	S		S	S		S	S		S
564	7/20/2020	July	2020	ER	ER	positive	blood	Staphylococcus aureus													S	S	S		S
565	7/20/2020	July	2020	ER	ER	negative	catheter_urine	Escherichia coli	S			R	I		S	R	S		R	S		R	R		R
569	7/21/2020	July	2020	ER	ER	negative	venous_catheter	Enterobacter asburiae	S		S	S	S		S	S	S		S	S		S	S		S
570	7/21/2020	July	2020	ER	ER	negative	blood	Enterobacter cloacae	S		S	S	S		S	S	S		S	S		S	S		S
571	7/21/2020	July	2020	ER	ER	negative	catheter_urine	Morganella morganii	S		S	R	R		I	S	S			S		S	S	R	S
572	7/21/2020	July	2020	ER	ER	negative	catheter_urine	Enterococcus faecalis							S							R			S
596	7/24/2020	July	2020	ER	ER	negative	blood	Staphylococcus aureus													S	S	S		S
599	7/25/2020	July	2020	ER	ER	negative	catheter_urine	Escherichia coli	S		S	S	S		S	S	S		R	S		R	S		S
607	7/27/2020	July	2020	ER	ER	negative	catheter_urine	Klebsiella pneumoniae spp pneumoniae	S		S	S	S		S	R	S		R	S		S	S		R
608	7/27/2020	July	2020	ER	ER	negative	catheter_urine	Escherichia coli	S		S	S	S		S	S	S		S	S		S	S		S
618	7/28/2020	July	2020	ER	ER	negative	pus	Enterobacter cloacae	S		S	S	S		S	S	S		S	S		S	S		S
619	7/28/2020	July	2020	ER	ER	negative	pus	Staphylococcus haemolyticus													I	S	R		R
620	7/28/2020	July	2020	ER	ER	negative	blood	Staphylococcus epidermidis													I	S	S		S
621	7/28/2020	July	2020	ER	ER	negative	blood	Staphylococcus haemolyticus													S	S	S		S
622	7/28/2020	July	2020	ER	ER	negative	blood	Escherichia coli	S		S	S	S		S	S	S		S	S		S	S		S
623	7/28/2020	July	2020	ER	ER	negative	catheter_urine	Escherichia coli	S		R	R	R		S	R	S		R	I		R	R		R
624	7/28/2020	July	2020	ER	ER	negative	catheter_urine	Pseudomonas aeruginosa	S		S		S		S	S	S		S	S			S		S
633	7/29/2020	July	2020	ER	ER	negative	urine	Escherichia coli			S	S	S		S		S			S		S	S		S
640	7/3/2020	July	2020	ER	ER	negative	blood	Escherichia coli	S		S	S	S		S	R	S		R	S		S	S		R
641	7/3/2020	July	2020	ER	ER	negative	catheter_urine	Escherichia coli	S		S	S	S		S	S	S		S	S		S	S		S
649	7/30/2020	July	2020	ER	ER	negative	pleura_liquid	Streptococcus mitis			S	S					S
653	7/31/2020	July	2020	ER	ER	negative	venous_catheter	Streptococcus bovis II			S	S					S
654	7/31/2020	July	2020	ER	ER	negative	venous_catheter	Pantoea agglomerans	I		S	S	S			R	S		S	S		S	S	R	R
655	7/31/2020	July	2020	ER	ER	negative	blood	Escherichia coli	S		R	R	R		S	R	S		R	S		R	R		R
656	7/31/2020	July	2020	ER	ER	negative	blood	Streptocuccus anginosus			S	S					S
657	7/31/2020	July	2020	ER	ER	negative	urine	Escherichia coli			R	R	R		S		S			I		R	R		R
658	7/31/2020	July	2020	ER	ER	negative	catheter_urine	Escherichia coli	S		S	S	S		S	R	S		R	S		R	S		R
663	7/4/2020	July	2020	ER	ER	positive	blood	Enterococcus faecalis							S							R
664	7/4/2020	July	2020	ER	ER	positive	blood	Staphylococcus epidermidis													S	S	S		S
665	7/4/2020	July	2020	ER	ER	negative	catheter_urine	Escherichia coli	S		I	R	I		S	S	S		R	S		R	S		I
667	7/5/2020	July	2020	ER	ER	negative	urine	Escherichia coli			S	S	S		S		S			S		R	S		S
669	7/6/2020	July	2020	ER	ER	negative	venous_catheter	Staphylococcus haemolyticus													R	R	R		R
670	7/6/2020	July	2020	ER	ER	negative	venous_catheter	Staphylococcus epidermidis													S	R	R		R
694	7/9/2020	July	2020	ER	ER	negative	catheter_urine	Enterococcus faecalis							S							R			S
708	8/10/2020	August	2020	ER	ER	negative	urine	Escherichia coli			S	S	S		S		S			S		S	S		S
714	8/11/2020	August	2020	ER	ER	negative	catheter_urine	Escherichia coli	S		S	S	S		S	R	S		R	S		S	S		R
719	8/12/2020	August	2020	ER	ER	negative	venous_catheter	Staphylococcus haemolyticus													S	R	R		R
731	8/13/2020	August	2020	ER	ER	negative	blood	Staphylococcus hominis													R	S	S		S
732	8/13/2020	August	2020	ER	ER	negative	blood	Staphylococcus epidermidis													S	S	R		R
740	8/14/2020	August	2020	ER	ER	negative	urine	Escherichia coli			S	S	S		S		S			S		R	R		S
741	8/14/2020	August	2020	ER	ER	negative	urine	Enterococcus faecalis							S							R			S
742	8/14/2020	August	2020	ER	ER	negative	urine	Proteus mirabilis			S	S	S				S			S		R	R		R
743	8/14/2020	August	2020	ER	ER	negative	catheter_urine	Escherichia coli	S		R	R	R		S	R	S		R	S		R	S		R
753	8/15/2020	August	2020	ER	ER	negative	catheter_urine	Enterococcus faecalis							S							R			S
754	8/15/2020	August	2020	ER	ER	negative	catheter_urine	Enterobacter cloacae	S		S	S	S		S	S	S		S	S		S	S		S
755	8/15/2020	August	2020	ER	ER	negative	catheter_urine	Escherichia coli	S		R	R	R		S	R	S		R	S		R	S		R
758	8/16/2020	August	2020	ER	ER	negative	urine	Escherichia coli			S	S	S		S		S			S		S	S		S
759	8/16/2020	August	2020	ER	ER	negative	catheter_urine	Enterococcus faecalis							S							R			S
760	8/16/2020	August	2020	ER	ER	negative	catheter_urine	Providencia stuartii	S		R	R	S		I	R			R	S		R	R	R	R
765	8/17/2020	August	2020	ER	ER	positive	blood	Escherichia coli	S		S	S	S		S	S	S		S	S		S	S		S
766	8/17/2020	August	2020	ER	ER	negative	urine	Escherichia coli			S	S	S		S		S			S		S	S		S
772	8/18/2020	August	2020	ER	ER	positive	urine	Citrobacter koseri			S	S	S		S		S			S		S	S		S
773	8/18/2020	August	2020	ER	ER	negative	urine	Proteus mirabilis			S	I	S				S			S		S	R		I
774	8/18/2020	August	2020	ER	ER	negative	catheter_urine	Enterococcus faecalis							S							R			S
778	8/19/2020	August	2020	ER	ER	negative	blood	Escherichia coli	S		S	S	S		S	S	S		S	S		S	S		S
779	8/19/2020	August	2020	ER	ER	negative	urine	Escherichia coli			S	S	S		S		S			S		R	S		S
787	8/2/2020	August	2020	ER	ER	negative	pus	Serratia plymuthica	R		R	R	R		S	R	I		S	S		S	R	R	R
788	8/2/2020	August	2020	ER	ER	negative	pus	Enterococcus faecium							R							R
789	8/2/2020	August	2020	ER	ER	negative	urine	Citrobacter freundii			S	R	R		S		S			S		S	S		S
790	8/2/2020	August	2020	ER	ER	negative	urine	Enterobacter cloacae			I	R	R		S		S			R		S	S		S
791	8/2/2020	August	2020	ER	ER	negative	urine	Escherichia coli			S	S	S		S		S			S		S	S		S
792	8/2/2020	August	2020	ER	ER	negative	urine	Escherichia coli			S	S	S		S		S			S		S	S		R
793	8/2/2020	August	2020	ER	ER	positive	catheter_urine	Escherichia coli	S		R	R	R		S	R	S		R	S		S	S		R
797	8/20/2020	August	2020	ER	ER	negative	venous_catheter	Staphylococcus haemolyticus													R	I	R		S
798	8/20/2020	August	2020	ER	ER	negative	blood	Staphylococcus hominis													S	R	R		S
799	8/20/2020	August	2020	ER	ER	negative	catheter_urine	Escherichia coli	S		S	S	S		S	S	S		S	S		S	S		S
803	8/21/2020	August	2020	ER	ER	negative	catheter_urine	Pseudomonas aeruginosa	S		S		S		S	S	S		S	S			S		S
807	8/22/2020	August	2020	ER	ER	positive	urine	Enterococcus faecalis							S							R			S
808	8/22/2020	August	2020	ER	ER	positive	urine	Staphylococcus hominis													S	S	S		S
823	8/24/2020	August	2020	ER	ER	positive	urine	Escherichia coli			S	S	S		S		S			S		S	S		S
836	8/26/2020	August	2020	ER	ER	negative	pus	Escherichia coli	S		S	S	S		S	S	S		S	S		S	S		S
837	8/26/2020	August	2020	ER	ER	negative	pus	Enterobacter cloacae	S		S	S	S		S	S	S		S	S		S	S		S
838	8/26/2020	August	2020	ER	ER	negative	pus	Staphylococcus intermedius													R	R	R		R
839	8/26/2020	August	2020	ER	ER	negative	blood	Escherichia coli	S		R	R	R		S	R	S		R	S		S	S		R
842	8/27/2020	August	2020	ER	ER	negative	urine	Morganella morganii			S	S	S		I		S			S		S	S		S
849	8/28/2020	August	2020	ER	ER	negative	ureter	Acinetobacter baumanii/calcoaceticus complex	S						R	R	S					S	R	R	R
850	8/28/2020	August	2020	ER	ER	negative	ureter	Enterobacter cloacae	S		S	R	R		S	S	S		I	S		S	S		S
853	8/29/2020	August	2020	ER	ER	negative	blood	Proteus mirabilis	S		R	R	S			R	S		R	S		R	I	R	R
881	8/4/2020	August	2020	ER	ER	negative	blood	Escherichia coli	S		S	S	S		S	S	S		R	S		R	S		S
882	8/4/2020	August	2020	ER	ER	negative	blood	Escherichia coli	S		S	S	S		S	S	S		S	S		S	S		S
883	8/4/2020	August	2020	ER	ER	negative	urine	Escherichia coli			S	S	S		S		S			S		R	S		S
900	8/8/2020	August	2020	ER	ER	negative	urine	Pseudomonas aeruginosa			S		S		S		S			S			S		S
901	8/8/2020	August	2020	ER	ER	negative	urine	Enterococcus faecalis							S							R			S
908	8/9/2020	August	2020	ER	ER	negative	blood	Escherichia coli	S		S	S	S		S	S	S		R	S		R	R		S
909	8/9/2020	August	2020	ER	ER	negative	blood	Staphylococcus hominis													S	S	S		S
910	8/9/2020	August	2020	ER	ER	negative	urine	Proteus mirabilis			S	S	S				S			S		R	R		R
913	9/1/2020	September	2020	ER	ER	negative	blood	Staphylococcus intermedius													S	S	R		S
914	9/1/2020	September	2020	ER	ER	negative	blood	Escherichia coli	S		S	S	S		S	S	S		R	S		S	R		S
915	9/1/2020	September	2020	ER	ER	negative	ureter	Acinetobacter baumanii	S						S	S	S					S	S
916	9/1/2020	September	2020	ER	ER	negative	ureter	Klebsiella pneumoniae spp pneumoniae	S		S	S	S		S	S	S		S	S		S	S		S
923	9/10/2020	September	2020	ER	ER	negative	articular_liquid	Staphylococcus aureus													S	S	S		S
924	9/10/2020	September	2020	ER	ER	negative	catheter_urine	Serratia liquefaciens	S		S	S	S		I	S	S		S	S		S	S		S
925	9/10/2020	September	2020	ER	ER	negative	catheter_urine	Escherichia coli	S		S	S	S		S	S	S		S	S		S	S		S
929	9/11/2020	September	2020	ER	ER	negative	urine	Enterococcus faecium							S							R			R
930	9/11/2020	September	2020	ER	ER	negative	catheter_urine	Escherichia coli	S		S	S	S		S	S	S		S	S		S	S		S
933	9/12/2020	September	2020	ER	ER	negative	urine	Citrobacter koseri			S	S	S		S		S			S		S	S		S
934	9/12/2020	September	2020	ER	ER	negative	urine	Enterococcus faecalis							S							R			S
936	9/14/2020	September	2020	ER	ER	negative	feces	Salmonella spp.	R		S	S	S		S	S	S		S	S		S	R
937	9/14/2020	September	2020	ER	ER	negative	urine	Escherichia coli			S	S	S		S		S			S		S	S		S
951	9/16/2020	September	2020	ER	ER	negative	blood	Staphylococcus epidermidis													S	S	S		S
952	9/16/2020	September	2020	ER	ER	negative	blood	Enterococcus faecalis							S							R
953	9/16/2020	September	2020	ER	ER	negative	pus	Staphylococcus aureus													S	S	S		S
954	9/16/2020	September	2020	ER	ER	negative	catheter_urine	Escherichia coli	S		S	S	S		S	S	S		R	S		S	S		S
955	9/16/2020	September	2020	ER	ER	negative	catheter_urine	Proteus mirabilis	S		S	S	S			R	S		S	S		R	R	R	R
966	9/18/2020	September	2020	ER	ER	negative	blood	Escherichia coli	S		S	S	S		S	S	S		R	S		S	S		S
967	9/18/2020	September	2020	ER	ER	negative	urine	Enterococcus faecalis							S							R			S
968	9/18/2020	September	2020	ER	ER	negative	catheter_urine	Escherichia coli	S		S	S	S		S	S	S		S	S		S	S		S
969	9/18/2020	September	2020	ER	ER	negative	catheter_urine	Staphylococcus aureus													S	S	S		S
974	9/19/2020	September	2020	ER	ER	negative	bronchoaspirate	Klebsiella pneumoniae spp pneumoniae	S		S	S	S		S	S	S		S	S		S	S		S
975	9/19/2020	September	2020	ER	ER	negative	bronchoaspirate	Staphylococcus aureus													S	S	S		S
976	9/19/2020	September	2020	ER	ER	negative	bronchoaspirate	Pseudomonas aeruginosa	S		S		S		S	S	S		S	S			S		S
977	9/19/2020	September	2020	ER	ER	positive	catheter_urine	Staphylococcus haemolyticus													R	R	R		R
978	9/19/2020	September	2020	ER	ER	positive	catheter_urine	Acinetobacter baumanii/calcoaceticus complex	R						R	R	R					R	R	R	R
979	9/19/2020	September	2020	ER	ER	positive	catheter_urine	Enterococcus faecalis							S							R			S
980	9/19/2020	September	2020	ER	ER	positive	catheter_urine	Escherichia coli	S		R	R	R		S	R	S		R	S		S	S		R
987	9/2/2020	September	2020	ER	ER	negative	urine	Moellerella wisconsensis			R	R	R		S		I			S		R	R		R
988	9/2/2020	September	2020	ER	ER	negative	urine	Proteus mirabilis			I	R	S				S			S		R	I		R
996	9/20/2020	September	2020	ER	ER	negative	blood	Streptococcus dysgalactiae spp. equisimilis								S					S					S
997	9/20/2020	September	2020	ER	ER	negative	blood	Escherichia coli	S		S	S	S		S	S	S		S	S		S	S		S
998	9/21/2020	September	2020	ER	ER	negative	catheter_urine	Pseudomonas aeruginosa	S		S		S		S	S	S		S	S			S		S
999	9/21/2020	September	2020	ER	ER	negative	catheter_urine	Enterococcus faecalis							S							R			R
1006	9/22/2020	September	2020	ER	ER	negative	urine	Escherichia coli			S	S	S		S		S			S		S	S		S
1007	9/22/2020	September	2020	ER	ER	negative	catheter_urine	Escherichia coli	S		R	R	R		S	R	S		R	S		S	R		R
1008	9/22/2020	September	2020	ER	ER	negative	catheter_urine	Escherichia coli	S		S	S	S		S	S	S		R	S		S	R		S
1018	9/23/2020	September	2020	ER	ER	negative	catheter_urine	Proteus mirabilis	S		R	R	R			R	S		R	S		S	R	R	R
1029	9/24/2020	September	2020	ER	ER	negative	catheter_urine	Escherichia coli	S		R	R	R		S	R	S		R	S		S	R		R
1034	9/25/2020	September	2020	ER	ER	negative	blood	Staphylococcus hominis													S	I	R		R
1035	9/25/2020	September	2020	ER	ER	negative	blood	Staphylococcus hominis													S	S	R		S
1036	9/25/2020	September	2020	ER	ER	negative	urine	Klebsiella pneumoniae spp pneumoniae			R	R	R		R		R			R		S	S		R
1037	9/25/2020	September	2020	ER	ER	negative	catheter_urine	Pseudomonas aeruginosa	S		S		S		S	S	S		S	S			S		S
1038	9/25/2020	September	2020	ER	ER	negative	catheter_urine	Klebsiella pneumoniae spp pneumoniae	S		R	R	R		R	R	R		R	R		R	R		R
1069	9/29/2020	September	2020	ER	ER	negative	urine	Proteus mirabilis			S	S	S				S			S		S	S		S
1070	9/29/2020	September	2020	ER	ER	negative	catheter_urine	Escherichia coli	S		S	S	S		S	S	S		S	S		S	S		S
1074	9/3/2020	September	2020	ER	ER	negative	venous_catheter	Serratia marcescens	I		S	S	S		S	S	S		S	S		S	S	R	S
1080	9/30/2020	September	2020	ER	ER	negative	blood	Staphylococcus aureus								R					R	S	S		R
1086	9/4/2020	September	2020	ER	ER	negative	urine	Staphylococcus haemolyticus													S	S	S		S
1087	9/4/2020	September	2020	ER	ER	negative	urine	Escherichia coli			S	S	S		S		S			S		S	S		S
1088	9/4/2020	September	2020	ER	ER	negative	catheter_urine	Enterococcus faecalis							S							R			S
1098	9/5/2020	September	2020	ER	ER	negative	ascites	Staphylococcus epidermidis													S	S	S		S
1099	9/5/2020	September	2020	ER	ER	negative	urine	Escherichia coli			S	S	S		S		S			S		R	S		S
1109	9/6/2020	September	2020	ER	ER	positive	catheter_urine	Klebsiella pneumoniae spp pneumoniae	S		R	R	R	R	R	R	R		R	R		R	R		R
1114	9/7/2020	September	2020	ER	ER	negative	ureter	Pseudomonas aeruginosa	S		S		S		S	S	S		S	S			S		S
1115	9/7/2020	September	2020	ER	ER	negative	ureter	Enterococcus faecalis							S							R			S
1125	9/8/2020	September	2020	ER	ER	negative	surgical_wound	Staphylococcus aureus													S	S	S		S
1126	9/8/2020	September	2020	ER	ER	negative	urine	Morganella morganii			S	S	S		I		S			S		R	S		R
1127	9/8/2020	September	2020	ER	ER	negative	urine	Enterococcus faecalis							S							R			S
1128	9/8/2020	September	2020	ER	ER	negative	catheter_urine	Escherichia coli	S		I	R	R		S	R	S		R	S		R	R		R
1129	9/8/2020	September	2020	ER	ER	negative	catheter_urine	Morganella morganii	I		S	S	S		R	R	S			S		R	R	R	R
1132	9/9/2020	September	2020	ER	ER	negative	ascites	Enterococcus faecalis							S							R
1133	9/9/2020	September	2020	ER	ER	negative	urine	Escherichia coli			S	S	S		S		S			S		S	S		S
1134	9/9/2020	September	2020	ER	ER	negative	urine	Klebsiella pneumoniae spp pneumoniae			S	S	S		S		S			S		S	S		S
1142	10/1/2020	October	2020	ER	ER	positive	blood	Staphylococcus hominis								S					R		S		S
1143	10/1/2020	October	2020	ER	ER	negative	urine	Escherichia coli	S	S	S	S	S		S	S	S		R	S	R	R	R	S	S
1144	10/1/2020	October	2020	ER	ER	negative	urine	Escherichia coli	S	S	S	S	S		S	S	S		R	S	R	S	S	R	S
1145	10/1/2020	October	2020	ER	ER	negative	catheter_urine	Escherichia coli	I	I	I	R	I		S	R	S		R	S	R	R	S	S	R	R
1146	10/1/2020	October	2020	ER	ER	negative	catheter_urine	Pseudomonas aeruginosa	S	S	S	R	S		I	R	S		S	S	R	R	S	S	R	R
1147	10/1/2020	October	2020	ER	ER	negative	catheter_urine	Escherichia coli	S	S	S	S	S		S	S	S		R	S	R	R	S	S	S	S
1157	10/10/2020	October	2020	ER	ER	negative	urine	Enterococcus faecalis								S					R	R	R		S
1160	10/11/2020	October	2020	ER	ER	negative	blood	Staphylococcus capitis								S						S	R		S
1161	10/11/2020	October	2020	ER	ER	negative	urine	Escherichia coli	S	S	S	S	S		S	S	S		R	S	R	S	S	S	S
1166	10/12/2020	October	2020	ER	ER	negative	catheter_urine	Citrobacter farmeri	I	R	I	R	I		S	R	S			S			S		R
1178	10/13/2020	October	2020	ER	ER	negative	urine	Escherichia coli	S	S	S	S	S		S	S	S		R	S	R	S	S	S	S	S
1179	10/13/2020	October	2020	ER	ER	negative	urine	Escherichia coli	S	R	S	S	I		S	R	S		S	S	R	S	S	R	R
1200	10/16/2020	October	2020	ER	ER	negative	surgical_wound	Klebsiella pneumoniae	S	S	S	S	S		S	S	S			I		S	R		S
1201	10/16/2020	October	2020	ER	ER	negative	surgical_wound	Escherichia coli	S	S	S	S	S		S	S	S			S		R	S		S
1202	10/16/2020	October	2020	ER	ER	negative	blood	Staphylococcus aureus								S					S	S	S		S
1203	10/16/2020	October	2020	ER	ER	negative	blood	Pseudomonas aeruginosa	S	I	S	R	S		S	S	S			S		R	S		S
1207	10/17/2020	October	2020	ER	ER	positive	surgical_wound	Staphylococcus aureus								R					S	I	S		R
1208	10/17/2020	October	2020	ER	ER	positive	blood	Staphylococcus intermedius								S					S	S	S		S
1210	10/18/2020	October	2020	ER	ER	positive	blood	Enterobacter aerogenes	S	R	R	R	R		S	R	S			S		R	R		R
1211	10/18/2020	October	2020	ER	ER	negative	blood	Staphylococcus epidermidis	R							R					S	R	R		R
1212	10/18/2020	October	2020	ER	ER	negative	urine	Klebsiella pneumoniae	S	R	R	R	R		S	S	S		R	S	R	S	S	S	S
1213	10/18/2020	October	2020	ER	ER	negative	urine	Citrobacter farmeri	S	S	S	R	S		S	S	S		R	S	R	S	R	R	S
1214	10/18/2020	October	2020	ER	ER	positive	catheter_urine	Klebsiella oxytoca	S	R	R	R	R		S	R	S		R	S	R	I	S	S	R
1221	10/19/2020	October	2020	ER	ER	negative	venous_catheter	Staphylococcus epidermidis								R					S	R	R		R
1244	10/21/2020	October	2020	ER	ER	negative	urine	Proteus mirabilis	I	S	S	S	S		S	S	S		S	S	R	R	S	R	S
1253	10/22/2020	October	2020	ER	ER	negative	catheter_urine	Escherichia coli	S	S	S	S	I		S	S	S			S		R	S		S
1261	10/23/2020	October	2020	ER	ER	positive	blood	Escherichia coli	S	S	S	S	S		S	S	S			S		S	S		S
1262	10/23/2020	October	2020	ER	ER	positive	urine	Enterococcus faecalis								R					R	R	R
1271	10/25/2020	October	2020	ER	ER	negative	urine	Escherichia coli	S	S	S	S	S		S	S	S		S	S	R	S	S	S	S
1272	10/25/2020	October	2020	ER	ER	positive	catheter_urine	Klebsiella oxytoca	S	S	S	S	S		S	S	S			S		S	S		S
1275	10/26/2020	October	2020	ER	ER	negative	drainage_liquid	Escherichia coli	S	S	S	S	S		S	S	S			S		S	S		S
1281	10/28/2020	October	2020	ER	ER	positive	blood	Streptocuccus anginosus													R	R
1292	10/3/2020	October	2020	ER	ER	positive	catheter_urine	Pseudomonas aeruginosa	S	I	S	R	S		S	S	S		S	S	R	R	S	R	S	R
1293	10/30/2020	October	2020	ER	ER	positive	urine	Escherichia coli	S	S	S	S	S		S	S	S		S	S		S	S	S	S
1300	10/4/2020	October	2020	ER	ER	negative	urine	Escherichia coli	S			S	S		S				S		R	S	S		S	S
1303	10/5/2020	October	2020	ER	ER	negative	catheter	Staphylococcus lugdunensis								S					S	I	R		S
1309	10/6/2020	October	2020	ER	ER	negative	urine	Escherichia coli	S	S	S	S	S		S	S	S		R	S	R	S	S	S	S
1310	10/6/2020	October	2020	ER	ER	positive	catheter_urine	Escherichia coli	S	R	R	R	R		S	R	S			S		S	R		R
1316	10/7/2020	October	2020	ER	ER	negative	blood	Staphylococcus aureus								S						S	S		S
1333	10/9/2020	October	2020	ER	ER	negative	blood	Staphylococcus hominis spp. hominis								R					S	R	R		R
1334	10/9/2020	October	2020	ER	ER	negative	urine	Escherichia coli	S	S	S	S	S		S	S	S		S	S	R	R	S	S	S	S
1340	11/10/2020	November	2020	ER	ER	positive	catheter_urine	Escherichia coli	S	R	R	R	R		S	R	S		R	S		R	R	S	R
1354	11/13/2020	November	2020	ER	ER	negative	urine	Enterobacter aerogenes	S		R	R	R		S	S		R		S		S	S	S	R
1355	11/13/2020	November	2020	ER	ER	negative	urine	Serratia odorifera 1	S		S		R		S	S		I		S		S	I	R	S
1356	11/13/2020	November	2020	ER	ER	positive	catheter_urine	Staphylococcus aureus								R					I	S	R		R
1361	11/14/2020	November	2020	ER	ER	negative	pus	Staphylococcus aureus								S					S	S	S		S
1368	11/16/2020	November	2020	ER	ER	positive	bronchus_lavage	Klebsiella pneumoniae	S	S	S	S	S		S	S	S			S		S	S		S
1369	11/16/2020	November	2020	ER	ER	positive	bronchus_lavage	Serratia marcescens	S	S	S		S		S	S	S			S		S	S		S
1370	11/16/2020	November	2020	ER	ER	positive	bronchus_lavage	Staphylococcus aureus								S					R	S	R		R
1371	11/16/2020	November	2020	ER	ER	positive	catheter_urine	Klebsiella pneumoniae	S	S	S	R	S		S	S	S		S	S		S	S	R	S
1383	11/17/2020	November	2020	ER	ER	positive	catheter_urine	Escherichia coli	I	S	S	S	S		S	S	S		I	S		S	I	S	S
1406	11/20/2020	November	2020	ER	ER	negative	bronchus_lavage	Staphylococcus aureus								R					S	S	S		R
1412	11/21/2020	November	2020	ER	ER	negative	catheter_urine	Klebsiella pneumoniae	S	S	S	S	S		S	R	S			S		S	S		R
1416	11/22/2020	November	2020	ER	ER	negative	urine	Escherichia coli	S		S	S	S		S	S		S		S		R	S	S	S
1468	11/27/2020	November	2020	ER	ER	negative	urine	Escherichia coli	R		R	S	I		S	S				R		R	I	R	S
1469	11/27/2020	November	2020	ER	ER	negative	catheter_urine	Pseudomonas aeruginosa	I	I	S	R	S		S	S	S		S	S	R		S	S	S	R
1472	11/28/2020	November	2020	ER	ER	negative	blood	Escherichia coli	S	R	R	R	R		S	R	S			S		R	S		R
1473	11/29/2020	November	2020	ER	ER	negative	urine	Escherichia coli	S		S	S	S		S	S		S		S		S	S	S	S
1474	11/29/2020	November	2020	ER	ER	negative	urine	Escherichia coli	S		R	R	R		S	R		R		S		R	R	S	R
1476	11/3/2020	November	2020	ER	ER	positive	catheter_urine	Escherichia coli	S	R	R	R	R		S	R	S			S		R	R		R
1477	11/3/2020	November	2020	ER	ER	positive	catheter_urine	Providencia stuartii	S	S	I	I	S		S	R	S			S		R	R		R
1483	11/30/2020	November	2020	ER	ER	negative	bronchus_lavage	Escherichia coli	S	R	I	R	I		S	R	S			S		S	S		R
1484	11/30/2020	November	2020	ER	ER	negative	drainage_liquid	Staphylococcus epidermidis								R					S	R	R		R
1485	11/30/2020	November	2020	ER	ER	negative	catheter_urine	Escherichia coli	S	R	R	R	R		S	R	S		R	S		S	S	S	R
1502	11/4/2020	November	2020	ER	ER	negative	urine	Escherichia coli	S	S	S	S	S		S	S	S		R	S	R	R	S	S	S
1523	11/6/2020	November	2020	ER	ER	positive	blood	Staphylococcus hominis spp. hominis								R					S	S	S		R
1532	11/7/2020	November	2020	ER	ER	negative	blood	Staphylococcus hominis spp. hominis								S					S	S	S		S
1533	11/7/2020	November	2020	ER	ER	negative	blood	Escherichia coli	S	S	S	S	S		S	S	S			S		S	S		S
1537	11/8/2020	November	2020	ER	ER	negative	blood	Enterococcus faecalis													S	R	R
1539	11/9/2020	November	2020	ER	ER	positive	blood	Staphylococcus epidermidis								R					R	S	R		R
1540	11/9/2020	November	2020	ER	ER	positive	catheter_urine	Proteus mirabilis	S		I	R	R		S	R		R		S		R	R	R	R
1558	12/1/2020	December	2020	ER	ER	negative	urine	Escherichia coli	S		S	S	S		S	S		S		S		S	S	S	S
1559	12/1/2020	December	2020	ER	ER	negative	urine	Escherichia coli	S		S	S	S		S	S		S		S		S	S	S	S
1575	12/11/2020	December	2020	ER	ER	negative	blood	Escherichia coli	S	S	S	S	S		S	S	S			S		S	S		S
1576	12/11/2020	December	2020	ER	ER	negative	catheter_urine	Klebsiella oxytoca	S	R	S	I	S		S	S	S			R		S	S		R
1581	12/12/2020	December	2020	ER	ER	negative	urine	Streptococcus bovis I								S					R
1582	12/12/2020	December	2020	ER	ER	negative	urine	Enterococcus faecalis								S					S	R	R		S
1590	12/14/2020	December	2020	ER	ER	negative	bronchoaspirate	Staphylococcus aureus								S						S	R		S
1591	12/14/2020	December	2020	ER	ER	negative	urine	Proteus mirabilis	S		S	S	S		S	R		R		S		R	S	R	R
1598	12/15/2020	December	2020	ER	ER	negative	bronchus_lavage	Staphylococcus aureus								R					S	S	S		R
1599	12/15/2020	December	2020	ER	ER	negative	bronchus_lavage	Morganella morganii	S	S	I		S		I	R	S			S		R	S		R
1600	12/15/2020	December	2020	ER	ER	negative	urine	Klebsiella pneumoniae	S		S	S	S		S	S				S		S	S	S	S
1609	12/16/2020	December	2020	ER	ER	negative	blood	Staphylococcus aureus								S					S	S	S		S
1610	12/16/2020	December	2020	ER	ER	negative	urine	Escherichia coli	S		S	S	S		S	S				S		R	S	S	S
1611	12/16/2020	December	2020	ER	ER	negative	urine	Escherichia coli	S		S	S	S		S	S		S		S		S	I	S	S
1614	12/17/2020	December	2020	ER	ER	negative	blood	Klebsiella pneumoniae	R	R	R	R	R		I	R	I		R	R		R	R	S	R
1615	12/17/2020	December	2020	ER	ER	negative	catheter_urine	Escherichia coli	S	S	S	S	S		S	R	S		R	S		R	R	S	R
1616	12/17/2020	December	2020	ER	ER	negative	catheter_urine	Enterococcus faecalis								R					R	R	R		R
1626	12/18/2020	December	2020	ER	ER	negative	urine	Escherichia coli	S		S	S	S		S	R				S		S	S	S	R
1645	12/20/2020	December	2020	ER	ER	negative	catheter_urine	Proteus mirabilis	I	S	S	S	S		S	S	S		S	S		I	I	R	S
1656	12/22/2020	December	2020	ER	ER	negative	urine	Enterococcus faecalis								R					R	R	R		I
1670	12/24/2020	December	2020	ER	ER	positive	catheter_urine	Escherichia coli	S	R	R	R	R		S	R	S		R	S		S	S	S	R
1690	12/26/2020	December	2020	ER	ER	positive	blood	Enterococcus faecalis													S	R	R
1694	12/27/2020	December	2020	ER	ER	positive	venous_catheter	Staphylococcus aureus								R					S	S	S		R
1699	12/28/2020	December	2020	ER	ER	negative	blood	Enterobacter spp.	S	S	S	S	I		S	S	S			S		S	S		S
1714	12/29/2020	December	2020	ER	ER	negative	blood	Escherichia coli	S	S	S	S	S		S	S	S			S		S	S		S
1715	12/29/2020	December	2020	ER	ER	negative	catheter_urine	Escherichia coli	S	S	S	S	S		S	S	S		R	S		S	S	S	S
1716	12/29/2020	December	2020	ER	ER	negative	catheter_urine	Escherichia coli	S	S	S	S	S		S	S	S		R	S		R	S	S	S
1725	12/3/2020	December	2020	ER	ER	positive	pleura_liquid	Staphylococcus epidermidis								S					R	S	R		S
1726	12/3/2020	December	2020	ER	ER	positive	blood	Klebsiella oxytoca	S	S	S	S	S		S	S	S			S		S	S		S
1733	12/30/2020	December	2020	ER	ER	positive	urine	Escherichia coli	S	S	S	S	S		S	S	S			S		S	S		S
1735	12/31/2020	December	2020	ER	ER	negative	liquor	Neisseria meningitidis				S					S
1749	12/4/2020	December	2020	ER	ER	positive	blood	Escherichia coli	S	S	S	S	S		S	S	S			S		S	S		S
1752	12/5/2020	December	2020	ER	ER	negative	urine	Escherichia coli	S		R	R	R		S	R		R		S		R	R	S	R
1760	12/7/2020	December	2020	ER	ER	positive	bronchus_lavage	Pseudomonas aeruginosa	I		R	R	R		R	R	I		R	R			R	S	R
1761	12/7/2020	December	2020	ER	ER	negative	ureter	Proteus mirabilis	S	S	S	S	S		S	S	S		R	S		R	I	R	R
1762	12/7/2020	December	2020	ER	ER	negative	ureter	Enterococcus faecalis								R					R	R	R		R
1774	12/8/2020	December	2020	ER	ER	positive	urine	Klebsiella pneumoniae	S		S	S	S		S	S				S		S	S	S	S
1775	12/8/2020	December	2020	ER	ER	positive	urine	Escherichia coli	S		S	S	S		S	S				S		S	S	S	S
1778	12/9/2020	December	2020	ER	ER	negative	urine	Pseudomonas aeruginosa	S		S	R	S		S	S				S			S	R	S
1779	12/9/2020	December	2020	ER	ER	negative	urine	Escherichia coli	S		S	S	S		S	R		I		S		R	S	S	R
1780	12/9/2020	December	2020	ER	ER	negative	catheter_urine	Escherichia coli	S	S	S	S	S		S	R	S		S	S		S	S	S	R
1787	1/10/2021	January	2021	ER	ER	negative	urine	Proteus vulgaris	S		S	S	S		S	S				S		R	S	R	S
1788	1/10/2021	January	2021	ER	ER	negative	urine	Staphylococcus epidermidis								R					S	S	S		R
1789	1/10/2021	January	2021	ER	ER	negative	urine	Enterococcus faecalis								R					R	R	R		R
1790	1/10/2021	January	2021	ER	ER	negative	urine	Escherichia coli	S		R	R	R		S	R		R		S		S	S	S	R
1803	1/11/2021	January	2021	ER	ER	negative	urine	Klebsiella pneumoniae	S		S	S	S		S	S				S		S	S	S	S
1804	1/11/2021	January	2021	ER	ER	positive	catheter_urine	Escherichia coli	S	R	R	R	R		S	R	S		R	S		S	S	S	R
1811	1/12/2021	January	2021	ER	ER	negative	sputum	Staphylococcus aureus								S					S	S	S		S
1812	1/12/2021	January	2021	ER	ER	positive	blood	Escherichia coli	R	S	S	S	S		S	S	S			S		S	R		S
1813	1/12/2021	January	2021	ER	ER	negative	catheter_urine	Escherichia coli	S	S	S	S	S		S	S	S		S	S		S	S	S	S
1814	1/12/2021	January	2021	ER	ER	negative	catheter_urine	Enterococcus faecalis								S					R	R	R		S
1829	1/14/2021	January	2021	ER	ER	negative	blood	Escherichia coli	S	R	R	R	R		S	R	S			S		R	R		R
1844	1/16/2021	January	2021	ER	ER	negative	blood	Staphylococcus intermedius								R					S	R	R		R
1855	1/18/2021	January	2021	ER	ER	negative	exudate	Staphylococcus aureus								R					R	S	R		R
1856	1/18/2021	January	2021	ER	ER	negative	urine	Enterococcus faecalis								S					S	R	R		S
1878	1/20/2021	January	2021	ER	ER	negative	blood	Staphylococcus hominis spp. hominis								S					S	S	R		S
1879	1/20/2021	January	2021	ER	ER	negative	urine	Escherichia coli	S		R	R	R		S	R		R		S		S	S	S	R
1911	1/25/2021	January	2021	ER	ER	negative	catheter_urine	Escherichia coli	S		S	S	S		S	S		S		S		S	S	S	S
1933	1/27/2021	January	2021	ER	ER	positive	blood	Streptococcus mitis			S	S		S		S	S				S					S
1934	1/28/2021	January	2021	ER	ER	negative	urine	Klebsiella oxytoca	S	S	S	S	S		S	S	S		R	S		S	S	S	S
1935	1/28/2021	January	2021	ER	ER	negative	urine	Enterococcus faecium								R					R	R	R		R
1936	1/28/2021	January	2021	ER	ER	negative	catheter_urine	Klebsiella pneumoniae	S	R	R	R	R		S	S	S		R	S		R	S	S	S
1947	1/4/2021	January	2021	ER	ER	negative	catheter_urine	Enterococcus faecalis								R					R	R	R		R
1948	1/4/2021	January	2021	ER	ER	negative	catheter_urine	Escherichia coli	S	S	S	S	S		S	R	S		S	S		R	S	S	R
1949	1/4/2021	January	2021	ER	ER	negative	catheter_urine	Proteus mirabilis	S	S	S	S	S		S	S	S		S	S		S	S	R	S
1963	1/6/2021	January	2021	ER	ER	negative	venous_catheter	Escherichia coli	S	I	S	S	I		S	S	S			S		S	S		S
1964	1/6/2021	January	2021	ER	ER	negative	blood	Escherichia coli	S	S	S	S	S		S	R	S			I		S	I		R
1965	1/6/2021	January	2021	ER	ER	negative	urine	Escherichia coli	S		S	S	S		S	S		R		S		R	R	S	S
1974	1/7/2021	January	2021	ER	ER	negative	catheter_urine	Escherichia coli	S	S	S	S	S		S	S	S		R	S		S	S	S	S
1984	1/8/2021	January	2021	ER	ER	negative	blood	Staphylococcus simulans								S					R	S	R		S
1985	1/8/2021	January	2021	ER	ER	negative	catheter_urine	Enterobacter cloacae	S		I	R	R		I	R		R		R		R	S		R
1986	1/8/2021	January	2021	ER	ER	negative	catheter_urine	Proteus mirabilis	S	S	S	S	S		I	R	S			S		S	S		R
1999	1/9/2021	January	2021	ER	ER	positive	urine	Escherichia coli	S		S	I	S		S	R		S		S		R	I	R	S
1	3/26/2020	March	2020	Anesthesiology and Reanimation	ICU	negative	bronchoaspirate	Pseudomonas aeruginosa	S		S		S		S	S	S		S	S			S		S
2	3/26/2020	March	2020	Anesthesiology and Reanimation	ICU	negative	bronchoaspirate	Stenotrophomonas maltophila														S
3	3/26/2020	March	2020	Anesthesiology and Reanimation	ICU	negative	bronchoaspirate	Proteus mirabilis	S		S	S	S			S	S		S	S		S	S	R	S
4	3/26/2020	March	2020	Anesthesiology and Reanimation	ICU	negative	catheter_urine	Enterobacter cloacae	S		S	S	S		S	S	S		R	S		S	S		S
12	3/28/2020	March	2020	Anesthesiology and Reanimation	ICU	negative	blood	Haemophilus influenzae				S		R		S	R				S	R			S	S
13	3/28/2020	March	2020	Anesthesiology and Reanimation	ICU	negative	catheter_urine	Morganella morganii	S		S	S	S		S	S	S			S		S	S	R	S
15	3/30/2020	March	2020	Anesthesiology and Reanimation	ICU	negative	bronchoaspirate	Enterococcus faecalis							S							R
16	3/30/2020	March	2020	Anesthesiology and Reanimation	ICU	negative	bronchoaspirate	Serratia marcescens	S		S	S	S		S	S	S		S	S		S	S	R	S
17	3/30/2020	March	2020	Anesthesiology and Reanimation	ICU	negative	bronchoaspirate	Pseudomonas aeruginosa	R		R		R		R	R	R		R	R			R		R
18	3/30/2020	March	2020	Anesthesiology and Reanimation	ICU	negative	bronchoaspirate	Pseudomonas aeruginosa	S		S		S		S	S	S		S	S			S		S
19	3/30/2020	March	2020	Anesthesiology and Reanimation	ICU	negative	bronchoaspirate	Serratia marcescens	S		S	S	S		S	S	S		S	S		S	S	R	S
20	3/30/2020	March	2020	Anesthesiology and Reanimation	ICU	negative	bronchoaspirate	Pseudomonas aeruginosa	S		S		S		S	S	S		S	S			S		S
21	3/30/2020	March	2020	Anesthesiology and Reanimation	ICU	negative	catheter_urine	Proteus mirabilis			S	S	S				S			S		S	R		S
22	3/30/2020	March	2020	Anesthesiology and Reanimation	ICU	negative	catheter_urine	Escherichia coli	S		I	S	I		S	S	S		R	R		S	S		S
30	4/1/2020	April	2020	Anesthesiology and Reanimation	ICU	negative	venous_catheter	Staphylococcus capitis													S	S	R		R
34	4/10/2020	April	2020	Anesthesiology and Reanimation	ICU	negative	venous_catheter	Enterococcus faecalis							S							R
35	4/10/2020	April	2020	Anesthesiology and Reanimation	ICU	negative	venous_catheter	Escherichia coli	S		S	S	S		S	S	S		R	S		R	S		I
45	4/12/2020	April	2020	Anesthesiology and Reanimation	ICU	positive	bronchoaspirate	Escherichia coli	S		S	S	S		S	S	S		R	S		S	S		S
46	4/12/2020	April	2020	Anesthesiology and Reanimation	ICU	negative	bronchus_lavage	Staphylococcus epidermidis													S	S	R		S
47	4/12/2020	April	2020	Anesthesiology and Reanimation	ICU	positive	venous_catheter	Staphylococcus epidermidis													S	R	R		R
48	4/12/2020	April	2020	Anesthesiology and Reanimation	ICU	positive	venous_catheter	Staphylococcus hominis													S	S	S		S
52	4/13/2020	April	2020	Anesthesiology and Reanimation	ICU	positive	bronchoaspirate	Klebsiella pneumoniae spp pneumoniae	S		S	S	I		S	S	S		R	R		S	S		S
53	4/13/2020	April	2020	Anesthesiology and Reanimation	ICU	positive	bronchoaspirate	Pseudomonas putida	S		S		S		S	S	S		S	S			S		S
54	4/13/2020	April	2020	Anesthesiology and Reanimation	ICU	negative	bronchoaspirate	Staphylococcus aureus													S	S	R		R
55	4/13/2020	April	2020	Anesthesiology and Reanimation	ICU	positive	blood	Staphylococcus epidermidis													S	S	S		S
56	4/13/2020	April	2020	Anesthesiology and Reanimation	ICU	negative	blood	Staphylococcus epidermidis													S	S	S		S
57	4/13/2020	April	2020	Anesthesiology and Reanimation	ICU	negative	catheter_urine	Escherichia coli			S	S	S		S		S			S		S	S		S
60	4/14/2020	April	2020	Anesthesiology and Reanimation	ICU	positive	bronchoaspirate	Staphylococcus aureus													S	S	S		S
61	4/14/2020	April	2020	Anesthesiology and Reanimation	ICU	positive	bronchoaspirate	Proteus mirabilis	S		S	S	S			S	S		S	S		S	S	R	S
62	4/14/2020	April	2020	Anesthesiology and Reanimation	ICU	positive	bronchoaspirate	Serratia plymuthica	I		S	S	S		S	S	S		S	S		S	S	R	S
63	4/14/2020	April	2020	Anesthesiology and Reanimation	ICU	negative	bronchoaspirate	Escherichia coli	I		I	R	S		S	R	S		R	I		R	S		R
64	4/14/2020	April	2020	Anesthesiology and Reanimation	ICU	negative	bronchoaspirate	Pseudomonas aeruginosa	S		S		S		S	S	S		S	S			S		S
69	4/15/2020	April	2020	Anesthesiology and Reanimation	ICU	negative	venous_catheter	Staphylococcus aureus													S	S	S		S
71	4/16/2020	April	2020	Anesthesiology and Reanimation	ICU	positive	bronchoaspirate	Citrobacter braakii	S		S	S	S		S	S	S		S	S		S	S		S
72	4/16/2020	April	2020	Anesthesiology and Reanimation	ICU	positive	bronchoaspirate	Klebsiella oxytoca	S		S	S	S		S	S	S		S	S		S	S		S
73	4/16/2020	April	2020	Anesthesiology and Reanimation	ICU	negative	bronchoaspirate	Morganella morganii	S		S	R	R		I	S	S			S		S	S	R	S
74	4/16/2020	April	2020	Anesthesiology and Reanimation	ICU	negative	bronchoaspirate	Pseudomonas aeruginosa	S		S		S		S	S	S		S	S			S		S
75	4/16/2020	April	2020	Anesthesiology and Reanimation	ICU	negative	bronchoaspirate	Citrobacter freundii	S		S	S	S		S	S	S		S	S		S	S		S
76	4/16/2020	April	2020	Anesthesiology and Reanimation	ICU	negative	bronchoaspirate	Enterococcus faecalis							S							R
77	4/16/2020	April	2020	Anesthesiology and Reanimation	ICU	negative	catheter_urine	Escherichia coli	S		S	S	S		S	I	S		R	S		S	R		I
82	4/17/2020	April	2020	Anesthesiology and Reanimation	ICU	negative	venous_catheter	Enterococcus faecalis							S							R
83	4/17/2020	April	2020	Anesthesiology and Reanimation	ICU	negative	venous_catheter	Streptocuccus anginosus			S	S					S
93	4/2/2020	April	2020	Anesthesiology and Reanimation	ICU	negative	bronchoaspirate	Morganella morganii	S		S	S	S		S	S	S			S		S	S	R	S
94	4/2/2020	April	2020	Anesthesiology and Reanimation	ICU	negative	bronchoaspirate	Klebsiella oxytoca	S		S	S	S		S	S	S		S	S		S	S		S
95	4/2/2020	April	2020	Anesthesiology and Reanimation	ICU	negative	bronchoaspirate	Staphylococcus epidermidis													R	S	S		S
96	4/2/2020	April	2020	Anesthesiology and Reanimation	ICU	negative	blood	Staphylococcus hominis													I	S	S		S
99	4/20/2020	April	2020	Anesthesiology and Reanimation	ICU	positive	bronchoaspirate	Serratia marcescens	I		S	S	S		S	S	S		S	S		S	S	R	S
100	4/20/2020	April	2020	Anesthesiology and Reanimation	ICU	positive	bronchoaspirate	Pseudomonas aeruginosa	S		S		S		S	S	S		S	S			S		S
101	4/20/2020	April	2020	Anesthesiology and Reanimation	ICU	positive	bronchoaspirate	Acinetobacter baumanii	S						S	S	S					S	S
102	4/20/2020	April	2020	Anesthesiology and Reanimation	ICU	negative	bronchoaspirate	Achromobacter spp.	R		R		R		I	R			S	S			R		R
103	4/20/2020	April	2020	Anesthesiology and Reanimation	ICU	negative	bronchoaspirate	Pseudomonas spp.	S		S		S		S	S	S		S	S			S		S
104	4/20/2020	April	2020	Anesthesiology and Reanimation	ICU	negative	bronchoaspirate	Klebsiella pneumoniae spp pneumoniae	S		S	S	S		S	S	S		R	S		S	S		S
105	4/20/2020	April	2020	Anesthesiology and Reanimation	ICU	negative	bronchoaspirate	Pseudomonas aeruginosa	S		S		S		S	R	S		S	S			S		R
106	4/20/2020	April	2020	Anesthesiology and Reanimation	ICU	negative	bronchoaspirate	Enterococcus faecalis							S							R
107	4/20/2020	April	2020	Anesthesiology and Reanimation	ICU	negative	bronchoaspirate	Pseudomonas aeruginosa	S		S		S		S	S	S		S	S			S		S
108	4/20/2020	April	2020	Anesthesiology and Reanimation	ICU	negative	blood	Enterococcus faecium							R							R
112	4/22/2020	April	2020	Anesthesiology and Reanimation	ICU	positive	bronchoaspirate	Haemophilus influenzae				S		S	S	S	S				S	S			S	S
117	4/23/2020	April	2020	Anesthesiology and Reanimation	ICU	negative	bronchoaspirate	Serratia marcescens	S		S	S	S		S	S	S		S	S		S	S	R	S
118	4/23/2020	April	2020	Anesthesiology and Reanimation	ICU	positive	blood	Staphylococcus capitis													S	S	S		S
124	4/24/2020	April	2020	Anesthesiology and Reanimation	ICU	negative	bronchoaspirate	Staphylococcus aureus													S	S	S		S
139	4/27/2020	April	2020	Anesthesiology and Reanimation	ICU	negative	venous_catheter	Klebsiella pneumoniae spp pneumoniae	S		R	R	R	R	R	R	R		R	R		R	R		R
149	4/3/2020	April	2020	Anesthesiology and Reanimation	ICU	negative	venous_catheter	Staphylococcus epidermidis													I	R	R		R
154	4/30/2020	April	2020	Anesthesiology and Reanimation	ICU	negative	bronchoaspirate	Pseudomonas aeruginosa	S		S		S		S	S	S		S	S			S		S
155	4/30/2020	April	2020	Anesthesiology and Reanimation	ICU	positive	bronchus_lavage	Citrobacter farmeri	S		I	R	R		S	S	S		R	R		S	S		S
156	4/30/2020	April	2020	Anesthesiology and Reanimation	ICU	negative	venous_catheter	Enterococcus faecalis							S							R
157	4/30/2020	April	2020	Anesthesiology and Reanimation	ICU	negative	blood	Staphylococcus hominis													S	I	R		R
165	4/4/2020	April	2020	Anesthesiology and Reanimation	ICU	negative	venous_catheter	Enterococcus faecalis							S							R
174	4/6/2020	April	2020	Anesthesiology and Reanimation	ICU	positive	bronchoaspirate	Pseudomonas aeruginosa	S		S		S		S	S	S		S	S			S		S
175	4/6/2020	April	2020	Anesthesiology and Reanimation	ICU	positive	bronchoaspirate	Staphylococcus aureus													S	S	S		S
176	4/6/2020	April	2020	Anesthesiology and Reanimation	ICU	negative	bronchoaspirate	Staphylococcus aureus													S	S	S		S
177	4/6/2020	April	2020	Anesthesiology and Reanimation	ICU	negative	bronchoaspirate	Escherichia coli	S		R	R	R		S	R	S		R	S		R	R		R
178	4/6/2020	April	2020	Anesthesiology and Reanimation	ICU	negative	bronchoaspirate	Serratia marcescens	S		S	S	S		S	S	S		S	S		S	S	R	S
179	4/6/2020	April	2020	Anesthesiology and Reanimation	ICU	negative	bronchoaspirate	Klebsiella oxytoca	S		S	S	S		S	S	S		S	S		S	S		S
180	4/6/2020	April	2020	Anesthesiology and Reanimation	ICU	negative	bronchoaspirate	Escherichia coli	S		S	S	S		S	R	S		S	S		S	S		R
181	4/6/2020	April	2020	Anesthesiology and Reanimation	ICU	negative	bronchoaspirate	Streptocuccus anginosus			S	S					S						R
182	4/6/2020	April	2020	Anesthesiology and Reanimation	ICU	negative	venous_catheter	Staphylococcus hominis													R	S	S		S
183	4/6/2020	April	2020	Anesthesiology and Reanimation	ICU	negative	urine	Enterococcus faecalis							S							R			S
188	4/7/2020	April	2020	Anesthesiology and Reanimation	ICU	negative	bronchoaspirate	Staphylococcus aureus													S	S	S		R
189	4/7/2020	April	2020	Anesthesiology and Reanimation	ICU	negative	cutaneous_lesion	Staphylococcus epidermidis													S	R	R		R
190	4/7/2020	April	2020	Anesthesiology and Reanimation	ICU	negative	venous_catheter	Staphylococcus epidermidis													I	S	S		S
191	4/7/2020	April	2020	Anesthesiology and Reanimation	ICU	negative	blood	Enterococcus faecalis							S							R
193	4/8/2020	April	2020	Anesthesiology and Reanimation	ICU	negative	venous_catheter	Staphylococcus capitis													S	S	S		S
194	4/8/2020	April	2020	Anesthesiology and Reanimation	ICU	negative	blood	Staphylococcus epidermidis													R	S	R		R
195	4/8/2020	April	2020	Anesthesiology and Reanimation	ICU	negative	blood	Enterococcus faecalis							S							R
197	4/9/2020	April	2020	Anesthesiology and Reanimation	ICU	negative	bronchoaspirate	Serratia marcescens	S		S	S	S		S	S	S		S	S		S	S	R	S
198	4/9/2020	April	2020	Anesthesiology and Reanimation	ICU	negative	bronchoaspirate	Escherichia coli	I		S	R	S		S	R	S		R	I		R	S		R
200	5/1/2020	May	2020	Anesthesiology and Reanimation	ICU	negative	blood	Serratia marcescens	S		R	S	S		S	S	I		S	S		S	S	R	S
201	5/1/2020	May	2020	Anesthesiology and Reanimation	ICU	negative	blood	Staphylococcus epidermidis														R	R		R
202	5/1/2020	May	2020	Anesthesiology and Reanimation	ICU	negative	catheter_urine	Proteus mirabilis	S		S	R	I			I	S		R	S		S	R	R	I
209	5/11/2020	May	2020	Anesthesiology and Reanimation	ICU	negative	bronchoaspirate	Pseudomonas aeruginosa	S		S		S		S	S	S		S	S			S		S
210	5/11/2020	May	2020	Anesthesiology and Reanimation	ICU	negative	bronchoaspirate	Staphylococcus aureus													S	S	S		R
211	5/11/2020	May	2020	Anesthesiology and Reanimation	ICU	negative	bronchoaspirate	Klebsiella pneumoniae spp pneumoniae	S		R	R	R		R	R	R		R	R		R	R		R
219	5/12/2020	May	2020	Anesthesiology and Reanimation	ICU	negative	bedsore	Staphylococcus haemolyticus													I	R	R		R
222	5/13/2020	May	2020	Anesthesiology and Reanimation	ICU	negative	blood	Enterococcus faecalis							S							R
230	5/14/2020	May	2020	Anesthesiology and Reanimation	ICU	negative	bronchoaspirate	Escherichia coli	S		S	S	S		S	S	S		R	S		S	S		S
231	5/14/2020	May	2020	Anesthesiology and Reanimation	ICU	negative	bronchoaspirate	Serratia marcescens	S		S	S	S		S	S	S		S	S		S	S	R	S
243	5/18/2020	May	2020	Anesthesiology and Reanimation	ICU	negative	bronchoaspirate	Pseudomonas aeruginosa	S		R		R		S	S	S			R			S		S
254	5/20/2020	May	2020	Anesthesiology and Reanimation	ICU	negative	venous_catheter	Staphylococcus epidermidis													I	R	R		R
256	5/21/2020	May	2020	Anesthesiology and Reanimation	ICU	negative	bronchoaspirate	Stenotrophomonas maltophila														S
268	5/24/2020	May	2020	Anesthesiology and Reanimation	ICU	negative	venous_catheter	Staphylococcus capitis													S	S	R		R
273	5/25/2020	May	2020	Anesthesiology and Reanimation	ICU	positive	bronchoaspirate	Escherichia coli	S		R	R	R		S	R	S		R	I		R	I		R
274	5/25/2020	May	2020	Anesthesiology and Reanimation	ICU	positive	bronchoaspirate	Pseudomonas aeruginosa	S		R		R		R	S	R		R	R			S		S
275	5/25/2020	May	2020	Anesthesiology and Reanimation	ICU	negative	bronchoaspirate	Pseudomonas aeruginosa	S		R		S		S	R	S		R	S			R		R
276	5/25/2020	May	2020	Anesthesiology and Reanimation	ICU	negative	bronchus_lavage	Escherichia coli	I		R	R	I		S	R	S		R	R		R	S		R
277	5/25/2020	May	2020	Anesthesiology and Reanimation	ICU	negative	bronchus_lavage	Serratia marcescens	S		S	S	S		S	S	S		S	S		S	S	R	S
289	5/27/2020	May	2020	Anesthesiology and Reanimation	ICU	positive	bronchoaspirate	Pseudomonas aeruginosa	S		S		S		S	S	S		S	S			S		S
292	5/28/2020	May	2020	Anesthesiology and Reanimation	ICU	positive	bronchoaspirate	Klebsiella pneumoniae spp pneumoniae	S		R	R	R	R	R	R	I		R	R		R	R		R
293	5/28/2020	May	2020	Anesthesiology and Reanimation	ICU	negative	bronchoaspirate	Citrobacter freundii	S		S	R	R		S	S	S		R	R		S	S		S
294	5/28/2020	May	2020	Anesthesiology and Reanimation	ICU	negative	blood	Enterobacter cloacae	S		R	R	R		S	S	S		R	R		S	S		S
295	5/28/2020	May	2020	Anesthesiology and Reanimation	ICU	negative	blood	Enterococcus casseliflavus/gallinarum							S							R
300	5/29/2020	May	2020	Anesthesiology and Reanimation	ICU	negative	rectal_tampon	Enterobacter aerogenes	S		R	R	R		R	R	I		R	R		R	R	R	R
314	5/4/2020	May	2020	Anesthesiology and Reanimation	ICU	positive	bronchoaspirate	Pseudomonas aeruginosa	S		S		S		S	S	S		S	S			S		S
315	5/4/2020	May	2020	Anesthesiology and Reanimation	ICU	positive	bronchoaspirate	Stenotrophomonas maltophila														S
316	5/4/2020	May	2020	Anesthesiology and Reanimation	ICU	positive	bronchoaspirate	Pseudomonas aeruginosa	R		R		R		R	R	R		R	R			R		R
317	5/4/2020	May	2020	Anesthesiology and Reanimation	ICU	positive	bronchoaspirate	Escherichia coli	S		S	S	S		S	S	S		S	S		S	S		S
318	5/4/2020	May	2020	Anesthesiology and Reanimation	ICU	positive	bronchoaspirate	Serratia marcescens	S		S	S	S		S	S	S		S	S		S	S	R	S
319	5/4/2020	May	2020	Anesthesiology and Reanimation	ICU	negative	bronchoaspirate	Staphylococcus aureus													S	S	R		S
320	5/4/2020	May	2020	Anesthesiology and Reanimation	ICU	negative	bronchoaspirate	Hafnia alvei	S		S	S	I		S	S	S		S	S		S	S	R	S
321	5/4/2020	May	2020	Anesthesiology and Reanimation	ICU	negative	rectal_tampon	Klebsiella pneumoniae spp pneumoniae	S		R	R	R		R	R	R		R	R		R	R		R
326	5/6/2020	May	2020	Anesthesiology and Reanimation	ICU	positive	venous_catheter	Staphylococcus epidermidis													I	R	R		R
333	5/7/2020	May	2020	Anesthesiology and Reanimation	ICU	positive	bronchoaspirate	Klebsiella pneumoniae spp pneumoniae	S		R	R	R		R	R	I		R	R		R	R		R
334	5/7/2020	May	2020	Anesthesiology and Reanimation	ICU	positive	bronchoaspirate	Klebsiella pneumoniae spp pneumoniae	S		R	R	R		S	R	S		R	R		R	R		R
335	5/7/2020	May	2020	Anesthesiology and Reanimation	ICU	negative	bronchoaspirate	Enterococcus faecalis							S							R
336	5/7/2020	May	2020	Anesthesiology and Reanimation	ICU	negative	bronchoaspirate	Escherichia coli	S		R	R	R		I	R	S		R	R		R	R		R
337	5/7/2020	May	2020	Anesthesiology and Reanimation	ICU	negative	venous_catheter	Staphylococcus epidermidis													I	R	R		R
338	5/7/2020	May	2020	Anesthesiology and Reanimation	ICU	positive	blood	Enterococcus faecalis							S							R
339	5/7/2020	May	2020	Anesthesiology and Reanimation	ICU	positive	blood	Enterococcus faecalis							S							R
353	5/9/2020	May	2020	Anesthesiology and Reanimation	ICU	negative	blood	Staphylococcus epidermidis														R	R		R
366	6/10/2020	June	2020	Anesthesiology and Reanimation	ICU	negative	venous_catheter	Staphylococcus epidermidis													S	S	S		R
374	6/12/2020	June	2020	Anesthesiology and Reanimation	ICU	positive	blood	Staphylococcus capitis													S	R	R		R
380	6/15/2020	June	2020	Anesthesiology and Reanimation	ICU	positive	bronchoaspirate	Pseudomonas aeruginosa	S		S		R		S	S	S		R	S			S		S
381	6/15/2020	June	2020	Anesthesiology and Reanimation	ICU	negative	bronchoaspirate	Klebsiella pneumoniae spp pneumoniae	S		R	R	R		S	R	S		R	R		R	R		R
391	6/18/2020	June	2020	Anesthesiology and Reanimation	ICU	negative	cavitary_liquid	Staphylococcus capitis													S	S	S		R
398	6/20/2020	June	2020	Anesthesiology and Reanimation	ICU	negative	urine	Escherichia coli			R	R	R		S		S			S		R	R		R
402	6/21/2020	June	2020	Anesthesiology and Reanimation	ICU	negative	bronchoaspirate	Proteus mirabilis	S		S	S	S			S	S		S	S		S	R	R	S
403	6/21/2020	June	2020	Anesthesiology and Reanimation	ICU	negative	bronchoaspirate	Escherichia coli	S		S	S	S		S	S	S		R	I		S	S		S
404	6/21/2020	June	2020	Anesthesiology and Reanimation	ICU	negative	bronchoaspirate	Stenotrophomonas maltophila														S
408	6/22/2020	June	2020	Anesthesiology and Reanimation	ICU	negative	blood	Staphylococcus epidermidis													S	S	S		S
411	6/23/2020	June	2020	Anesthesiology and Reanimation	ICU	negative	bronchoaspirate	Staphylococcus aureus													S	S	S		S
419	6/25/2020	June	2020	Anesthesiology and Reanimation	ICU	negative	bronchoaspirate	Proteus mirabilis	S		S	S	S			I	S		S	S		S	R	R	I
420	6/25/2020	June	2020	Anesthesiology and Reanimation	ICU	negative	bronchoaspirate	Staphylococcus epidermidis													R	R	R		R
421	6/25/2020	June	2020	Anesthesiology and Reanimation	ICU	negative	venous_catheter	Staphylococcus hominis													S	S	S		S
422	6/25/2020	June	2020	Anesthesiology and Reanimation	ICU	negative	venous_catheter	Staphylococcus epidermidis													I	S	R		R
435	6/29/2020	June	2020	Anesthesiology and Reanimation	ICU	positive	bronchoaspirate	Klebsiella pneumoniae spp pneumoniae	S		R	R	R		S	R	S		R	R		R	R		R
436	6/29/2020	June	2020	Anesthesiology and Reanimation	ICU	negative	bronchoaspirate	Escherichia coli	S		S	S	S		S	S	S		R	R		R	S		S
437	6/29/2020	June	2020	Anesthesiology and Reanimation	ICU	negative	bronchoaspirate	Pseudomonas aeruginosa	S		S		S		S	S	S		S	S			S		S
438	6/29/2020	June	2020	Anesthesiology and Reanimation	ICU	negative	bronchoaspirate	Enterobacter aerogenes	S		S	R	R		S	S	S		R	R		S	S		S
439	6/29/2020	June	2020	Anesthesiology and Reanimation	ICU	negative	bronchoaspirate	Klebsiella pneumoniae spp pneumoniae	S		S	S	S		S	S	S		S	S		S	S		S
440	6/29/2020	June	2020	Anesthesiology and Reanimation	ICU	negative	bronchoaspirate	Enterobacter aerogenes	S		R	R	R		S	R	S		R	I		R	S	R	R
441	6/29/2020	June	2020	Anesthesiology and Reanimation	ICU	negative	bronchoaspirate	Serratia marcescens	I		S	S	S		S	S	S		S	S		S	S	R	S
452	6/30/2020	June	2020	Anesthesiology and Reanimation	ICU	negative	bronchoaspirate	Enterococcus faecalis							S							R
467	6/6/2020	June	2020	Anesthesiology and Reanimation	ICU	negative	bronchoaspirate	Staphylococcus aureus													S	S	S		S
478	6/8/2020	June	2020	Anesthesiology and Reanimation	ICU	positive	bronchoaspirate	Klebsiella pneumoniae spp pneumoniae	S		R	R	R		S	R	S		R	I		R	R		R
479	6/8/2020	June	2020	Anesthesiology and Reanimation	ICU	negative	bronchoaspirate	Pseudomonas aeruginosa	S		S		S		R	S	R		S	S			S		S
494	7/10/2020	July	2020	Anesthesiology and Reanimation	ICU	negative	venous_catheter	Staphylococcus epidermidis													I	R	R		R
495	7/10/2020	July	2020	Anesthesiology and Reanimation	ICU	negative	blood	Staphylococcus capitis													I	R	R		R
499	7/11/2020	July	2020	Anesthesiology and Reanimation	ICU	positive	blood	Enterococcus faecalis							S							R
503	7/12/2020	July	2020	Anesthesiology and Reanimation	ICU	negative	bronchoaspirate	Acinetobacter baumanii	S						S	S	S					S	S
504	7/12/2020	July	2020	Anesthesiology and Reanimation	ICU	negative	bronchoaspirate	Staphylococus schleiferi													R	S	R		S
511	7/14/2020	July	2020	Anesthesiology and Reanimation	ICU	negative	bronchoaspirate	Staphylococcus aureus													S	S	R		S
512	7/14/2020	July	2020	Anesthesiology and Reanimation	ICU	negative	blood	Staphylococcus epidermidis													I	R	R		R
520	7/16/2020	July	2020	Anesthesiology and Reanimation	ICU	negative	bronchoaspirate	Klebsiella oxytoca	S		S	S	S		S	S	S		R	S		S	S		S
521	7/16/2020	July	2020	Anesthesiology and Reanimation	ICU	negative	venous_catheter	Enterococcus spp.														R
534	7/17/2020	July	2020	Anesthesiology and Reanimation	ICU	negative	venous_catheter	Staphylococcus epidermidis													S	S	R		R
535	7/17/2020	July	2020	Anesthesiology and Reanimation	ICU	negative	blood	Pseudomonas aeruginosa	S		S		S		R	S	I		S	S			S		S
555	7/2/2020	July	2020	Anesthesiology and Reanimation	ICU	negative	venous_catheter	Staphylococcus lugdunensis													S	S	S		S
566	7/20/2020	July	2020	Anesthesiology and Reanimation	ICU	positive	bronchoaspirate	Staphylococcus epidermidis													S	R	R		R
567	7/20/2020	July	2020	Anesthesiology and Reanimation	ICU	negative	bronchoaspirate	Stenotrophomonas maltophila														S
577	7/22/2020	July	2020	Anesthesiology and Reanimation	ICU	negative	bronchoaspirate	Staphylococcus hominis													S	R	R		R
578	7/22/2020	July	2020	Anesthesiology and Reanimation	ICU	negative	bronchoaspirate	Proteus penneri	S		S	S	S		S	S	S		S	S		S	S	R	S
579	7/22/2020	July	2020	Anesthesiology and Reanimation	ICU	negative	pus	Enterococcus faecium							R							R
602	7/26/2020	July	2020	Anesthesiology and Reanimation	ICU	negative	bronchoaspirate	Pseudomonas aeruginosa	S		S		S		S	S	S		S	S			S		S
603	7/26/2020	July	2020	Anesthesiology and Reanimation	ICU	negative	bronchoaspirate	Stenotrophomonas maltophila														S
604	7/26/2020	July	2020	Anesthesiology and Reanimation	ICU	positive	venous_catheter	Staphylococcus epidermidis													I	R	R		R
605	7/26/2020	July	2020	Anesthesiology and Reanimation	ICU	positive	catheter_urine	Staphylococcus haemolyticus													S	R	R		R
609	7/27/2020	July	2020	Anesthesiology and Reanimation	ICU	negative	catheter_urine	Klebsiella pneumoniae spp pneumoniae	R		R	R	R	R	R	R	R		R	R		R	R		R
634	7/29/2020	July	2020	Anesthesiology and Reanimation	ICU	negative	bedsore	Pseudomonas aeruginosa	S		S		S		S	S	S		S	S			S		S
635	7/29/2020	July	2020	Anesthesiology and Reanimation	ICU	negative	blood	Enterococcus faecium							R							R
642	7/3/2020	July	2020	Anesthesiology and Reanimation	ICU	negative	bronchoaspirate	Acinetobacter baumanii	S						S	S	S					S	S		I
643	7/3/2020	July	2020	Anesthesiology and Reanimation	ICU	positive	venous_catheter	Staphylococcus sciuri													S	R	R		R
644	7/3/2020	July	2020	Anesthesiology and Reanimation	ICU	positive	blood	Staphylococcus hominis													S	R	R		R
650	7/30/2020	July	2020	Anesthesiology and Reanimation	ICU	negative	bronchoaspirate	Pseudomonas aeruginosa	S		S		S		R	R	R		S	S			S		S
651	7/30/2020	July	2020	Anesthesiology and Reanimation	ICU	negative	bronchoaspirate	Acinetobacter baumanii	R						R	R	R					R	R		R
652	7/30/2020	July	2020	Anesthesiology and Reanimation	ICU	positive	rectal_tampon	Klebsiella pneumoniae spp pneumoniae	S		R	R	R		R	R	R		R	R		R	R		R
671	7/6/2020	July	2020	Anesthesiology and Reanimation	ICU	negative	bronchoaspirate	Pseudomonas aeruginosa	S		S		S		S	S	S		S	S			S		S
687	7/7/2020	July	2020	Anesthesiology and Reanimation	ICU	negative	bronchus_lavage	Pseudomonas aeruginosa	S		S		S		S	S	S		S	S			S		S
700	8/1/2020	August	2020	Anesthesiology and Reanimation	ICU	positive	bronchoaspirate	Escherichia coli	S		S	S	S		S	I	S		R	S		S	S		I
701	8/1/2020	August	2020	Anesthesiology and Reanimation	ICU	negative	bronchoaspirate	Staphylococcus epidermidis													I	R	R		R
709	8/10/2020	August	2020	Anesthesiology and Reanimation	ICU	negative	bronchoaspirate	Pseudomonas aeruginosa	S		R		R		S	S	S		R	R			S		S
715	8/11/2020	August	2020	Anesthesiology and Reanimation	ICU	negative	bronchoaspirate	Acinetobacter baumanii	R						R	R	R					R	R		R
720	8/12/2020	August	2020	Anesthesiology and Reanimation	ICU	negative	surgical_wound	Enterococcus faecium							R							R
721	8/12/2020	August	2020	Anesthesiology and Reanimation	ICU	negative	peritoneal_liquid	Enterobacter cloacae	S		S	S	I		S	S	S		R	R		S	S		S
722	8/12/2020	August	2020	Anesthesiology and Reanimation	ICU	negative	blood	Clostridium novyi A							S					R						R
733	8/13/2020	August	2020	Anesthesiology and Reanimation	ICU	negative	bronchoaspirate	Pseudomonas aeruginosa	S		S		S		S	S	S		S	S			S		S
734	8/13/2020	August	2020	Anesthesiology and Reanimation	ICU	negative	bronchoaspirate	Escherichia coli	S		S	S	S		S	S	S		S	S		S	S		S
735	8/13/2020	August	2020	Anesthesiology and Reanimation	ICU	negative	blood	Enterococcus faecium							R							R
736	8/13/2020	August	2020	Anesthesiology and Reanimation	ICU	negative	vaginal_secretion	Pseudomonas aeruginosa	R		R		S		R	R	R		R	R			R		R
744	8/14/2020	August	2020	Anesthesiology and Reanimation	ICU	negative	blood	Staphylococcus hominis													S	I	R		R
745	8/14/2020	August	2020	Anesthesiology and Reanimation	ICU	negative	blood	Staphylococcus haemolyticus													S	R	R		R
767	8/17/2020	August	2020	Anesthesiology and Reanimation	ICU	negative	bronchoaspirate	Enterococcus faecalis							S							R
800	8/20/2020	August	2020	Anesthesiology and Reanimation	ICU	negative	bronchoaspirate	Staphylococcus aureus													S	S	S		R
801	8/20/2020	August	2020	Anesthesiology and Reanimation	ICU	positive	pus	Staphylococcus epidermidis														R	R		R
804	8/21/2020	August	2020	Anesthesiology and Reanimation	ICU	negative	bedsore	Escherichia coli	S		S		S	S	S	S	S			S		S	S		S
809	8/22/2020	August	2020	Anesthesiology and Reanimation	ICU	negative	bronchoaspirate	Streptocuccus anginosus			S	S					S						R
810	8/22/2020	August	2020	Anesthesiology and Reanimation	ICU	negative	catheter_urine	Pasteuerlla aerogenes				S				S						S			S
816	8/23/2020	August	2020	Anesthesiology and Reanimation	ICU	negative	bronchoaspirate	Staphylococcus aureus													S	S	S		S
817	8/23/2020	August	2020	Anesthesiology and Reanimation	ICU	negative	bronchoaspirate	Pseudomonas aeruginosa	S		S		S		R	S	I		S	S			S		S
818	8/23/2020	August	2020	Anesthesiology and Reanimation	ICU	negative	venous_catheter	Staphylococcus epidermidis													S	R	R		R
819	8/23/2020	August	2020	Anesthesiology and Reanimation	ICU	negative	catheter_urine	Enterococcus faecalis							S							R			S
824	8/24/2020	August	2020	Anesthesiology and Reanimation	ICU	negative	bronchoaspirate	Enterococcus faecalis							S							R
829	8/25/2020	August	2020	Anesthesiology and Reanimation	ICU	positive	bronchoaspirate	Pseudomonas aeruginosa	S		S		S		S	S	S		S	S			S		S
843	8/27/2020	August	2020	Anesthesiology and Reanimation	ICU	negative	bronchoaspirate	Enterococcus faecalis							S							R
844	8/27/2020	August	2020	Anesthesiology and Reanimation	ICU	negative	bronchoaspirate	Stenotrophomonas maltophila														S
845	8/27/2020	August	2020	Anesthesiology and Reanimation	ICU	negative	rectal_tampon	Klebsiella pneumoniae spp pneumoniae	S		R	R	R		R	R	R		R	R		S	R		R
856	8/3/2020	August	2020	Anesthesiology and Reanimation	ICU	negative	bronchoaspirate	Enterobacter aerogenes	S		R	R	R	R	R	S	R		R	R		S	S		S
857	8/3/2020	August	2020	Anesthesiology and Reanimation	ICU	negative	bronchoaspirate	Staphylococcus haemolyticus													I	R	R		R
862	8/30/2020	August	2020	Anesthesiology and Reanimation	ICU	negative	bronchoaspirate	Staphylococcus epidermidis													R	S	R		R
863	8/30/2020	August	2020	Anesthesiology and Reanimation	ICU	negative	bronchoaspirate	Staphylococcus aureus													S	S	S		S
875	8/31/2020	August	2020	Anesthesiology and Reanimation	ICU	negative	bronchoaspirate	Pseudomonas aeruginosa	S		S		S		R	R	S		S	S			S		R
876	8/31/2020	August	2020	Anesthesiology and Reanimation	ICU	negative	bronchoaspirate	Escherichia coli	S		S	S	S		S	R	S		R	S		R	R		R
877	8/31/2020	August	2020	Anesthesiology and Reanimation	ICU	negative	bronchoaspirate	Pseudomonas aeruginosa	S		S		S		S	S	S		S	S			S		S
878	8/31/2020	August	2020	Anesthesiology and Reanimation	ICU	negative	venous_catheter	Enterococcus raffinosus							S							R
891	8/6/2020	August	2020	Anesthesiology and Reanimation	ICU	negative	bronchoaspirate	Staphylococcus aureus													S	S	R		S
895	8/7/2020	August	2020	Anesthesiology and Reanimation	ICU	negative	venous_catheter	Staphylococcus epidermidis													S	S	S		S
917	9/1/2020	September	2020	Anesthesiology and Reanimation	ICU	positive	venous_catheter	Corynebacterium renale													R
926	9/10/2020	September	2020	Anesthesiology and Reanimation	ICU	negative	bronchoaspirate	Cedecea davisae	R		R	R	R		I	R	R		R	R		R	R	R	R
927	9/10/2020	September	2020	Anesthesiology and Reanimation	ICU	negative	bronchoaspirate	Klebsiella pneumoniae spp pneumoniae	I		R	R	R		S	S	S		R	I		R	S		S
938	9/14/2020	September	2020	Anesthesiology and Reanimation	ICU	positive	bronchoaspirate	Sphingomonas paucimobilis	S	R	R		R		R	R	S		R	R
939	9/14/2020	September	2020	Anesthesiology and Reanimation	ICU	negative	bronchoaspirate	Staphylococcus aureus													S	S	S		S
940	9/14/2020	September	2020	Anesthesiology and Reanimation	ICU	negative	bronchoaspirate	Haemophilus influenzae			S	S			S	S	S				S				S	S
941	9/14/2020	September	2020	Anesthesiology and Reanimation	ICU	negative	ascites	Staphylococcus sciuri													S	S	S		S
956	9/16/2020	September	2020	Anesthesiology and Reanimation	ICU	negative	bronchus_lavage	Enterobacter cloacae	S		S	S	S		S	S	S		S	S		S	S		S
962	9/17/2020	September	2020	Anesthesiology and Reanimation	ICU	negative	bronchoaspirate	Pseudomonas aeruginosa	S		S		R		S	S	S		S	S			S		S
963	9/17/2020	September	2020	Anesthesiology and Reanimation	ICU	negative	bronchoaspirate	Corynebacterium matruchotii													R				R
964	9/17/2020	September	2020	Anesthesiology and Reanimation	ICU	negative	venous_catheter	Staphylococcus epidermidis													S	R	S		S
981	9/19/2020	September	2020	Anesthesiology and Reanimation	ICU	negative	catheter_urine	Enterococcus faecium							R							R			R
989	9/2/2020	September	2020	Anesthesiology and Reanimation	ICU	positive	bronchoaspirate	Corynebacterium spp.													S				S
1000	9/21/2020	September	2020	Anesthesiology and Reanimation	ICU	negative	bronchoaspirate	Corynebacterium amycolatum													R				R
1001	9/21/2020	September	2020	Anesthesiology and Reanimation	ICU	negative	bronchoaspirate	Chryseobacterium meningosepticum	S		R		R		R	R	R		R	S			S	R	R
1009	9/22/2020	September	2020	Anesthesiology and Reanimation	ICU	negative	peritoneal_liquid	Pseudomonas aeruginosa	S		S		S		S	S	S		S	S			S		S
1010	9/22/2020	September	2020	Anesthesiology and Reanimation	ICU	negative	peritoneal_liquid	Citrobacter freundii	S		S	S	S		S	S	S		S	S		S	S		S
1030	9/24/2020	September	2020	Anesthesiology and Reanimation	ICU	negative	bronchoaspirate	Pseudomonas putida	R		R		R		R	R	R		R	R			R		R
1051	9/26/2020	September	2020	Anesthesiology and Reanimation	ICU	negative	surgical_wound	Staphylococcus haemolyticus													S	S	R		S
1055	9/27/2020	September	2020	Anesthesiology and Reanimation	ICU	negative	ureter	Pseudomonas aeruginosa	R		R		R		R	R	R		R	R			S		R
1059	9/28/2020	September	2020	Anesthesiology and Reanimation	ICU	negative	bronchoaspirate	Klebsiella pneumoniae spp pneumoniae	S		R	R	R	R	R	R	R		R	R		S	R		R
1060	9/28/2020	September	2020	Anesthesiology and Reanimation	ICU	negative	bronchoaspirate	Stenotrophomonas maltophila														S
1061	9/28/2020	September	2020	Anesthesiology and Reanimation	ICU	negative	bronchoaspirate	Escherichia coli	S		R	R	R		S	R	S		R	S		R	R	R	R
1062	9/28/2020	September	2020	Anesthesiology and Reanimation	ICU	positive	rectal_tampon	Klebsiella pneumoniae spp pneumoniae	R		R	R	R		R	R	R		R	R		R	R		R
1063	9/28/2020	September	2020	Anesthesiology and Reanimation	ICU	negative	rectal_tampon	Klebsiella pneumoniae spp pneumoniae	R		R	R	R		R	R	R		R	R		S	R		R
1064	9/28/2020	September	2020	Anesthesiology and Reanimation	ICU	negative	catheter_urine	Escherichia coli	S		S	S	S		S	R	S		R	S		S	S		R
1075	9/3/2020	September	2020	Anesthesiology and Reanimation	ICU	positive	bronchoaspirate	Escherichia coli	S		I	S	S		S	I	S		R	R		R	S		I
1081	9/30/2020	September	2020	Anesthesiology and Reanimation	ICU	negative	drainage_liquid	Enterococcus spp.	S												R
1082	9/30/2020	September	2020	Anesthesiology and Reanimation	ICU	negative	drainage_liquid	Escherichia coli	S	S		S	S		S	S	S			S		S	S
1089	9/4/2020	September	2020	Anesthesiology and Reanimation	ICU	negative	bronchoaspirate	Pseudomonas aeruginosa	S		S		S		S	S	S		S	S			S		S
1090	9/4/2020	September	2020	Anesthesiology and Reanimation	ICU	negative	bronchoaspirate	Staphylococcus haemolyticus													S	R	R		R
1091	9/4/2020	September	2020	Anesthesiology and Reanimation	ICU	negative	catheter_urine	Enterococcus faecalis	R		R	R			S							R			S
1116	9/7/2020	September	2020	Anesthesiology and Reanimation	ICU	positive	bronchoaspirate	Serratia marcescens	S		S	S	S		S	S	S		S	S		S	S	R	S
1117	9/7/2020	September	2020	Anesthesiology and Reanimation	ICU	negative	bronchoaspirate	Enterococcus faecalis							S							R
1118	9/7/2020	September	2020	Anesthesiology and Reanimation	ICU	negative	bronchoaspirate	Corynebacterium amycolatum													R				R
1119	9/7/2020	September	2020	Anesthesiology and Reanimation	ICU	negative	bronchoaspirate	Pseudomonas aeruginosa	S		S		S		S	S	S		S	S			S		S
1120	9/7/2020	September	2020	Anesthesiology and Reanimation	ICU	negative	catheter_urine	Enterococcus faecium							R							R			R
1148	10/1/2020	October	2020	Anesthesiology and Reanimation	ICU	negative	bronchoaspirate	Klebsiella pneumoniae	S	R	R	R	R		R	R	R			R		S	R		R
1149	10/1/2020	October	2020	Anesthesiology and Reanimation	ICU	negative	bronchoaspirate	Klebsiella pneumoniae	S	R	R	R	R		S	R	S			S		R	R		R
1158	10/10/2020	October	2020	Anesthesiology and Reanimation	ICU	negative	catheter_urine	Klebsiella pneumoniae	S	R	R	R	R		S	S	S			R		S	R		S
1162	10/11/2020	October	2020	Anesthesiology and Reanimation	ICU	negative	peritoneal_liquid	Staphylococcus epidermidis								R					S	R	R		R
1167	10/12/2020	October	2020	Anesthesiology and Reanimation	ICU	negative	bronchoaspirate	Stenotrophomonas maltophila														S
1168	10/12/2020	October	2020	Anesthesiology and Reanimation	ICU	negative	bronchoaspirate	Staphylococcus aureus								R						S	S
1169	10/12/2020	October	2020	Anesthesiology and Reanimation	ICU	negative	bronchus_lavage	Escherichia coli	S	S	S	S	S		S	R	S			R		R	S		R
1170	10/12/2020	October	2020	Anesthesiology and Reanimation	ICU	negative	surgical_wound	Pseudomonas aeruginosa	R			R	R		R	R	R			R		R	R		R
1171	10/12/2020	October	2020	Anesthesiology and Reanimation	ICU	negative	blood	Klebsiella oxytoca	S	R	S	S	S		S	R				R		R	S		R
1172	10/12/2020	October	2020	Anesthesiology and Reanimation	ICU	positive	catheter_urine	Escherichia coli	S	S	S	S	S		S	S	S			S		S	S		S
1191	10/15/2020	October	2020	Anesthesiology and Reanimation	ICU	positive	bronchoaspirate	Staphylococcus aureus								S						S			S
1192	10/15/2020	October	2020	Anesthesiology and Reanimation	ICU	negative	bronchoaspirate	Pseudomonas aeruginosa	S			R	R		S	S	S			R		R	S		S
1215	10/18/2020	October	2020	Anesthesiology and Reanimation	ICU	negative	surgical_wound	Klebsiella oxytoca	S	R	R	R	R		R	R	R			R		R	R		R
1222	10/19/2020	October	2020	Anesthesiology and Reanimation	ICU	positive	bronchoaspirate	Klebsiella pneumoniae	S	I	S	I	R		S	S	S			S		R	R		S
1223	10/19/2020	October	2020	Anesthesiology and Reanimation	ICU	positive	bronchoaspirate	Staphylococcus epidermidis								S					S	S	S		S
1224	10/19/2020	October	2020	Anesthesiology and Reanimation	ICU	negative	blood	Staphylococcus xylosus								R					S	S	S		R
1225	10/19/2020	October	2020	Anesthesiology and Reanimation	ICU	positive	catheter_urine	Escherichia coli	S	S	S	I	S		S	S	S			S		S	S		S
1226	10/19/2020	October	2020	Anesthesiology and Reanimation	ICU	positive	catheter_urine	Enterococcus faecalis								S					R	R	R		S
1232	10/2/2020	October	2020	Anesthesiology and Reanimation	ICU	negative	bronchoaspirate	Morganella morganii	S	S	S		I		I	R	S			S		R	R		R
1233	10/2/2020	October	2020	Anesthesiology and Reanimation	ICU	negative	venous_catheter	Klebsiella oxytoca	S	S			S		S	S	S			S		S	S		S
1245	10/21/2020	October	2020	Anesthesiology and Reanimation	ICU	negative	blood	Staphylococcus aureus								R					R	R	R		R
1254	10/22/2020	October	2020	Anesthesiology and Reanimation	ICU	positive	bronchoaspirate	Citrobacter freundii	S	S	S	S	S		S	S	S			S		S	S		S
1255	10/22/2020	October	2020	Anesthesiology and Reanimation	ICU	positive	bronchoaspirate	Escherichia coli	S	S	S	S	S		S	S	S			S		S	S		S
1256	10/22/2020	October	2020	Anesthesiology and Reanimation	ICU	positive	catheter_urine	Escherichia coli	I	R	R	R	I		S	S	S			S		S	S		S
1265	10/24/2020	October	2020	Anesthesiology and Reanimation	ICU	negative	bronchus_lavage	Escherichia coli	S	R	R	R	R		S	R	S			S		S	S		R
1266	10/24/2020	October	2020	Anesthesiology and Reanimation	ICU	positive	blood	Corynebacterium spp.																	S
1276	10/26/2020	October	2020	Anesthesiology and Reanimation	ICU	positive	bronchoaspirate	Serratia marcescens	S	S	S		S		S	S	S			S		S	S		S
1277	10/26/2020	October	2020	Anesthesiology and Reanimation	ICU	negative	bronchoaspirate	Acinetobacter baumanii/haemolyticus	S	R	R	R	R		R	R	R					I	R
1278	10/27/2020	October	2020	Anesthesiology and Reanimation	ICU	positive	bronchoaspirate	Stenotrophomonas maltophila														S
1279	10/27/2020	October	2020	Anesthesiology and Reanimation	ICU	positive	catheter_urine	Staphylococcus haemolyticus								S					S		S		S
1282	10/28/2020	October	2020	Anesthesiology and Reanimation	ICU	positive	venous_catheter	Staphylococcus epidermidis								R					R	S	R		R
1286	10/29/2020	October	2020	Anesthesiology and Reanimation	ICU	positive	bronchoaspirate	Pseudomonas aeruginosa	S		S	R	S		S	S	S			S		R	S		S
1287	10/29/2020	October	2020	Anesthesiology and Reanimation	ICU	positive	bronchoaspirate	Proteus mirabilis	S	S	S	S	S		S	S	S			S		S	S		S
1288	10/29/2020	October	2020	Anesthesiology and Reanimation	ICU	positive	blood	Staphylococcus epidermidis								S						S	S		S
1289	10/29/2020	October	2020	Anesthesiology and Reanimation	ICU	positive	catheter_urine	Enterococcus faecalis								R					R	R	R
1294	10/30/2020	October	2020	Anesthesiology and Reanimation	ICU	negative	venous_catheter	Staphylococcus epidermidis								R					S	R	R		R
1295	10/30/2020	October	2020	Anesthesiology and Reanimation	ICU	negative	venous_catheter	Staphylococcus hominis spp. hominis								S					S	S	S		S
1296	10/30/2020	October	2020	Anesthesiology and Reanimation	ICU	negative	venous_catheter	Staphylococcus epidermidis								S					I	S	S		S
1301	10/4/2020	October	2020	Anesthesiology and Reanimation	ICU	negative	surgical_wound	Streptococcus agalactiae (gr B)								R									R
1324	10/8/2020	October	2020	Anesthesiology and Reanimation	ICU	negative	bronchoaspirate	Pseudomonas aeruginosa	S	I	S	R	S		S	S	S			S		R	S		S
1325	10/8/2020	October	2020	Anesthesiology and Reanimation	ICU	negative	bronchoaspirate	Staphylococcus aureus								R					S	S	S		R
1337	11/1/2020	November	2020	Anesthesiology and Reanimation	ICU	positive	blood	Klebsiella oxytoca	S	S	S	S	S		S	S	S			S		S	S		S
1338	11/1/2020	November	2020	Anesthesiology and Reanimation	ICU	positive	blood	Staphylococcus epidermidis								S						S	S		S
1346	11/12/2020	November	2020	Anesthesiology and Reanimation	ICU	positive	bronchoaspirate	Pseudomonas aeruginosa	I	I	S	R	S		S	S	S			S			S		R
1347	11/12/2020	November	2020	Anesthesiology and Reanimation	ICU	positive	bronchoaspirate	Enterobacter cloacae	S	S	S	S	S		S	S	S			S		S	S		S
1348	11/12/2020	November	2020	Anesthesiology and Reanimation	ICU	positive	bronchoaspirate	Enterobacter cloacae	S	S	S	S	S		S	S	S			S		S	S		S
1349	11/12/2020	November	2020	Anesthesiology and Reanimation	ICU	negative	bronchoaspirate	Pseudomonas aeruginosa	R		R	R	R		R	R	R		R	R			R	S	R
1350	11/12/2020	November	2020	Anesthesiology and Reanimation	ICU	negative	bronchoaspirate	Pseudomonas aeruginosa	S	I	S	R	S		S	S	S			S			S		S
1351	11/12/2020	November	2020	Anesthesiology and Reanimation	ICU	positive	venous_catheter	Staphylococcus hominis								R						R	R		R
1357	11/13/2020	November	2020	Anesthesiology and Reanimation	ICU	negative	blood	Enterobacter aerogenes	S	S	S	S	S		S	S	S			S		S	S		S
1362	11/14/2020	November	2020	Anesthesiology and Reanimation	ICU	positive	venous_catheter	Staphylococcus hominis spp. hominis								S					S	S	S		S
1365	11/15/2020	November	2020	Anesthesiology and Reanimation	ICU	positive	catheter_urine	Escherichia coli	S	S	S	S	S		S	S	S		R	S		R	S	S	S
1366	11/15/2020	November	2020	Anesthesiology and Reanimation	ICU	negative	catheter_urine	Escherichia coli	S	R	R	R	R		S	R	S		R	S		S	S	S	R
1372	11/16/2020	November	2020	Anesthesiology and Reanimation	ICU	positive	bronchoaspirate	Klebsiella oxytoca	S	I	I	S	S		I	R	I			S		S	S		R
1373	11/16/2020	November	2020	Anesthesiology and Reanimation	ICU	positive	bronchoaspirate	Pseudomonas aeruginosa	S	I	S	R	S		S	S	S			S			S		S
1374	11/16/2020	November	2020	Anesthesiology and Reanimation	ICU	positive	bronchoaspirate	Stenotrophomonas maltophila														S
1375	11/16/2020	November	2020	Anesthesiology and Reanimation	ICU	positive	bronchoaspirate	Proteus mirabilis	S	S	S	S	S		S	S	S			S		S	S		S
1376	11/16/2020	November	2020	Anesthesiology and Reanimation	ICU	negative	bronchoaspirate	Citrobacter koseri	S	S	S	S	S		S	S	S			S		S	S		S
1377	11/16/2020	November	2020	Anesthesiology and Reanimation	ICU	positive	blood	Staphylococcus hominis spp. hominis								S					S	S	S		S
1384	11/17/2020	November	2020	Anesthesiology and Reanimation	ICU	positive	venous_catheter	Staphylococcus epidermidis								S					R	S	S		S
1389	11/18/2020	November	2020	Anesthesiology and Reanimation	ICU	positive	venous_catheter	Staphylococcus haemolyticus								R					S	R	R		R
1390	11/18/2020	November	2020	Anesthesiology and Reanimation	ICU	negative	venous_catheter	Staphylococcus hominis spp. hominis								S					R	I	R		S
1391	11/18/2020	November	2020	Anesthesiology and Reanimation	ICU	negative	venous_catheter	Staphylococcus hominis spp. hominis								S					S	S	S		S
1392	11/19/2020	November	2020	Anesthesiology and Reanimation	ICU	negative	bronchoaspirate	Pseudomonas aeruginosa	S			R	R		S	S	S			R			S		S
1393	11/19/2020	November	2020	Anesthesiology and Reanimation	ICU	positive	venous_catheter	Enterococcus faecalis													R	R	R
1395	11/2/2020	November	2020	Anesthesiology and Reanimation	ICU	positive	bronchoaspirate	Morganella morganii	S	S	S		S		S	S	S			S		S	S		S
1396	11/2/2020	November	2020	Anesthesiology and Reanimation	ICU	positive	bronchoaspirate	Stenotrophomonas maltophila														S
1397	11/2/2020	November	2020	Anesthesiology and Reanimation	ICU	negative	bronchoaspirate	Staphylococcus aureus								S					S	S	S		S
1398	11/2/2020	November	2020	Anesthesiology and Reanimation	ICU	negative	bronchoaspirate	Klebsiella oxytoca	S	S	S	S	S		S	S	S			S		S	S		S
1399	11/2/2020	November	2020	Anesthesiology and Reanimation	ICU	negative	blood	Staphylococcus epidermidis								R					I	R	R		R
1400	11/2/2020	November	2020	Anesthesiology and Reanimation	ICU	positive	catheter_urine	Enterobacter aerogenes	S	R	I	R	R		S	S	S			R		S	S		S
1401	11/2/2020	November	2020	Anesthesiology and Reanimation	ICU	positive	catheter_urine	Klebsiella pneumoniae	S	S	S	S	S		S	S	S			S		R	S		S
1407	11/20/2020	November	2020	Anesthesiology and Reanimation	ICU	positive	blood	Staphylococcus aureus								R					S	S	S		R
1413	11/21/2020	November	2020	Anesthesiology and Reanimation	ICU	positive	bronchoaspirate	Haemophilus influenzae			S				S		S			S
1414	11/21/2020	November	2020	Anesthesiology and Reanimation	ICU	positive	venous_catheter	Staphylococcus epidermidis								R					S	R	R		R
1422	11/23/2020	November	2020	Anesthesiology and Reanimation	ICU	positive	bronchoaspirate	Klebsiella pneumoniae	S	S	S	S	S		S	S	S			S		R	S		S
1423	11/23/2020	November	2020	Anesthesiology and Reanimation	ICU	positive	bronchoaspirate	Klebsiella oxytoca	S	S	S	S	S		S	S	S			S		R	S		S
1424	11/23/2020	November	2020	Anesthesiology and Reanimation	ICU	positive	bronchoaspirate	Citrobacter koseri	S	S	S	S	S		S	S	S			S		S	S		S
1425	11/23/2020	November	2020	Anesthesiology and Reanimation	ICU	positive	bronchoaspirate	Enterobacter cloacae	R	S	S	S	S		S	S	S			S		S	R		S
1426	11/23/2020	November	2020	Anesthesiology and Reanimation	ICU	positive	bronchoaspirate	Haemophilus influenzae			S				S		S			S
1427	11/23/2020	November	2020	Anesthesiology and Reanimation	ICU	negative	bronchoaspirate	Enterococcus faecalis													R	R	R
1428	11/23/2020	November	2020	Anesthesiology and Reanimation	ICU	positive	blood	Staphylococcus epidermidis								R					I	R	R		R
1429	11/23/2020	November	2020	Anesthesiology and Reanimation	ICU	positive	catheter_urine	Enterococcus faecalis								R					R	R	R		R
1430	11/23/2020	November	2020	Anesthesiology and Reanimation	ICU	positive	catheter_urine	Escherichia coli	S	R	R	R	I		S	S	S		R	S		S	S	S	S
1431	11/23/2020	November	2020	Anesthesiology and Reanimation	ICU	positive	catheter_urine	Enterococcus faecalis								S					S	R	R		S
1432	11/23/2020	November	2020	Anesthesiology and Reanimation	ICU	positive	catheter_urine	Klebsiella pneumoniae	S	R	R	R	R		S	R	S		R	S		I	S	S	S
1439	11/24/2020	November	2020	Anesthesiology and Reanimation	ICU	negative	bronchoaspirate	Klebsiella pneumoniae	S	S	S	S	S		S	S	S			S		S	S		S
1447	11/25/2020	November	2020	Anesthesiology and Reanimation	ICU	positive	sputum	Staphylococcus aureus								S					S	S	S		S
1448	11/25/2020	November	2020	Anesthesiology and Reanimation	ICU	positive	sputum	Pseudomonas aeruginosa	S	I	S	R	S		S	S	S			S			S		S
1449	11/25/2020	November	2020	Anesthesiology and Reanimation	ICU	positive	catheter_urine	Citrobacter koseri	S	S	S	S	S		S	S	S			S		S	S		S
1450	11/25/2020	November	2020	Anesthesiology and Reanimation	ICU	positive	catheter_urine	Klebsiella pneumoniae	S	S	S	S	S		S	S	S			S		S	S		S
1458	11/26/2020	November	2020	Anesthesiology and Reanimation	ICU	positive	bronchoaspirate	Staphylococcus aureus								R					S	S	R		R
1459	11/26/2020	November	2020	Anesthesiology and Reanimation	ICU	positive	bronchoaspirate	Klebsiella pneumoniae	S	S	S	S	S		S	S	S			S		S	S		S
1460	11/26/2020	November	2020	Anesthesiology and Reanimation	ICU	negative	bronchoaspirate	Proteus mirabilis	S	S	S	S	S		S	S	S			S		S	S		S
1461	11/26/2020	November	2020	Anesthesiology and Reanimation	ICU	negative	bronchoaspirate	Pseudomonas aeruginosa	S		S	R	S		S	S	S			S			S		S
1462	11/26/2020	November	2020	Anesthesiology and Reanimation	ICU	negative	bronchoaspirate	Proteus mirabilis	S	S	S	S	S		S	S	S			S		S	S		S
1463	11/26/2020	November	2020	Anesthesiology and Reanimation	ICU	negative	bronchoaspirate	Pseudomonas aeruginosa	S	I	S	R	S		S	S	S			S			S		S
1464	11/26/2020	November	2020	Anesthesiology and Reanimation	ICU	positive	catheter_urine	Proteus mirabilis	S	S	S	S	S		S	S	S			S		S	R		S
1478	11/3/2020	November	2020	Anesthesiology and Reanimation	ICU	negative	bronchoaspirate	Escherichia coli	S	S	S	S	S		S	S	S			S		S	S		S
1479	11/3/2020	November	2020	Anesthesiology and Reanimation	ICU	positive	venous_catheter	Staphylococcus hominis spp. hominis								S						S	S		S
1486	11/30/2020	November	2020	Anesthesiology and Reanimation	ICU	positive	bronchoaspirate	Pseudomonas aeruginosa	S		S	R	S		S	S	S			S			S		S
1487	11/30/2020	November	2020	Anesthesiology and Reanimation	ICU	negative	bronchoaspirate	Serratia marcescens	S	S	S		S		S	S	S			S		S	S		S
1488	11/30/2020	November	2020	Anesthesiology and Reanimation	ICU	negative	bronchoaspirate	Pseudomonas aeruginosa	S			R	S		S	R	S			S			R		R
1489	11/30/2020	November	2020	Anesthesiology and Reanimation	ICU	negative	bronchoaspirate	Pseudomonas aeruginosa	S	I	S	R	S		S	S	S			S			S		S
1490	11/30/2020	November	2020	Anesthesiology and Reanimation	ICU	negative	bronchoaspirate	Klebsiella pneumoniae	S	R	R	R	R		S	S	S			S		I	S		S
1491	11/30/2020	November	2020	Anesthesiology and Reanimation	ICU	positive	venous_catheter	Enterococcus faecium													R	R	R
1492	11/30/2020	November	2020	Anesthesiology and Reanimation	ICU	positive	blood	Staphylococcus epidermidis								S					S	S	S		S
1493	11/30/2020	November	2020	Anesthesiology and Reanimation	ICU	positive	catheter_urine	Enterococcus faecium								R					S	R	R		R
1494	11/30/2020	November	2020	Anesthesiology and Reanimation	ICU	positive	catheter_urine	Pseudomonas aeruginosa	S	I	S	R	S		S	S	S		S	S	R		S	S	S	R
1503	11/4/2020	November	2020	Anesthesiology and Reanimation	ICU	positive	bronchoaspirate	Pseudomonas aeruginosa	S	I		R	S		R	S	R			S		R	S		S
1509	11/5/2020	November	2020	Anesthesiology and Reanimation	ICU	positive	bronchoaspirate	Pseudomonas aeruginosa	S	I	S	R	S		S	S	S			S		R	S		S
1510	11/5/2020	November	2020	Anesthesiology and Reanimation	ICU	positive	bronchoaspirate	Enterobacter cloacae	S	S	S	S	S		S	S	S			S		S	S		S
1511	11/5/2020	November	2020	Anesthesiology and Reanimation	ICU	positive	bronchoaspirate	Enterobacter cloacae	S	S	S	S	S		S	S	S			S		S	S		S
1512	11/5/2020	November	2020	Anesthesiology and Reanimation	ICU	positive	bronchoaspirate	Klebsiella pneumoniae	S	R	R	R	R		S	S	S			S		I	S		S
1513	11/5/2020	November	2020	Anesthesiology and Reanimation	ICU	negative	bronchoaspirate	Enterobacter aerogenes	S	S	S	S	S		S	S	S			S		S	S		S
1514	11/5/2020	November	2020	Anesthesiology and Reanimation	ICU	positive	catheter_urine	Klebsiella oxytoca	S	S	S	S	S		S	S	S		S	S	R	S	S	S	S
1515	11/5/2020	November	2020	Anesthesiology and Reanimation	ICU	positive	catheter_urine	Escherichia coli	S	S	S	S	S		S	S	S		S	S	R	S	S	S	S
1516	11/5/2020	November	2020	Anesthesiology and Reanimation	ICU	positive	catheter_urine	Pseudomonas aeruginosa	S	I	S	R	S		S	S	S		S	S	R	R	S	S	S	R
1517	11/5/2020	November	2020	Anesthesiology and Reanimation	ICU	positive	catheter_urine	Providencia stuartii	S	S	S	S	S		S	R	S		S	S	R	I	S	R	R
1524	11/6/2020	November	2020	Anesthesiology and Reanimation	ICU	positive	catheter	Staphylococcus hominis spp. hominis								R					S	S	R		R
1525	11/6/2020	November	2020	Anesthesiology and Reanimation	ICU	positive	venous_catheter	Staphylococcus hominis spp. hominis								S					S	S	R		S
1526	11/6/2020	November	2020	Anesthesiology and Reanimation	ICU	positive	blood	Staphylococcus epidermidis								S					S	S	S		S
1534	11/7/2020	November	2020	Anesthesiology and Reanimation	ICU	positive	blood	Staphylococcus epidermidis								R					I	R	R		R
1541	11/9/2020	November	2020	Anesthesiology and Reanimation	ICU	positive	bronchoaspirate	Staphylococcus aureus								S					S	S	S		S
1542	11/9/2020	November	2020	Anesthesiology and Reanimation	ICU	positive	bronchoaspirate	Klebsiella pneumoniae	S	I	I	R	S		I	R	S			S		S	I		S
1543	11/9/2020	November	2020	Anesthesiology and Reanimation	ICU	positive	bronchoaspirate	Escherichia coli	S	S	S	S	S		S	S	S			S		R	S		S
1544	11/9/2020	November	2020	Anesthesiology and Reanimation	ICU	positive	bronchoaspirate	Klebsiella pneumoniae	S	S	S	S	S		S	S	S			S		S	S		S
1545	11/9/2020	November	2020	Anesthesiology and Reanimation	ICU	positive	bronchoaspirate	Proteus mirabilis	S	S	S	S	S		S	S	S			S		S	S		R
1546	11/9/2020	November	2020	Anesthesiology and Reanimation	ICU	positive	bronchoaspirate	Klebsiella pneumoniae	S	S	S	S	S		S	S	S			S		S	S		S
1547	11/9/2020	November	2020	Anesthesiology and Reanimation	ICU	positive	venous_catheter	Staphylococcus epidermidis								S					S	S	S		S
1548	11/9/2020	November	2020	Anesthesiology and Reanimation	ICU	positive	urine	Enterococcus faecalis								S					S	R	R		S
1549	11/9/2020	November	2020	Anesthesiology and Reanimation	ICU	positive	catheter_urine	Enterococcus faecalis								S					R	R	R		S
1550	11/9/2020	November	2020	Anesthesiology and Reanimation	ICU	positive	catheter_urine	Enterococcus faecalis								S					R	R	R		S
1551	11/9/2020	November	2020	Anesthesiology and Reanimation	ICU	positive	catheter_urine	Acinetobacter baumanii/haemolyticus	S	R		R				S	S				R	I	S
1552	11/9/2020	November	2020	Anesthesiology and Reanimation	ICU	negative	catheter_urine	Enterococcus faecium								R					S	R	R		R
1560	12/1/2020	December	2020	Anesthesiology and Reanimation	ICU	positive	blood	Staphylococcus aureus								S					S	S	R		S
1564	12/10/2020	December	2020	Anesthesiology and Reanimation	ICU	positive	bronchoaspirate	Klebsiella pneumoniae	S	R	R	R	R		S	S	S			S		I	S		S
1565	12/10/2020	December	2020	Anesthesiology and Reanimation	ICU	positive	bronchoaspirate	Enterobacter cloacae	S	S	S	S	S		S	S	S			S		S	R		S
1566	12/10/2020	December	2020	Anesthesiology and Reanimation	ICU	positive	bronchoaspirate	Enterobacter aerogenes	S	S	S	S	S		S	S	S			S		S	S		S
1567	12/10/2020	December	2020	Anesthesiology and Reanimation	ICU	positive	catheter_urine	Klebsiella oxytoca	S	S	S	S	S		S	S	S		S	S		S	S	S	S
1568	12/10/2020	December	2020	Anesthesiology and Reanimation	ICU	positive	catheter_urine	Enterococcus faecalis								R					R	R	R		R
1569	12/10/2020	December	2020	Anesthesiology and Reanimation	ICU	negative	catheter_urine	Klebsiella pneumoniae	S	R	R	R	R		S	S	S			S		I	S		S
1570	12/10/2020	December	2020	Anesthesiology and Reanimation	ICU	negative	catheter_urine	Enterococcus faecalis								S					R	R	R		S
1577	12/11/2020	December	2020	Anesthesiology and Reanimation	ICU	positive	bronchoaspirate	Klebsiella pneumoniae	S	S	S	S	S		S	S	S			S		S	S		S
1583	12/12/2020	December	2020	Anesthesiology and Reanimation	ICU	negative	catheter_urine	Escherichia coli	S	S	S	S	S		S	S	S		S	S		S	S	S	S
1586	12/13/2020	December	2020	Anesthesiology and Reanimation	ICU	positive	bronchoaspirate	Burkolderia cepacia	R								R						R		R
1592	12/14/2020	December	2020	Anesthesiology and Reanimation	ICU	negative	bronchoaspirate	Pseudomonas aeruginosa	S	I	S	R	S		S	S	S			S			S		S
1593	12/14/2020	December	2020	Anesthesiology and Reanimation	ICU	negative	bronchoaspirate	Pseudomonas aeruginosa	I		S	R	S		S	R	S			S			S		S
1594	12/14/2020	December	2020	Anesthesiology and Reanimation	ICU	positive	catheter_urine	Pseudomonas aeruginosa	S	I	S	R	S		S	S	S		S	S	R		R	S	S	R
1595	12/14/2020	December	2020	Anesthesiology and Reanimation	ICU	negative	catheter_urine	Enterobacter aerogenes	S	R	S	R	R		S	S	S		R	R		S	S	S	S
1601	12/15/2020	December	2020	Anesthesiology and Reanimation	ICU	negative	bronchus_lavage	Klebsiella oxytoca	S	R	S	S	I		S	R	S			S		S	S		R
1602	12/15/2020	December	2020	Anesthesiology and Reanimation	ICU	negative	bronchus_lavage	Escherichia coli	S	R	S	S	I		S	R	S			S		S	S		R
1603	12/15/2020	December	2020	Anesthesiology and Reanimation	ICU	positive	venous_catheter	Staphylococcus epidermidis								R					R	S	R		R
1617	12/17/2020	December	2020	Anesthesiology and Reanimation	ICU	positive	bronchoaspirate	Stenotrophomonas maltophila														S
1618	12/17/2020	December	2020	Anesthesiology and Reanimation	ICU	positive	bronchoaspirate	Klebsiella pneumoniae	R	R	R	R	R		R	R	R		R	R		R	S	S	R
1619	12/17/2020	December	2020	Anesthesiology and Reanimation	ICU	positive	catheter_urine	Enterococcus faecalis								R					R	R	R		R
1620	12/17/2020	December	2020	Anesthesiology and Reanimation	ICU	positive	catheter_urine	Enterococcus faecalis								S					R	R	R		S
1627	12/18/2020	December	2020	Anesthesiology and Reanimation	ICU	positive	bronchoaspirate	Klebsiella oxytoca	R	R	R	R	R		R	R	R		R	R		R	S	S	R
1646	12/21/2020	December	2020	Anesthesiology and Reanimation	ICU	positive	bronchoaspirate	Klebsiella pneumoniae	S	S	S	S	S		S	S	S			S		R	S		S
1647	12/21/2020	December	2020	Anesthesiology and Reanimation	ICU	positive	bronchoaspirate	Proteus mirabilis	S	S	S	S	S		S	S	S			S		S	S		S
1648	12/21/2020	December	2020	Anesthesiology and Reanimation	ICU	positive	bronchoaspirate	Enterobacter aerogenes	S	S	S	S	S		S	S	S			S		S	S		S
1649	12/21/2020	December	2020	Anesthesiology and Reanimation	ICU	positive	venous_catheter	Staphylococcus epidermidis								S					R	S	S		S
1664	12/23/2020	December	2020	Anesthesiology and Reanimation	ICU	positive	catheter_urine	Pseudomonas aeruginosa	R		R	R	R		R	R	R		S	S	R		R	S	R	R
1671	12/24/2020	December	2020	Anesthesiology and Reanimation	ICU	positive	bronchoaspirate	Klebsiella pneumoniae	S	R	R	R	R		S	S	S			S		I	S		S
1672	12/24/2020	December	2020	Anesthesiology and Reanimation	ICU	positive	bronchoaspirate	Pseudomonas aeruginosa	S		S	R	S		R	S	R			S			S		R
1673	12/24/2020	December	2020	Anesthesiology and Reanimation	ICU	positive	bronchoaspirate	Klebsiella pneumoniae	S	S	S	S	S		S	S	S			S		R	S		S
1674	12/24/2020	December	2020	Anesthesiology and Reanimation	ICU	positive	bronchoaspirate	Enterobacter cloacae	S	R	R	R	R		S	S	S			R		S	R		S
1675	12/24/2020	December	2020	Anesthesiology and Reanimation	ICU	positive	bronchoaspirate	Pseudomonas aeruginosa	R		R	R	R		R	R	R		R	R			R	S	R
1676	12/24/2020	December	2020	Anesthesiology and Reanimation	ICU	positive	bronchoaspirate	Stenotrophomonas maltophila														S
1677	12/24/2020	December	2020	Anesthesiology and Reanimation	ICU	positive	bronchoaspirate	Pseudomonas aeruginosa	S	I	S	R	S		S	S	S			S			S		S
1678	12/24/2020	December	2020	Anesthesiology and Reanimation	ICU	negative	bronchoaspirate	Klebsiella pneumoniae	S	R	R	R	R		S	S	S			R		R	S		S
1679	12/24/2020	December	2020	Anesthesiology and Reanimation	ICU	positive	rectal_tampon	Klebsiella pneumoniae	R	R	R	R	R		R	R	R			R		S	S		R
1680	12/24/2020	December	2020	Anesthesiology and Reanimation	ICU	positive	catheter_urine	Enterococcus faecalis								R					R	R	R		R
1681	12/24/2020	December	2020	Anesthesiology and Reanimation	ICU	positive	catheter_urine	Morganella morganii	R	R	R		R		I	R	I		S	S		S	R	R	R
1682	12/24/2020	December	2020	Anesthesiology and Reanimation	ICU	positive	catheter_urine	Enterococcus faecalis								I					R	R	R		I
1687	12/25/2020	December	2020	Anesthesiology and Reanimation	ICU	negative	bronchoaspirate	Pseudomonas aeruginosa	I		S	R	S		S	S	S			S			R		S
1688	12/25/2020	December	2020	Anesthesiology and Reanimation	ICU	negative	blood	Staphylococcus capitis								S					S	S	S		S
1689	12/25/2020	December	2020	Anesthesiology and Reanimation	ICU	negative	blood	Staphylococcus hominis spp. hominis								S					S	S	S		S
1691	12/26/2020	December	2020	Anesthesiology and Reanimation	ICU	positive	venous_catheter	Enterococcus faecium													R	R	R
1692	12/26/2020	December	2020	Anesthesiology and Reanimation	ICU	positive	urethra_secretion	Enterococcus spp.													R
1695	12/27/2020	December	2020	Anesthesiology and Reanimation	ICU	positive	bronchoaspirate	Klebsiella pneumoniae	S	R	R	R	R		I	S	R			R		I	R		S
1696	12/27/2020	December	2020	Anesthesiology and Reanimation	ICU	negative	blood	Staphylococcus epidermidis								R					I	S	R		R
1700	12/28/2020	December	2020	Anesthesiology and Reanimation	ICU	positive	bronchoaspirate	Pseudomonas aeruginosa	S	I	S	R	S		S	S	S			S			S		S
1701	12/28/2020	December	2020	Anesthesiology and Reanimation	ICU	positive	bronchoaspirate	Proteus mirabilis	S	S	S	S	S		S	S	S			S		S	R		S
1702	12/28/2020	December	2020	Anesthesiology and Reanimation	ICU	positive	bronchoaspirate	Enterobacter cloacae	S	S	S	S	S		S	S	S			S		S	S		S
1703	12/28/2020	December	2020	Anesthesiology and Reanimation	ICU	positive	bronchoaspirate	Pseudomonas aeruginosa	R			R	R		R	R	R			S			R		R
1704	12/28/2020	December	2020	Anesthesiology and Reanimation	ICU	positive	bronchoaspirate	Pseudomonas aeruginosa	S		S	R	S		S	S	S			S			S		S
1705	12/28/2020	December	2020	Anesthesiology and Reanimation	ICU	positive	bronchoaspirate	Enterococcus faecium													S	R	R
1706	12/28/2020	December	2020	Anesthesiology and Reanimation	ICU	positive	bronchoaspirate	Pseudomonas aeruginosa	S	I	S	R	S		S	S	S			S			S		S
1707	12/28/2020	December	2020	Anesthesiology and Reanimation	ICU	negative	bronchoaspirate	Pseudomonas aeruginosa	S		S	R	S		S	S	S		S	S			S	S	S
1708	12/28/2020	December	2020	Anesthesiology and Reanimation	ICU	positive	catheter_urine	Enterococcus faecalis								R					R	R	R		R
1709	12/28/2020	December	2020	Anesthesiology and Reanimation	ICU	positive	catheter_urine	Klebsiella pneumoniae	R	R	R	R	R		R	R	R		R	R		S	S	S	R
1717	12/29/2020	December	2020	Anesthesiology and Reanimation	ICU	negative	blood	Staphylococcus haemolyticus								R					S	R	R		R
1727	12/3/2020	December	2020	Anesthesiology and Reanimation	ICU	positive	bronchoaspirate	Enterobacter aerogenes	S	R	R	R	R		S	S	S			I		S	S		S
1728	12/3/2020	December	2020	Anesthesiology and Reanimation	ICU	positive	bronchoaspirate	Enterobacter cloacae	S	S	S	S	S		S	S	S			S		S	S		S
1736	12/31/2020	December	2020	Anesthesiology and Reanimation	ICU	positive	bronchoaspirate	Acinetobacter baumanii/haemolyticus	S	R		R				S	S					S	S
1737	12/31/2020	December	2020	Anesthesiology and Reanimation	ICU	positive	bronchoaspirate	Serratia marcescens	S	S	S		S		S	S	S			S		S	S		S
1738	12/31/2020	December	2020	Anesthesiology and Reanimation	ICU	positive	bronchoaspirate	Pseudomonas aeruginosa	R		R	R	R		R	R	R		S	S			R	S	R
1739	12/31/2020	December	2020	Anesthesiology and Reanimation	ICU	positive	bronchoaspirate	Serratia marcescens	S	I	S		R		S	S	S			S		S	S		S
1740	12/31/2020	December	2020	Anesthesiology and Reanimation	ICU	positive	bronchoaspirate	Pseudomonas aeruginosa	S	I		R	S		S	S	S			S			S		S
1741	12/31/2020	December	2020	Anesthesiology and Reanimation	ICU	positive	bronchoaspirate	Acinetobacter baumanii/haemolyticus	R	R		R			R	R	R					R	R
1742	12/31/2020	December	2020	Anesthesiology and Reanimation	ICU	positive	bronchoaspirate	Enterococcus faecalis													R	R	R
1743	12/31/2020	December	2020	Anesthesiology and Reanimation	ICU	negative	bronchoaspirate	Pseudomonas aeruginosa	S	I	S	R	S		S	S	S			S			S		S
1744	12/31/2020	December	2020	Anesthesiology and Reanimation	ICU	negative	bronchoaspirate	Serratia marcescens	S	I	S		S		S	S	S			S		S	S		S
1745	12/31/2020	December	2020	Anesthesiology and Reanimation	ICU	positive	venous_catheter	Enterococcus faecalis													R	R	R
1746	12/31/2020	December	2020	Anesthesiology and Reanimation	ICU	positive	catheter_urine	Escherichia coli	S	R	R	R	S		S	R	S		R	S		R	S	S	R
1750	12/4/2020	December	2020	Anesthesiology and Reanimation	ICU	positive	bile	Staphylococcus aureus								S					I	S	S		S
1753	12/5/2020	December	2020	Anesthesiology and Reanimation	ICU	positive	blood	Staphylococcus hominis spp. hominis								S					S	S	R		S
1758	12/6/2020	December	2020	Anesthesiology and Reanimation	ICU	positive	venous_catheter	Enterococcus faecalis													R	R	R
1763	12/7/2020	December	2020	Anesthesiology and Reanimation	ICU	positive	bronchoaspirate	Stenotrophomonas maltophila														S
1764	12/7/2020	December	2020	Anesthesiology and Reanimation	ICU	positive	bronchoaspirate	Klebsiella pneumoniae	S	S	S	R	S		S	S	S			S		S	S		S
1765	12/7/2020	December	2020	Anesthesiology and Reanimation	ICU	positive	bronchoaspirate	Escherichia coli	S	S	S	S	I		S	S	S			S		R	S		S
1766	12/7/2020	December	2020	Anesthesiology and Reanimation	ICU	positive	bronchoaspirate	Klebsiella oxytoca	S	S	S	S	I		S	S	S			S		R	S		S
1767	12/7/2020	December	2020	Anesthesiology and Reanimation	ICU	positive	venous_catheter	Enterococcus faecium													S	R	R
1768	12/7/2020	December	2020	Anesthesiology and Reanimation	ICU	positive	venous_catheter	Staphylococcus epidermidis								R					I	R	R		R
1769	12/7/2020	December	2020	Anesthesiology and Reanimation	ICU	positive	catheter_urine	Enterococcus faecium								R					R	R	R		R
1770	12/7/2020	December	2020	Anesthesiology and Reanimation	ICU	negative	catheter_urine	Enterococcus faecalis								R					R	R	R		R
1782	1/1/2021	January	2021	Anesthesiology and Reanimation	ICU	positive	venous_catheter	Staphylococcus epidermidis								R					S	R	R		R
1791	1/10/2021	January	2021	Anesthesiology and Reanimation	ICU	negative	blood	Pseudomonas aeruginosa	S	I	S	R	S		S	S	S			S			S		S
1805	1/11/2021	January	2021	Anesthesiology and Reanimation	ICU	positive	bronchoaspirate	Pseudomonas aeruginosa	S	I	S	R	S		S	S	S			S			S		S
1806	1/11/2021	January	2021	Anesthesiology and Reanimation	ICU	positive	bronchoaspirate	Klebsiella pneumoniae	S	R	R	R	R		S	S	S			I		R	I		S
1807	1/11/2021	January	2021	Anesthesiology and Reanimation	ICU	negative	bronchoaspirate	Enterobacter aerogenes	S	S	S	S	S		S	S	S			S		S	S		S
1808	1/11/2021	January	2021	Anesthesiology and Reanimation	ICU	positive	venous_catheter	Staphylococcus epidermidis								R					I	R	R		R
1809	1/11/2021	January	2021	Anesthesiology and Reanimation	ICU	positive	catheter_urine	Enterococcus faecalis								S					R	R	R		S
1815	1/12/2021	January	2021	Anesthesiology and Reanimation	ICU	negative	bronchoaspirate	Staphylococcus epidermidis								R					S	I	R		R
1816	1/12/2021	January	2021	Anesthesiology and Reanimation	ICU	negative	venous_catheter	Enterococcus faecalis													S	R	R
1817	1/12/2021	January	2021	Anesthesiology and Reanimation	ICU	negative	catheter_urine	Escherichia coli	S	S	S	S	S		S	S	S		S	S		S	S	S	S
1830	1/14/2021	January	2021	Anesthesiology and Reanimation	ICU	positive	bronchoaspirate	Pseudomonas aeruginosa	R			R	R		S	S	S			R			R		S
1831	1/14/2021	January	2021	Anesthesiology and Reanimation	ICU	negative	bronchoaspirate	Pseudomonas aeruginosa	I		R	R	R		S	S	S		R	R			R	S	S
1832	1/14/2021	January	2021	Anesthesiology and Reanimation	ICU	negative	bronchoaspirate	Klebsiella pneumoniae	S	I	I	R	I		S	S	S			S		R	I		S
1833	1/14/2021	January	2021	Anesthesiology and Reanimation	ICU	negative	bronchoaspirate	Pseudomonas aeruginosa	I	I	S	R	S		I	S	S			S			S		S
1834	1/14/2021	January	2021	Anesthesiology and Reanimation	ICU	negative	bronchoaspirate	Streptococcus pyogenes (gr A)			S	S		S		S	S				S	S				S
1838	1/15/2021	January	2021	Anesthesiology and Reanimation	ICU	negative	bronchoaspirate	Streptococcus pyogenes (gr A)			S	S		S		S	S				S	S				S
1839	1/15/2021	January	2021	Anesthesiology and Reanimation	ICU	negative	venous_catheter	Staphylococcus epidermidis								R					I	S	R		R
1840	1/15/2021	January	2021	Anesthesiology and Reanimation	ICU	positive	blood	Staphylococcus epidermidis								R					S	R	R		R
1845	1/16/2021	January	2021	Anesthesiology and Reanimation	ICU	negative	venous_catheter	Staphylococcus haemolyticus								R					R	R	R		R
1846	1/16/2021	January	2021	Anesthesiology and Reanimation	ICU	negative	venous_catheter	Enterococcus faecalis													R	R	R
1847	1/16/2021	January	2021	Anesthesiology and Reanimation	ICU	negative	venous_catheter	Staphylococcus epidermidis								R					I	S	R		R
1848	1/16/2021	January	2021	Anesthesiology and Reanimation	ICU	negative	blood	Staphylococcus epidermidis								R					I	R	R		R
1857	1/18/2021	January	2021	Anesthesiology and Reanimation	ICU	positive	bronchoaspirate	Acinetobacter baumanii/haemolyticus	R	R		R			R	R	R					R	R		R
1858	1/18/2021	January	2021	Anesthesiology and Reanimation	ICU	negative	bronchoaspirate	Enterococcus faecalis													R	R	R
1859	1/18/2021	January	2021	Anesthesiology and Reanimation	ICU	negative	bronchoaspirate	Pseudomonas aeruginosa	S		R	R	R		S	S	S		R	R			S	R	S
1860	1/18/2021	January	2021	Anesthesiology and Reanimation	ICU	positive	venous_catheter	Staphylococcus epidermidis								R					S	R	R		R
1861	1/18/2021	January	2021	Anesthesiology and Reanimation	ICU	negative	rectal_tampon	Klebsiella pneumoniae	R	R	R	R	R		R	R	R			R		S	S		R
1862	1/18/2021	January	2021	Anesthesiology and Reanimation	ICU	positive	catheter_urine	Staphylococcus cohnii spp. cohnii								R					R	S	R		R
1863	1/18/2021	January	2021	Anesthesiology and Reanimation	ICU	positive	catheter_urine	Enterococcus faecium								R					R	R	R		R
1866	1/19/2021	January	2021	Anesthesiology and Reanimation	ICU	positive	bronchoaspirate	Pseudomonas aeruginosa	I		S	R	S		S	S	S			R			R		S
1867	1/19/2021	January	2021	Anesthesiology and Reanimation	ICU	negative	blood	Enterococcus faecalis													R	R	R
1874	1/2/2021	January	2021	Anesthesiology and Reanimation	ICU	positive	drainage_liquid	Enterococcus faecalis													I	R	R
1880	1/20/2021	January	2021	Anesthesiology and Reanimation	ICU	positive	venous_catheter	Staphylococcus epidermidis								R					I	S	R		R
1881	1/20/2021	January	2021	Anesthesiology and Reanimation	ICU	negative	venous_catheter	Staphylococcus epidermidis								R					S	S	R		R
1882	1/20/2021	January	2021	Anesthesiology and Reanimation	ICU	negative	venous_catheter	Enterococcus faecium													R	R	R
1886	1/21/2021	January	2021	Anesthesiology and Reanimation	ICU	positive	bronchoaspirate	Proteus mirabilis	S	S	S	S	S		S	S	S			S		S	S		S
1887	1/21/2021	January	2021	Anesthesiology and Reanimation	ICU	positive	venous_catheter	Enterococcus faecalis													R	R	R
1894	1/22/2021	January	2021	Anesthesiology and Reanimation	ICU	positive	drainage_liquid	Staphylococcus epidermidis								R					I	R	R		R
1900	1/23/2021	January	2021	Anesthesiology and Reanimation	ICU	negative	bronchoaspirate	Staphylococcus aureus								S					S	S	R		S
1901	1/23/2021	January	2021	Anesthesiology and Reanimation	ICU	negative	bronchoaspirate	Staphylococcus aureus								R					S	S	S		R
1902	1/23/2021	January	2021	Anesthesiology and Reanimation	ICU	positive	venous_catheter	Staphylococcus epidermidis								R					S	R	R		R
1906	1/24/2021	January	2021	Anesthesiology and Reanimation	ICU	negative	venous_catheter	Morganella morganii	S	I	S		I		I	S	S			S		S	S		S
1907	1/24/2021	January	2021	Anesthesiology and Reanimation	ICU	negative	venous_catheter	Staphylococcus hominis spp. hominis								R					S	I	R		R
1912	1/25/2021	January	2021	Anesthesiology and Reanimation	ICU	positive	bronchoaspirate	Acinetobacter baumanii/haemolyticus	R	R		R			R	R	R					R	R		R
1913	1/25/2021	January	2021	Anesthesiology and Reanimation	ICU	positive	bronchoaspirate	Escherichia coli	S	S	S	S	S		S	S	S			S		S	S		S
1914	1/25/2021	January	2021	Anesthesiology and Reanimation	ICU	positive	bronchoaspirate	Enterobacter aerogenes	S	I	S	S	S		S	S	S			S		S	S		S
1915	1/25/2021	January	2021	Anesthesiology and Reanimation	ICU	negative	bronchoaspirate	Klebsiella pneumoniae	S	S	S	S	S		S	S	S			S		S	S		S
1916	1/25/2021	January	2021	Anesthesiology and Reanimation	ICU	negative	bronchoaspirate	Pseudomonas aeruginosa	S	I		R	R		S	S	S			R			S		S
1917	1/25/2021	January	2021	Anesthesiology and Reanimation	ICU	negative	bronchoaspirate	Proteus mirabilis	S	S	S	S	S		S	R	S			S		R	S		R
1918	1/25/2021	January	2021	Anesthesiology and Reanimation	ICU	negative	bronchoaspirate	Pseudomonas aeruginosa	S	I	S	R	S		S	S	S		S	S			S	S	S
1919	1/25/2021	January	2021	Anesthesiology and Reanimation	ICU	negative	bronchoaspirate	Klebsiella pneumoniae	S	R	R	R	R		S	S	S			S		S	S		S
1920	1/25/2021	January	2021	Anesthesiology and Reanimation	ICU	negative	bronchoaspirate	Escherichia coli	S	S	S	S	S		S	S	S			S		R	S		S
1921	1/25/2021	January	2021	Anesthesiology and Reanimation	ICU	negative	venous_catheter	Escherichia coli	S	S	S	S	S		S	S	S			S		R	S		S
1922	1/25/2021	January	2021	Anesthesiology and Reanimation	ICU	positive	catheter_urine	Enterococcus faecium								R					R	R	R		R
1923	1/25/2021	January	2021	Anesthesiology and Reanimation	ICU	negative	catheter_urine	Enterococcus faecalis								S					S	R	R		S
1924	1/25/2021	January	2021	Anesthesiology and Reanimation	ICU	negative	catheter_urine	Escherichia coli	S	S	S	S	S		S	S	S		S	S		S	S	S	S
1925	1/25/2021	January	2021	Anesthesiology and Reanimation	ICU	negative	catheter_urine	Acinetobacter baumanii/haemolyticus	I	R		R				S	S				R	R	S
1930	1/26/2021	January	2021	Anesthesiology and Reanimation	ICU	positive	bronchus_lavage	Pseudomonas aeruginosa	I		R	R	R		S	S	S		R	R			S	S	S
1937	1/28/2021	January	2021	Anesthesiology and Reanimation	ICU	negative	bronchoaspirate	Klebsiella pneumoniae	S	R	R	R	R		S	R	S			R		R	S		R
1938	1/28/2021	January	2021	Anesthesiology and Reanimation	ICU	positive	catheter_urine	Klebsiella pneumoniae	S	R	R	R	R		S	S	S		R	I		S	I	S	S
1944	1/3/2021	January	2021	Anesthesiology and Reanimation	ICU	positive	venous_catheter	Enterococcus faecalis													R	R	R
1950	1/4/2021	January	2021	Anesthesiology and Reanimation	ICU	positive	bronchoaspirate	Pseudomonas aeruginosa	S	I	S	R	S		S	S	S			S			S		S
1951	1/4/2021	January	2021	Anesthesiology and Reanimation	ICU	positive	bronchoaspirate	Pseudomonas aeruginosa	S	I	S	R	S		S	S	S			S			S		S
1952	1/4/2021	January	2021	Anesthesiology and Reanimation	ICU	positive	blood	Staphylococcus epidermidis								R					S	R	R		R
1953	1/4/2021	January	2021	Anesthesiology and Reanimation	ICU	positive	catheter_urine	Escherichia coli	S	S	S	I	S		S	S	S		R	S		R	S	S	S
1957	1/5/2021	January	2021	Anesthesiology and Reanimation	ICU	positive	venous_catheter	Enterococcus faecium													R	R	R
1958	1/5/2021	January	2021	Anesthesiology and Reanimation	ICU	positive	rectal_tampon	Klebsiella pneumoniae	S	R	R	R	R		I	S	R			R		S	S		S
1959	1/5/2021	January	2021	Anesthesiology and Reanimation	ICU	positive	urine	Enterococcus faecalis								R					R	R	R		R
1966	1/6/2021	January	2021	Anesthesiology and Reanimation	ICU	positive	bronchoaspirate	Klebsiella pneumoniae	S	R	R	R	R		R	S	R		R	R		S	S	R	S
1967	1/6/2021	January	2021	Anesthesiology and Reanimation	ICU	positive	bronchoaspirate	Acinetobacter baumanii/haemolyticus	R	R		R			R	R	R					R	R		R
1968	1/6/2021	January	2021	Anesthesiology and Reanimation	ICU	positive	sputum	Staphylococcus aureus								R					S	S	S		R
1969	1/6/2021	January	2021	Anesthesiology and Reanimation	ICU	positive	sputum	Klebsiella pneumoniae	S	S	S	S	S		S	S	S			S		S	S		S
1970	1/6/2021	January	2021	Anesthesiology and Reanimation	ICU	positive	blood	Enterococcus faecalis													S	R	R
1975	1/7/2021	January	2021	Anesthesiology and Reanimation	ICU	positive	bronchoaspirate	Klebsiella pneumoniae	S	S	S	S	S		S	S	S			S		S	S		S
1976	1/7/2021	January	2021	Anesthesiology and Reanimation	ICU	positive	bronchoaspirate	Klebsiella pneumoniae	S	I	I	R	R		S	S	S			R		R	I		S
1977	1/7/2021	January	2021	Anesthesiology and Reanimation	ICU	positive	bronchoaspirate	Enterobacter aerogenes	S	S	S	S	S		S	S	S			S		S	S		S
1978	1/7/2021	January	2021	Anesthesiology and Reanimation	ICU	positive	catheter_urine	Enterococcus faecalis								R					R	R	R		R
1979	1/7/2021	January	2021	Anesthesiology and Reanimation	ICU	positive	catheter_urine	Klebsiella pneumoniae	S	S	S	S	S		S	S	S		R	S		S	S	S	S
1980	1/7/2021	January	2021	Anesthesiology and Reanimation	ICU	negative	catheter_urine	Klebsiella oxytoca	S	S	S	S	S		S	S	S			S		S	S		S
1981	1/7/2021	January	2021	Anesthesiology and Reanimation	ICU	negative	catheter_urine	Enterococcus faecalis								R					R	R	R		R
2000	1/9/2021	January	2021	Anesthesiology and Reanimation	ICU	positive	pus	Staphylococcus epidermidis								R					I	R	R		R
65	4/14/2020	April	2020	Diabetology	Medicine	positive	urine	Klebsiella pneumoniae spp pneumoniae	R		R	R	R	R	R	R	R			R		S	R		R
87	4/18/2020	April	2020	Diabetology	Medicine	positive	urine	Pseudomonas aeruginosa			S		R		S		S			S			S		S
97	4/2/2020	April	2020	Diabetology	Medicine	positive	blood	Staphylococcus epidermidis													S	I	R		R
109	4/20/2020	April	2020	Diabetology	Medicine	positive	blood	Staphylococcus hominis													S	S	S		S
125	4/24/2020	April	2020	Diabetology	Medicine	negative	blood	Escherichia coli	I		R	R	R		S	R	S		R	I		S	S		R
126	4/24/2020	April	2020	Diabetology	Medicine	positive	catheter_urine	Enterococcus faecalis							S							R			R
131	4/25/2020	April	2020	Diabetology	Medicine	positive	catheter_urine	Pseudomonas aeruginosa	S		S		S		S	S	S		S	S			S		S
158	4/30/2020	April	2020	Diabetology	Medicine	positive	urine	Proteus mirabilis			S	S	S				S			S		S	S		S
159	4/30/2020	April	2020	Diabetology	Medicine	positive	urine	Enterococcus faecalis							S							R			S
192	4/7/2020	April	2020	Diabetology	Medicine	negative	venous_catheter	Gemella morbillorum													S		S		S
223	5/13/2020	May	2020	Diabetology	Medicine	negative	pus	Enterobacter cloacae	S		S	S	S		S	S	S		S	S		S	S		S
224	5/13/2020	May	2020	Diabetology	Medicine	negative	pus	Staphylococcus lugdunensis													S	S	S		S
225	5/13/2020	May	2020	Diabetology	Medicine	negative	pus	Staphylococcus simulans													S	S	S		S
340	5/7/2020	May	2020	Diabetology	Medicine	negative	pus	Enterococcus faecalis							S							R
480	6/8/2020	June	2020	Diabetology	Medicine	negative	urine	Klebsiella oxytoca			S	S	S		S		S			S		S	S		S
481	6/8/2020	June	2020	Diabetology	Medicine	negative	urine	Escherichia coli			S	S	S		S		S			S		S	S		S
957	9/16/2020	September	2020	Diabetology	Medicine	negative	ascites	Pseudomonas aeruginosa	S		S		S		S	S	S		S	S			S		S
990	9/2/2020	September	2020	Diabetology	Medicine	negative	cutaneous_lesion	Morganella morganii	S		S	S	S		I	S	S			S		S	S	R	S
1180	10/13/2020	October	2020	Diabetology	Medicine	negative	pus	Proteus mirabilis	S	S	S	S	S		I	S	S			S		R	S		S
1204	10/16/2020	October	2020	Diabetology	Medicine	positive	blood	Staphylococcus auricularis								R					S	S	S		R
1234	10/2/2020	October	2020	Diabetology	Medicine	negative	ascites	Pseudomonas aeruginosa	S	I	S	R	S		S	S	S			S		R	S		S
1235	10/2/2020	October	2020	Diabetology	Medicine	negative	ascites	Staphylococcus aureus								R					S	S	S		R
1246	10/21/2020	October	2020	Diabetology	Medicine	positive	pus	Staphylococcus epidermidis								R					S	S	S		R
1247	10/21/2020	October	2020	Diabetology	Medicine	positive	pus	Enterococcus avium													R
1283	10/28/2020	October	2020	Diabetology	Medicine	negative	pus	Staphylococus schleiferi spp. schleiferi								S					R	S	R		S
1903	1/23/2021	January	2021	Diabetology	Medicine	positive	catheter_urine	Enterococcus faecalis								R					R	R	R		R
1908	1/24/2021	January	2021	Diabetology	Medicine	positive	blood	Staphylococcus aureus								R					S	S	S		R
5	3/26/2020	March	2020	Geriatric	Medicine	negative	sputum	Pseudomonas stutzeri	S		S		S		S	S	S		S	S			S		S
36	4/10/2020	April	2020	Geriatric	Medicine	positive	blood	Enterococcus faecalis							S							R
89	4/19/2020	April	2020	Geriatric	Medicine	negative	blood	Staphylococcus aureus													R	S	S		S
90	4/19/2020	April	2020	Geriatric	Medicine	negative	urine	Escherichia coli			S	S	S		S		S			S		R	S		S
135	4/26/2020	April	2020	Geriatric	Medicine	positive	blood	Staphylococcus epidermidis													S	S	R		R
199	4/9/2020	April	2020	Geriatric	Medicine	positive	pharynx	Pseudomonas aeruginosa	S		S		S		S	S	S		S	S			S		S
255	5/20/2020	May	2020	Geriatric	Medicine	negative	blood	Staphylococcus capitis													S	R	R		R
360	6/1/2020	June	2020	Geriatric	Medicine	negative	urine	Proteus mirabilis			R	S	S				S			S		S	R		S
367	6/10/2020	June	2020	Geriatric	Medicine	positive	sputum	Staphylococcus aureus													S	S	S		S
370	6/11/2020	June	2020	Geriatric	Medicine	negative	catheter_urine	Escherichia coli	S		I	R	I		S	R	S		R	S		S	S		R
389	6/17/2020	June	2020	Geriatric	Medicine	negative	catheter_urine	Enterococcus faecalis							S							R			R
390	6/17/2020	June	2020	Geriatric	Medicine	negative	catheter_urine	Citrobacter freundii	S		S	R	R		S	S	S		R	I		S	S		S
423	6/25/2020	June	2020	Geriatric	Medicine	negative	blood	Escherichia coli	S		R	R	R		S	R	S		R	S		S	R		R
442	6/29/2020	June	2020	Geriatric	Medicine	negative	rectal_tampon	Klebsiella pneumoniae spp pneumoniae	S		R	R	R	R	R	R	R		R	R		R	I		R
443	6/29/2020	June	2020	Geriatric	Medicine	negative	catheter_urine	Escherichia coli	S		S	S	S		S	S	S		S	S		S	S		S
463	6/5/2020	June	2020	Geriatric	Medicine	negative	urine	Proteus mirabilis			S	R	R				S			S		R	R		R
468	6/6/2020	June	2020	Geriatric	Medicine	negative	urine	Proteus mirabilis			S	S	S				S			S		S	S		I
469	6/6/2020	June	2020	Geriatric	Medicine	negative	urine	Pseudomonas aeruginosa			R		S		S		S			S			S		R
487	7/1/2020	July	2020	Geriatric	Medicine	negative	urine	Enterococcus faecalis							S							R			S
488	7/1/2020	July	2020	Geriatric	Medicine	negative	urine	Escherichia coli			S	S	S		S		S			S		S	S		S
522	7/16/2020	July	2020	Geriatric	Medicine	negative	blood	Staphylococcus aureus													S	S	S		R
547	7/19/2020	July	2020	Geriatric	Medicine	negative	blood	Staphylococcus epidermidis													R	S	S		S
548	7/19/2020	July	2020	Geriatric	Medicine	negative	catheter_urine	Enterococcus faecium							R							R			R
556	7/2/2020	July	2020	Geriatric	Medicine	negative	urine	Proteus mirabilis			S	I	S				S			S		R	R		R
573	7/21/2020	July	2020	Geriatric	Medicine	negative	urine	Klebsiella pneumoniae spp pneumoniae	S		R	R	R	R	R	R	I			R		R	R		R
588	7/23/2020	July	2020	Geriatric	Medicine	negative	urine	Escherichia coli			S	S	S		S		S			S		S	S		S
589	7/23/2020	July	2020	Geriatric	Medicine	negative	urine	Proteus mirabilis			S	S	S				S			S		S	S		S
590	7/23/2020	July	2020	Geriatric	Medicine	negative	catheter_urine	Klebsiella oxytoca	S		S	S	S		S	S	S		S	S		S	S		S
591	7/23/2020	July	2020	Geriatric	Medicine	negative	catheter_urine	Escherichia coli	S		S	S	S		S	S	S		S	S		S	S		S
610	7/27/2020	July	2020	Geriatric	Medicine	negative	venous_catheter	Staphylococcus haemolyticus													S	R	R		R
611	7/27/2020	July	2020	Geriatric	Medicine	negative	blood	Staphylococcus epidermidis													I	R	S		R
612	7/27/2020	July	2020	Geriatric	Medicine	negative	urine	Proteus mirabilis			S	S	S				S			S		S	R		S
636	7/29/2020	July	2020	Geriatric	Medicine	negative	blood	Staphylococcus hominis													S	S	R		R
637	7/29/2020	July	2020	Geriatric	Medicine	positive	urine	Escherichia coli			S	S	S		S		S			S		S	S		S
668	7/5/2020	July	2020	Geriatric	Medicine	negative	urine	Klebsiella pneumoniae spp pneumoniae	S		R	R	R	R	S	R	I			R		S	R		R
675	7/6/2020	July	2020	Geriatric	Medicine	negative	blood	Enterococcus faecium							R							R
676	7/6/2020	July	2020	Geriatric	Medicine	negative	blood	Staphylococcus epidermidis													S	R	R		R
710	8/10/2020	August	2020	Geriatric	Medicine	negative	urine	Escherichia coli			S	S	S		S		S			S		S	S		S
811	8/22/2020	August	2020	Geriatric	Medicine	negative	urine	Escherichia coli			S	S	S		S		S			S		S	S		S
812	8/22/2020	August	2020	Geriatric	Medicine	negative	urine	Enterococcus faecalis							S							R			S
825	8/24/2020	August	2020	Geriatric	Medicine	positive	blood	Staphylococcus capitis													S	S	R		R
826	8/24/2020	August	2020	Geriatric	Medicine	negative	catheter_urine	Escherichia coli	S		S	S	S		S	S	S		R	S		R	S		I
830	8/25/2020	August	2020	Geriatric	Medicine	positive	urine	Enterococcus faecalis							R							R			R
831	8/25/2020	August	2020	Geriatric	Medicine	positive	urine	Acinetobacter baumanii							R		R					R	R		R
832	8/25/2020	August	2020	Geriatric	Medicine	negative	urine	Klebsiella pneumoniae spp pneumoniae	S		R	R	R	R	R	R	R			R		R	R		R
833	8/25/2020	August	2020	Geriatric	Medicine	negative	catheter_urine	Pseudomonas aeruginosa	S		S		S		S	S	S		S	S			S		S
864	8/30/2020	August	2020	Geriatric	Medicine	negative	blood	Staphylococcus aureus													S	S	S		R
865	8/30/2020	August	2020	Geriatric	Medicine	positive	urine	Pseudomonas aeruginosa			S		S		S		S			S			S		S
879	8/31/2020	August	2020	Geriatric	Medicine	negative	urine	Enterococcus faecalis							S							R			R
880	8/31/2020	August	2020	Geriatric	Medicine	negative	urine	Klebsiella pneumoniae spp pneumoniae	S		R		R	R	R	R	I			R		R	R		R
918	9/1/2020	September	2020	Geriatric	Medicine	negative	urine	Streptococcus agalactiae (gr B)							S	R					S		R			S
919	9/1/2020	September	2020	Geriatric	Medicine	negative	catheter_urine	Enterococcus faecalis							S							R			S
920	9/1/2020	September	2020	Geriatric	Medicine	negative	catheter_urine	Proteus mirabilis	S		S	S	S			R	S		R	S		R	R	R	R
942	9/14/2020	September	2020	Geriatric	Medicine	negative	urine	Enterococcus faecalis							S							R			R
943	9/14/2020	September	2020	Geriatric	Medicine	negative	urine	Escherichia coli			R	S	S		S		I			S		S	S		S
944	9/14/2020	September	2020	Geriatric	Medicine	negative	urine	Proteus mirabilis			S	S	S				S			S		S	R		S
945	9/14/2020	September	2020	Geriatric	Medicine	negative	catheter_urine	Escherichia coli	S		S	S	S		S	S	S		S	S		S	S	R	S
947	9/15/2020	September	2020	Geriatric	Medicine	negative	urine	Proteus mirabilis			S	S	S				S			S		S	R		S
958	9/16/2020	September	2020	Geriatric	Medicine	negative	blood	Klebsiella pneumoniae spp pneumoniae	S		R	R	R		S	R	S		R	S		S	S		R
970	9/18/2020	September	2020	Geriatric	Medicine	negative	urine	Enterococcus faecium							R							R			R
1002	9/21/2020	September	2020	Geriatric	Medicine	negative	urine	Enterococcus faecalis							S							R			S
1019	9/23/2020	September	2020	Geriatric	Medicine	positive	urine	Acinetobacter baumanii	R						R	R	R					R	R		R
1020	9/23/2020	September	2020	Geriatric	Medicine	negative	catheter_urine	Proteus mirabilis	S		R	R	R			R	S		R	S		R	R	R	R
1031	9/24/2020	September	2020	Geriatric	Medicine	negative	vaginal_secretion	Mycoplasma hominis								R					R				R
1039	9/25/2020	September	2020	Geriatric	Medicine	positive	urine	Pseudomonas aeruginosa			S		S		S		S			S			S		S
1040	9/25/2020	September	2020	Geriatric	Medicine	negative	urine	Proteus mirabilis			S	S	S				S			S		S	R		S
1041	9/25/2020	September	2020	Geriatric	Medicine	negative	urine	Enterococcus spp.							R							R			R
1065	9/28/2020	September	2020	Geriatric	Medicine	positive	urine	Klebsiella pneumoniae spp pneumoniae			R	R	R		R		R			R		R	R		R
1092	9/4/2020	September	2020	Geriatric	Medicine	positive	blood	Acinetobacter baumanii	R						R	R	R					R	R		R
1135	9/9/2020	September	2020	Geriatric	Medicine	negative	urine	Escherichia coli			I	S	S		S		S			R		S	S		S
1150	10/1/2020	October	2020	Geriatric	Medicine	negative	catheter_urine	Escherichia coli	S	S	S	S	S		S	S	S		S	S	R	S	S	S	S
1173	10/12/2020	October	2020	Geriatric	Medicine	negative	catheter_urine	Escherichia coli	S	S	S	S	I		S	S	S			S		S	S		S
1188	10/14/2020	October	2020	Geriatric	Medicine	negative	urine	Enterococcus faecalis								R					R	R	R
1189	10/14/2020	October	2020	Geriatric	Medicine	negative	urine	Pseudomonas aeruginosa	S	I	S	R	S		S	S	S		S	S	R	R	S	R	S	R
1205	10/16/2020	October	2020	Geriatric	Medicine	negative	bronchoaspirate	Pseudomonas aeruginosa	S	I	S	R	S		S	S	S			S		R	S		S
1217	10/18/2020	October	2020	Geriatric	Medicine	positive	urine	Acinetobacter baumanii/haemolyticus	R	R	R	R	R		R	R	R				R	R	R			R
1218	10/18/2020	October	2020	Geriatric	Medicine	positive	urine	Enterobacter aerogenes	S	R	R	R	R		R	R	R		R	R	R	R	S	S	R
1227	10/19/2020	October	2020	Geriatric	Medicine	positive	blood	Staphylococcus aureus								R					S	S	R		R
1228	10/19/2020	October	2020	Geriatric	Medicine	positive	catheter_urine	Escherichia coli	S	S	S	S	S		S	R	S			S		R	S		R
1229	10/19/2020	October	2020	Geriatric	Medicine	negative	catheter_urine	Klebsiella pneumoniae	S	R	R	R	R		S	S	S			S		S	S		S
1236	10/2/2020	October	2020	Geriatric	Medicine	negative	surgical_wound	Morganella morganii	S	S	S		R		I	R	S			S		S	S		R
1237	10/2/2020	October	2020	Geriatric	Medicine	negative	urine	Klebsiella pneumoniae	S	R	R	R	R		I	R	R		R	R	R	S	R	S	R
1238	10/2/2020	October	2020	Geriatric	Medicine	negative	catheter_urine	Enterococcus faecium								R					R	R	R
1242	10/20/2020	October	2020	Geriatric	Medicine	negative	urine	Escherichia coli	S	S	S	S	S		S	S	S		S	S	R	R	S	S	S
1257	10/22/2020	October	2020	Geriatric	Medicine	positive	sputum	Pseudomonas aeruginosa	I	S	S	R	S		S	S	S			S		R	R		S
1258	10/22/2020	October	2020	Geriatric	Medicine	positive	sputum	Staphylococcus aureus								S					S	S	R		S
1259	10/22/2020	October	2020	Geriatric	Medicine	positive	catheter_urine	Pseudomonas aeruginosa	S			R	S		S	R	S			S		R	S		R
1267	10/24/2020	October	2020	Geriatric	Medicine	positive	urine	Escherichia coli	I	R	R	R	R		S	R	S		R	S	R	R	S	S	R
1284	10/28/2020	October	2020	Geriatric	Medicine	positive	blood	Enterococcus faecalis													R	R	R
1290	10/29/2020	October	2020	Geriatric	Medicine	positive	blood	Staphylococcus epidermidis								S					S	S	S		S
1311	10/6/2020	October	2020	Geriatric	Medicine	positive	urine	Acinetobacter baumanii/haemolyticus	R	R	R	R	R		R	R	R				R	R	R			R
1326	10/8/2020	October	2020	Geriatric	Medicine	negative	urine	Klebsiella pneumoniae	S	S	S	S	S		S	R	S		R	S	R	I	R	S	R
1327	10/8/2020	October	2020	Geriatric	Medicine	negative	urine	Morganella morganii	S	S	S		S		S	S	S		S	S	R	S	S	R	S
1341	11/10/2020	November	2020	Geriatric	Medicine	positive	venous_catheter	Staphylococcus haemolyticus								R					S	R	R		R
1342	11/10/2020	November	2020	Geriatric	Medicine	positive	catheter_urine	Enterobacter aerogenes	S	R	R	R	R		I	S	R		R	R		R	S	S	R
1352	11/12/2020	November	2020	Geriatric	Medicine	positive	bronchoaspirate	Acinetobacter baumanii/haemolyticus	R	R		R			R	R	R					R	R
1379	11/16/2020	November	2020	Geriatric	Medicine	positive	blood	Staphylococcus haemolyticus								R					R	R	R		R
1385	11/17/2020	November	2020	Geriatric	Medicine	positive	catheter_urine	Enterococcus faecalis								R					R	R	R		R
1394	11/19/2020	November	2020	Geriatric	Medicine	positive	catheter_urine	Escherichia coli	S	S	S	S	S		S	S	S		R	S		R	R	S	S
1402	11/2/2020	November	2020	Geriatric	Medicine	positive	blood	Staphylococcus epidermidis								R					S	R	R		R
1442	11/24/2020	November	2020	Geriatric	Medicine	positive	blood	Staphylococcus epidermidis								R					R	S	S		R
1443	11/24/2020	November	2020	Geriatric	Medicine	positive	blood	Staphylococcus hominis spp. hominis								R					S	S	S		R
1444	11/24/2020	November	2020	Geriatric	Medicine	positive	urine	Pseudomonas aeruginosa	S		S	R	S		I	S				S			S	S	S
1466	11/26/2020	November	2020	Geriatric	Medicine	positive	catheter_urine	Enterococcus faecium								R					S	R	R		R
1571	12/10/2020	December	2020	Geriatric	Medicine	positive	urine	Klebsiella pneumoniae	S		R	R	R		S	R		R		S		R	S	S	R
1572	12/10/2020	December	2020	Geriatric	Medicine	positive	catheter_urine	Escherichia coli	S	S	I	S	S		S	R	S		R	S		R	R	S	R
1605	12/15/2020	December	2020	Geriatric	Medicine	positive	urine	Pseudomonas aeruginosa	R		R	R	R		R	R	R		R	R			R	S	R
1637	12/2/2020	December	2020	Geriatric	Medicine	positive	urine	Enterococcus faecalis								S					R	R	R		S
1638	12/2/2020	December	2020	Geriatric	Medicine	positive	urine	Escherichia coli	S		S	S	S		S	S		S		S		S	S	S	S
1650	12/21/2020	December	2020	Geriatric	Medicine	positive	rectal_tampon	Klebsiella pneumoniae	S	R	R	R	R		R	R	R			R		R	S		R
1651	12/21/2020	December	2020	Geriatric	Medicine	positive	urine	Pseudomonas aeruginosa	R		R	R	R		R	R	R		R	R			R	R	R
1652	12/21/2020	December	2020	Geriatric	Medicine	positive	urine	Citrobacter koseri	S		S	S	S		S	S		S		S		S	S	S	S
1697	12/27/2020	December	2020	Geriatric	Medicine	positive	urine	Pseudomonas aeruginosa	R		R	R	R		R	R				R			R	R	R
1710	12/28/2020	December	2020	Geriatric	Medicine	positive	urine	Pseudomonas aeruginosa	S		S	R	S		S	S				S			S	S	S
1729	12/3/2020	December	2020	Geriatric	Medicine	positive	ascites	Klebsiella pneumoniae	S	R	R	R	R		S	R	S			R		R	S		R
1730	12/3/2020	December	2020	Geriatric	Medicine	positive	ascites	Escherichia coli	S	R	R	R	R		S	R	S			S		R	R		R
1751	12/4/2020	December	2020	Geriatric	Medicine	positive	urine	Staphylococcus epidermidis								S					S	S	S		S
1754	12/5/2020	December	2020	Geriatric	Medicine	positive	urine	Escherichia coli	S		S	S	I		S	S		S		S		S	S	S	S
1795	1/10/2021	January	2021	Geriatric	Medicine	positive	urine	Klebsiella pneumoniae	S		S	S	S		S	S		S		S		S	S	S	S
1796	1/10/2021	January	2021	Geriatric	Medicine	positive	urine	Escherichia coli	S		S	S	S		S	S		S		S		S	R	S	S
1841	1/15/2021	January	2021	Geriatric	Medicine	positive	urine	Enterococcus faecalis								S					R	R	R		S
1842	1/15/2021	January	2021	Geriatric	Medicine	positive	catheter_urine	Klebsiella pneumoniae	S	R	S	S	S		S	S	S		R	S		S	S	R	S
1852	1/17/2021	January	2021	Geriatric	Medicine	positive	blood	Staphylococcus epidermidis								S					S	S	S		S
1868	1/19/2021	January	2021	Geriatric	Medicine	positive	urine	Enterococcus faecalis								R					R	R	R		R
1875	1/2/2021	January	2021	Geriatric	Medicine	positive	urine	Enterobacter aerogenes	S		R	R	R		S	S		I		R		R	S	S	R
1904	1/23/2021	January	2021	Geriatric	Medicine	positive	urine	Pseudomonas aeruginosa	S		S	R	S		S	S				S			S	S	S
1926	1/25/2021	January	2021	Geriatric	Medicine	positive	catheter_urine	Proteus mirabilis	S		S	S	S		S	S		S		S		S	S	R	S
1939	1/28/2021	January	2021	Geriatric	Medicine	positive	urine	Escherichia coli	S		S	I	S		S	S		S		S		S	S	S	S
1940	1/28/2021	January	2021	Geriatric	Medicine	positive	urine	Klebsiella pneumoniae	S		S	S	S		S	S		S		S		S	S	S	S
1954	1/4/2021	January	2021	Geriatric	Medicine	positive	urine	Enterococcus faecalis								R					R	R	R		R
1955	1/4/2021	January	2021	Geriatric	Medicine	positive	urine	Enterococcus faecalis								R					R	R	R		R
1971	1/6/2021	January	2021	Geriatric	Medicine	positive	catheter_urine	Escherichia coli	S	R	R	R	R		S	R	S		R	S		S	R	S	R
1982	1/7/2021	January	2021	Geriatric	Medicine	positive	ureter	Staphylococcus haemolyticus								R					S	R	R		R
1989	1/8/2021	January	2021	Geriatric	Medicine	negative	urine	Pseudomonas aeruginosa	S		S	R	S		S	S				S			S	R	S
1990	1/8/2021	January	2021	Geriatric	Medicine	negative	urine	Enterococcus faecium								R					R	R	R		R
9	3/27/2020	March	2020	Internal Medicine	Medicine	negative	blood	Staphylococcus epidermidis													S	S	R		R
10	3/27/2020	March	2020	Internal Medicine	Medicine	negative	catheter_urine	Enterococcus faecalis			R	R			S							R			S
14	3/28/2020	March	2020	Internal Medicine	Medicine	negative	blood	Staphylococcus epidermidis													S	R	R		R
23	3/30/2020	March	2020	Internal Medicine	Medicine	negative	blood	Staphylococcus epidermidis													R	R	R		R
24	3/30/2020	March	2020	Internal Medicine	Medicine	negative	blood	Klebsiella pneumoniae spp pneumoniae	S		R	R	R	R	R	R	R		R	R		R	R		R
32	4/1/2020	April	2020	Internal Medicine	Medicine	negative	urine	Escherichia coli			S	S	S		S		S			S		R	S		I
42	4/11/2020	April	2020	Internal Medicine	Medicine	positive	venous_catheter	Staphylococcus capitis													S	S	R		S
43	4/11/2020	April	2020	Internal Medicine	Medicine	positive	blood	Staphylococcus epidermidis													S	S	S		S
68	4/14/2020	April	2020	Internal Medicine	Medicine	negative	catheter_urine	Escherichia coli	S		S	S	S		S	S	S		S	S		S	S		S
78	4/16/2020	April	2020	Internal Medicine	Medicine	negative	Others	Streptococcus oralis			R	R					R
110	4/20/2020	April	2020	Internal Medicine	Medicine	negative	ascites	Staphylococcus aureus													S	S	S		S
111	4/20/2020	April	2020	Internal Medicine	Medicine	negative	urine	Escherichia coli			S	S	S		S		S			S		R	S		I
144	4/28/2020	April	2020	Internal Medicine	Medicine	positive	catheter_urine	Klebsiella pneumoniae spp pneumoniae	I		S	R	S	S	S	R	S		R	S		S	S		R
167	4/4/2020	April	2020	Internal Medicine	Medicine	positive	catheter_urine	Klebsiella pneumoniae spp pneumoniae	R		R		R	R	R	R	R			R		S	R		R
170	4/5/2020	April	2020	Internal Medicine	Medicine	negative	venous_catheter	Staphylococcus epidermidis													S	R	R		R
196	4/8/2020	April	2020	Internal Medicine	Medicine	negative	blood	Staphylococcus epidermidis													S	S	R		R
208	5/10/2020	May	2020	Internal Medicine	Medicine	negative	catheter_urine	Klebsiella pneumoniae spp pneumoniae	S		S	S	S		S	S	S		S	S		S	S		S
232	5/14/2020	May	2020	Internal Medicine	Medicine	negative	urine	Escherichia coli			S	S	S		S		S			S		S	S		S
267	5/23/2020	May	2020	Internal Medicine	Medicine	negative	blood	Staphylococcus lugdunensis													I	R	R		R
269	5/24/2020	May	2020	Internal Medicine	Medicine	negative	catheter_urine	Klebsiella oxytoca	S		S	S	S		S	S	S		S	S		S	S		S
270	5/24/2020	May	2020	Internal Medicine	Medicine	negative	catheter_urine	Morganella morganii	S		S	S	S		I	S	S			S		S	S	R	S
278	5/25/2020	May	2020	Internal Medicine	Medicine	negative	bronchoaspirate	Mycobacterium tuberculosis complex
279	5/25/2020	May	2020	Internal Medicine	Medicine	negative	rectal_tampon	Klebsiella pneumoniae spp pneumoniae	R		R	R	R		R	R	R		R	R		S	R		R
290	5/27/2020	May	2020	Internal Medicine	Medicine	negative	venous_catheter	Staphylococcus intermedius													R	R	R		R
291	5/27/2020	May	2020	Internal Medicine	Medicine	negative	blood	Staphylococcus epidermidis													S	S	R		R
344	5/8/2020	May	2020	Internal Medicine	Medicine	negative	surgical_wound	Klebsiella pneumoniae spp pneumoniae	S		R	R	R		R	S	I		R	R		S	S		S
345	5/8/2020	May	2020	Internal Medicine	Medicine	negative	surgical_wound	Staphylococcus haemolyticus													S	R	R		R
375	6/12/2020	June	2020	Internal Medicine	Medicine	negative	catheter_urine	Pseudomonas aeruginosa	S		S		S		S	S	S		S	S			S		S
394	6/19/2020	June	2020	Internal Medicine	Medicine	negative	venous_catheter	Staphylococcus epidermidis													S	R	R		R
407	6/21/2020	June	2020	Internal Medicine	Medicine	negative	catheter_urine	Klebsiella pneumoniae spp pneumoniae	S		R	R	R	R	R	R	R		R	R		R	R		R
446	6/29/2020	June	2020	Internal Medicine	Medicine	negative	cutaneous_lesion	Staphylococcus aureus													S	S	R		S
470	6/6/2020	June	2020	Internal Medicine	Medicine	negative	catheter_urine	Staphylococcus epidermidis													S	S	R		S
500	7/11/2020	July	2020	Internal Medicine	Medicine	negative	blood	Enterococcus faecalis							S							R
501	7/11/2020	July	2020	Internal Medicine	Medicine	negative	urine	Enterococcus faecium							S							R			R
515	7/15/2020	July	2020	Internal Medicine	Medicine	negative	venous_catheter	Staphylococcus hominis													S	I	R		R
516	7/15/2020	July	2020	Internal Medicine	Medicine	negative	venous_catheter	Staphylococcus epidermidis													I	R	R		R
540	7/17/2020	July	2020	Internal Medicine	Medicine	negative	catheter_urine	Proteus mirabilis	S		I	R	I			I	S		R	S		S	R	R	I
541	7/17/2020	July	2020	Internal Medicine	Medicine	negative	catheter_urine	Escherichia coli	S		I	R	I		I	I	S		R	S		S	R	R	I
549	7/19/2020	July	2020	Internal Medicine	Medicine	positive	urine	Klebsiella pneumoniae spp pneumoniae	R		R	R	R	R	R	R	R			R		I	R		R
561	7/2/2020	July	2020	Internal Medicine	Medicine	negative	catheter_urine	Escherichia coli	S		S	S	S		S	S	S		R	S		R	S		S
597	7/24/2020	July	2020	Internal Medicine	Medicine	negative	catheter_urine	Escherichia coli	S		S	S	S		S	S	S		S	S		S	S		S
600	7/25/2020	July	2020	Internal Medicine	Medicine	negative	catheter_urine	Klebsiella pneumoniae spp pneumoniae	S		R	R	R	R	R	R	I		R	R		S	R		R
606	7/26/2020	July	2020	Internal Medicine	Medicine	negative	blood	Staphylococcus hominis													S	I	S		R
626	7/28/2020	July	2020	Internal Medicine	Medicine	positive	blood	Staphylococcus epidermidis													S	S	R		R
638	7/29/2020	July	2020	Internal Medicine	Medicine	positive	liquor	Staphylococcus kloosii													S	S	S		S
695	7/9/2020	July	2020	Internal Medicine	Medicine	negative	surgical_wound	Staphylococcus coag negative													S	S	S		S
712	8/10/2020	August	2020	Internal Medicine	Medicine	negative	urine	Klebsiella pneumoniae spp pneumoniae			S	S	S		S		S			S		S	S		S
723	8/12/2020	August	2020	Internal Medicine	Medicine	negative	catheter_urine	Escherichia coli	S		S	S	S		S	S	S		S	S		S	S		S
762	8/16/2020	August	2020	Internal Medicine	Medicine	negative	pus	Proteus mirabilis	S		S	S	S			S	S		R	S		R	R	R	S
763	8/16/2020	August	2020	Internal Medicine	Medicine	negative	pus	Enterobacter aerogenes	I		I	R	R		R	S	R		R	R		R	R	R	S
768	8/17/2020	August	2020	Internal Medicine	Medicine	negative	bronchoaspirate	Mycobacterium tuberculosis complex
769	8/17/2020	August	2020	Internal Medicine	Medicine	negative	bronchoaspirate	Pseudomonas aeruginosa		R	S	R	R		S		S			R					S
780	8/19/2020	August	2020	Internal Medicine	Medicine	negative	venous_catheter	Staphylococcus epidermidis													I	R	R		R
781	8/19/2020	August	2020	Internal Medicine	Medicine	negative	blood	Staphylococcus haemolyticus													I	R	R		R
805	8/21/2020	August	2020	Internal Medicine	Medicine	negative	catheter_urine	Klebsiella pneumoniae spp pneumoniae	S		R	R	R		R	R	R		R	R		S	R		R
835	8/25/2020	August	2020	Internal Medicine	Medicine	positive	catheter_urine	Enterococcus faecalis							S							R			S
870	8/30/2020	August	2020	Internal Medicine	Medicine	negative	venous_catheter	Corynebacterium amycolatum													S
871	8/30/2020	August	2020	Internal Medicine	Medicine	negative	venous_catheter	Staphylococcus cohnii spp. urealyticum													R	S	S		S
872	8/30/2020	August	2020	Internal Medicine	Medicine	negative	blood	Staphylococcus aureus													S	S	S		R
873	8/30/2020	August	2020	Internal Medicine	Medicine	negative	catheter_urine	Escherichia coli	S		S	S	S		S	S	S		S	S		S	S		S
874	8/30/2020	August	2020	Internal Medicine	Medicine	negative	catheter_urine	Klebsiella pneumoniae spp pneumoniae	S		R	R	R	R	I	R	I		R	R		S	R		R
887	8/4/2020	August	2020	Internal Medicine	Medicine	negative	catheter_urine	Staphylococcus aureus													S	S	R		S
892	8/6/2020	August	2020	Internal Medicine	Medicine	negative	rectal_tampon	Klebsiella pneumoniae spp pneumoniae	R		R	R	R		R	R	R		R	R		R	I		R
896	8/7/2020	August	2020	Internal Medicine	Medicine	negative	rectal_tampon	Klebsiella pneumoniae spp pneumoniae	R		R	R	R		R	R	R		R	R		S	I		R
959	9/16/2020	September	2020	Internal Medicine	Medicine	negative	ascites	Escherichia coli	S		I	S	S		S	R	S		R	R		R	S		R
984	9/19/2020	September	2020	Internal Medicine	Medicine	positive	urine	Citrobacter farmeri			S	S	S		S		S			R		S	S		S
1011	9/22/2020	September	2020	Internal Medicine	Medicine	positive	blood	Pseudomonas putida	S		S		S		S	S	S		S	S			S		S
1024	9/23/2020	September	2020	Internal Medicine	Medicine	positive	blood	Enterococcus faecalis							S							R
1032	9/24/2020	September	2020	Internal Medicine	Medicine	negative	urine	Escherichia coli			S	S	S		S		S			S		S	S		S
1056	9/27/2020	September	2020	Internal Medicine	Medicine	negative	catheter_urine	Pseudomonas aeruginosa	S		S		S		S	S	S			S			S		S
1066	9/28/2020	September	2020	Internal Medicine	Medicine	positive	blood	Staphylococcus epidermidis								R					S	R	R		R
1077	9/3/2020	September	2020	Internal Medicine	Medicine	positive	urine	Staphylococcus haemolyticus													R	S	S		R
1078	9/3/2020	September	2020	Internal Medicine	Medicine	positive	urine	Klebsiella pneumoniae spp pneumoniae			R	R	R		S		S			R		R	S		S
1102	9/5/2020	September	2020	Internal Medicine	Medicine	negative	blood	Staphylococcus epidermidis													S	S	R		R
1103	9/5/2020	September	2020	Internal Medicine	Medicine	negative	urine	Klebsiella pneumoniae spp pneumoniae			S	S	S		S		S			S		S	S		S
1104	9/5/2020	September	2020	Internal Medicine	Medicine	negative	urine	Enterococcus faecalis							S							R			S
1105	9/5/2020	September	2020	Internal Medicine	Medicine	negative	urine	Escherichia coli			S	S	S		S		S			S		S	S		S
1130	9/8/2020	September	2020	Internal Medicine	Medicine	negative	surgical_wound	Staphylococcus aureus													S	S	S		R
1152	10/1/2020	October	2020	Internal Medicine	Medicine	negative	urine	Enterococcus faecalis								R					R	R	R
1153	10/1/2020	October	2020	Internal Medicine	Medicine	negative	urine	Escherichia coli	S	S	S	S	S		S	S	S		S	S	R	S	S	S	S
1174	10/12/2020	October	2020	Internal Medicine	Medicine	negative	catheter_urine	Citrobacter koseri	S	S	S	S	S		S	S	S			S	R	S	S	S	S
1175	10/12/2020	October	2020	Internal Medicine	Medicine	negative	catheter_urine	Klebsiella pneumoniae	S	S	S	S	S		S	S	S		R	S	R	S	S	R	S
1196	10/15/2020	October	2020	Internal Medicine	Medicine	negative	rectal_tampon	Klebsiella pneumoniae	S	R	R	R	R		R	S	R			R		S	S		S
1197	10/15/2020	October	2020	Internal Medicine	Medicine	positive	catheter_urine	Proteus vulgaris	S	R	S	I	I		S	S	S		R	S	R	S	S	R	S
1198	10/15/2020	October	2020	Internal Medicine	Medicine	positive	catheter_urine	Escherichia coli	S	S	S	S	S		S	S	S			S		S	S		S
1297	10/30/2020	October	2020	Internal Medicine	Medicine	positive	bronchus_lavage	Proteus mirabilis	S	R	R	R	R		R	R	R			R		R	R		R
1302	10/4/2020	October	2020	Internal Medicine	Medicine	negative	venous_catheter	Staphylococcus capitis spp. Ueroluticus								S						S	S		S
1313	10/6/2020	October	2020	Internal Medicine	Medicine	negative	catheter_urine	Escherichia coli	S			S	S		S							R	S		S
1320	10/7/2020	October	2020	Internal Medicine	Medicine	negative	catheter_urine	Citrobacter koseri	R	I	S	S	S		S	S	I			S		S	S		S
1328	10/8/2020	October	2020	Internal Medicine	Medicine	negative	catheter_urine	Escherichia coli	S	S	S	S	S		S	R	S		S	S	R	S	R	S	S
1343	11/10/2020	November	2020	Internal Medicine	Medicine	positive	urine	Escherichia coli	S		S	S	S		S	S		S		S		R	S	S	S
1344	11/10/2020	November	2020	Internal Medicine	Medicine	positive	urine	Klebsiella pneumoniae	S		R	R	R		S	S		I		R		R	S	S	R
1358	11/13/2020	November	2020	Internal Medicine	Medicine	positive	urine	Escherichia coli	S		S	S	S		S	S		S		S		S	S	S	S
1359	11/13/2020	November	2020	Internal Medicine	Medicine	positive	urine	Enterococcus faecalis								S					R	R	R		S
1388	11/17/2020	November	2020	Internal Medicine	Medicine	positive	urine	Klebsiella pneumoniae	S		R	R	R		I	S		I		R		R	S	S	S
1403	11/2/2020	November	2020	Internal Medicine	Medicine	positive	urine	Klebsiella pneumoniae	S	R	R	R	R		S	R	S		R	S	R	R	S	S	R
1404	11/2/2020	November	2020	Internal Medicine	Medicine	positive	urine	Proteus mirabilis	S	I	R	R	R		S	S	S		R	S	R	S	R	R	S
1408	11/20/2020	November	2020	Internal Medicine	Medicine	positive	venous_catheter	Staphylococcus haemolyticus								S					S	S	S		R
1409	11/20/2020	November	2020	Internal Medicine	Medicine	positive	catheter_urine	Escherichia coli	S	S	S	S	S		S	S	S			S		S	S		S
1410	11/20/2020	November	2020	Internal Medicine	Medicine	positive	catheter_urine	Enterococcus faecalis								S					S	R	R		S
1415	11/21/2020	November	2020	Internal Medicine	Medicine	negative	urine	Enterococcus spp.								S					R				S
1417	11/22/2020	November	2020	Internal Medicine	Medicine	positive	blood	Enterococcus faecalis													R	R	R
1418	11/22/2020	November	2020	Internal Medicine	Medicine	positive	blood	Acinetobacter baumanii/haemolyticus	R	R		R			R	R	R					R	R
1419	11/22/2020	November	2020	Internal Medicine	Medicine	positive	catheter_urine	Escherichia coli	S	S	S	S	S		S	S	S		R	S		S	S	S	S
1433	11/23/2020	November	2020	Internal Medicine	Medicine	positive	urine	Klebsiella pneumoniae	S		S	S	S		S	S		R		S		S	S	R	R
1434	11/23/2020	November	2020	Internal Medicine	Medicine	positive	catheter_urine	Enterococcus faecalis								R					I	R	R		R
1435	11/23/2020	November	2020	Internal Medicine	Medicine	positive	catheter_urine	Staphylococcus aureus								S					S	S	S		S
1452	11/25/2020	November	2020	Internal Medicine	Medicine	positive	catheter_urine	Morganella morganii	S	S	S		S		I	S	S			S		S	S		S
1497	11/30/2020	November	2020	Internal Medicine	Medicine	positive	venous_catheter	Staphylococcus hominis spp. hominis								R					S	I	R		R
1498	11/30/2020	November	2020	Internal Medicine	Medicine	positive	blood	Staphylococcus epidermidis								R					S	S	R		R
1499	11/30/2020	November	2020	Internal Medicine	Medicine	positive	catheter_urine	Escherichia coli	S	R	R	R	R		S	R	S		R	S		S	S	S	R
1519	11/5/2020	November	2020	Internal Medicine	Medicine	positive	venous_catheter	Staphylococcus hominis spp. hominis								R					S	S	R		R
1554	11/9/2020	November	2020	Internal Medicine	Medicine	positive	blood	Staphylococcus epidermidis								R					S	R	R		R
1561	12/1/2020	December	2020	Internal Medicine	Medicine	negative	Others	Staphylococcus lugdunensis								S					S	S	S		S
1573	12/10/2020	December	2020	Internal Medicine	Medicine	negative	catheter_urine	Escherichia coli	S	S	S	S	S		S	S	S		S	S		S	S	S	S
1574	12/10/2020	December	2020	Internal Medicine	Medicine	negative	catheter_urine	Citrobacter koseri	I	I	R	R	R		S	R	I			S		S	R	R	R
1596	12/14/2020	December	2020	Internal Medicine	Medicine	positive	urine	Klebsiella ozaenae	S		S	S	S		S	S		S		S		S	S	S	S
1607	12/15/2020	December	2020	Internal Medicine	Medicine	positive	venous_catheter	Staphylococcus haemolyticus								R					S	R	R		R
1608	12/15/2020	December	2020	Internal Medicine	Medicine	negative	catheter_urine	Escherichia coli	S	R	R	R	R		S	R	S		R	I		R	R	S	R
1630	12/18/2020	December	2020	Internal Medicine	Medicine	positive	catheter_urine	Pseudomonas aeruginosa	S		S	R	R		S	S	S		R	S	R		S	S	S	R
1653	12/21/2020	December	2020	Internal Medicine	Medicine	positive	urine	Enterococcus faecalis								R					R	R	R		R
1667	12/23/2020	December	2020	Internal Medicine	Medicine	positive	ascites	Pseudomonas aeruginosa	R			R	R		I	R	R			S			R		R
1711	12/28/2020	December	2020	Internal Medicine	Medicine	positive	ureter	Enterococcus faecium								R					S	R	R		R
1712	12/28/2020	December	2020	Internal Medicine	Medicine	positive	feces	Salmonella spp.		S	S	S	S		S	S	S			S		S
1731	12/3/2020	December	2020	Internal Medicine	Medicine	positive	blood	Staphylococcus epidermidis								S					R	S	S		S
1732	12/3/2020	December	2020	Internal Medicine	Medicine	positive	blood	Escherichia coli	S	R	R	R	R		S	R	S			S		R	R		R
1747	12/31/2020	December	2020	Internal Medicine	Medicine	positive	venous_catheter	Staphylococcus epidermidis								R					S	R	R		R
1784	1/1/2021	January	2021	Internal Medicine	Medicine	negative	venous_catheter	Staphylococcus haemolyticus								R					S	R	R		R
1797	1/10/2021	January	2021	Internal Medicine	Medicine	positive	urine	Enterococcus faecalis								S					R	R	R		S
1798	1/10/2021	January	2021	Internal Medicine	Medicine	negative	urine	Enterococcus faecium								R					S	R	R		R
1821	1/13/2021	January	2021	Internal Medicine	Medicine	negative	catheter_urine	Escherichia coli	S	S	S	S	S		S	S	S		S	S		S	S	S	S
1822	1/13/2021	January	2021	Internal Medicine	Medicine	negative	catheter_urine	Klebsiella pneumoniae	S	S	S	S	S		S	S	S		S	S		S	S	S	S
1853	1/17/2021	January	2021	Internal Medicine	Medicine	negative	blood	Staphylococcus aureus								S					S	S	S		S
1884	1/20/2021	January	2021	Internal Medicine	Medicine	positive	urine	Klebsiella pneumoniae	S	R	R	R	R		I	R	S	R	R	R		R	R	S	R
1889	1/21/2021	January	2021	Internal Medicine	Medicine	negative	urine	Proteus mirabilis	S		S	S	S		S	S		R		S		R	S	R	R
1896	1/22/2021	January	2021	Internal Medicine	Medicine	negative	catheter_urine	Enterobacter cloacae	S	S	S	S	S		S	S	S		S	S		S	S		S
1897	1/22/2021	January	2021	Internal Medicine	Medicine	negative	catheter_urine	Hafnia alvei	S	I	R	R	R		S	S	S		R	R		S	S	R	S
1983	1/7/2021	January	2021	Internal Medicine	Medicine	negative	ascites	Klebsiella pneumoniae	S	S	S	S	S		S	S	S			R		S	S		S
1994	1/8/2021	January	2021	Internal Medicine	Medicine	positive	bronchoaspirate	Acinetobacter baumanii/haemolyticus	R	R		R			R	R	R					R	R		R
2001	1/9/2021	January	2021	Internal Medicine	Medicine	negative	Others	Pseudomonas aeruginosa	S	I	S	R	S		S	S	S			S			S		S
2002	1/9/2021	January	2021	Internal Medicine	Medicine	negative	Others	Citrobacter koseri	S	R	I	I	S		S	S	S			I		S	S		S
26	3/31/2020	March	2020	Internal Medicine – Hematology	Medicine	negative	venous_catheter	Staphylococcus capitis													S	S	S		S
31	4/1/2020	April	2020	Internal Medicine – Hematology	Medicine	negative	bronchus_lavage	Klebsiella pneumoniae spp pneumoniae	S		S	S	S		S	S	S		S	S		S	S		S
37	4/10/2020	April	2020	Internal Medicine – Hematology	Medicine	negative	catheter_urine	Morganella morganii	S		S	S	S		I	S	S			S		S	S	R	S
38	4/10/2020	April	2020	Internal Medicine – Hematology	Medicine	negative	catheter_urine	Enterobacter cloacae	S		S	S	S		S	S	S		S	S		S	S		S
66	4/14/2020	April	2020	Internal Medicine – Hematology	Medicine	negative	urine	Enterococcus faecalis							S							R			S
67	4/14/2020	April	2020	Internal Medicine – Hematology	Medicine	negative	urine	Escherichia coli	S		S	S	S		S	S	S		R	S		S	S		S
84	4/17/2020	April	2020	Internal Medicine – Hematology	Medicine	negative	catheter_urine	Escherichia coli	S		S	S	S		S	S	S		S	S		S	S		S
114	4/22/2020	April	2020	Internal Medicine – Hematology	Medicine	negative	urine	Escherichia coli			R	R	R		S		S			R		R	R		R
136	4/26/2020	April	2020	Internal Medicine – Hematology	Medicine	negative	urine	Staphylococcus aureus													S	S	S		R
166	4/4/2020	April	2020	Internal Medicine – Hematology	Medicine	negative	urine	Enterococcus faecium							R							R			R
168	4/5/2020	April	2020	Internal Medicine – Hematology	Medicine	negative	blood	Escherichia coli	S		S	S	S		S	S	S		S	S		S	S		S
169	4/5/2020	April	2020	Internal Medicine – Hematology	Medicine	negative	blood	Pseudomonas aeruginosa	S		S		S		S	S	S		S	S			S		S
240	5/17/2020	May	2020	Internal Medicine – Hematology	Medicine	negative	venous_catheter	Staphylococcus hominis													S	R	R		R
245	5/18/2020	May	2020	Internal Medicine – Hematology	Medicine	negative	catheter_urine	Enterococcus faecalis							R							R			S
246	5/18/2020	May	2020	Internal Medicine – Hematology	Medicine	negative	catheter_urine	Escherichia coli	S		S	S	S		S	S	S		R	S		S	S		S
257	5/21/2020	May	2020	Internal Medicine – Hematology	Medicine	negative	ascites	Staphylococcus haemolyticus													I	R	R		R
263	5/22/2020	May	2020	Internal Medicine – Hematology	Medicine	negative	oral_tampon	Staphylococcus aureus													S	S	S		S
265	5/23/2020	May	2020	Internal Medicine – Hematology	Medicine	positive	venous_catheter	Staphylococcus epidermidis													S	S	S		S
266	5/23/2020	May	2020	Internal Medicine – Hematology	Medicine	positive	venous_catheter	Pseudomonas aeruginosa	S		S		S		S	S	S		S	S			S		S
297	5/28/2020	May	2020	Internal Medicine – Hematology	Medicine	positive	urine	Klebsiella pneumoniae spp pneumoniae			R	S	S		S		S			S		S	S		S
306	5/3/2020	May	2020	Internal Medicine – Hematology	Medicine	negative	urine	Enterococcus faecium							R							R			R
311	5/31/2020	May	2020	Internal Medicine – Hematology	Medicine	negative	blood	Pseudomonas aeruginosa	S		S		S		S	S	S		S	S			S		S
371	6/11/2020	June	2020	Internal Medicine – Hematology	Medicine	negative	venous_catheter	Staphylococcus hominis													R	S	R		S
409	6/22/2020	June	2020	Internal Medicine – Hematology	Medicine	negative	blood	Pseudomonas aeruginosa	S		S		S		S	S	S		S	S			S		S
416	6/24/2020	June	2020	Internal Medicine – Hematology	Medicine	negative	sputum	Escherichia coli	S		S	S	S		S	S	S		R	I		R	R		I
433	6/28/2020	June	2020	Internal Medicine – Hematology	Medicine	negative	sputum	Pseudomonas aeruginosa	S		R		S		S	R	S		S	S			S		S
489	7/1/2020	July	2020	Internal Medicine – Hematology	Medicine	negative	urine	Escherichia coli			S	S	S		S		S			S		S	S		S
537	7/17/2020	July	2020	Internal Medicine – Hematology	Medicine	negative	venous_catheter	Escherichia coli	S		S	S	S		S	I	S		R	S		R	S		I
538	7/17/2020	July	2020	Internal Medicine – Hematology	Medicine	negative	venous_catheter	Escherichia coli	S		S	S	S		S	S	S		S	S		S	S		S
539	7/17/2020	July	2020	Internal Medicine – Hematology	Medicine	negative	blood	Staphylococcus capitis													S	S	S		S
560	7/2/2020	July	2020	Internal Medicine – Hematology	Medicine	negative	venous_catheter	Escherichia coli	S		S	S	S		S	S	S		R	R		R	S		S
568	7/20/2020	July	2020	Internal Medicine – Hematology	Medicine	negative	venous_catheter	Staphylococcus lugdunensis													S	S	R		S
581	7/22/2020	July	2020	Internal Medicine – Hematology	Medicine	negative	venous_catheter	Streptococcus gordonii			S	S					S
582	7/22/2020	July	2020	Internal Medicine – Hematology	Medicine	negative	venous_catheter	Escherichia coli	S		S	S	S		S	S	S		R	S		R	S		S
583	7/22/2020	July	2020	Internal Medicine – Hematology	Medicine	negative	blood	Streptococcus bovis II			S	S					S
615	7/27/2020	July	2020	Internal Medicine – Hematology	Medicine	negative	catheter	Staphylococcus epidermidis													I	S	S		S
616	7/27/2020	July	2020	Internal Medicine – Hematology	Medicine	negative	blood	Enterococcus faecium							R							R
647	7/3/2020	July	2020	Internal Medicine – Hematology	Medicine	negative	catheter_urine	Klebsiella pneumoniae spp pneumoniae	S		S	S	S		S	S	S		S	S		S	S		S
648	7/3/2020	July	2020	Internal Medicine – Hematology	Medicine	negative	catheter_urine	Escherichia coli	S		S	S	S		S	S	S		S	S		S	S		S
677	7/6/2020	July	2020	Internal Medicine – Hematology	Medicine	negative	sputum	Stenotrophomonas maltophila														S
678	7/6/2020	July	2020	Internal Medicine – Hematology	Medicine	negative	catheter_urine	Morganella morganii	S		S	R	I		R	S	R			S		R	S	R	S
692	7/8/2020	July	2020	Internal Medicine – Hematology	Medicine	negative	bedsore	Staphylococcus epidermidis													I	S	S		R
756	8/15/2020	August	2020	Internal Medicine – Hematology	Medicine	negative	venous_catheter	Staphylococcus epidermidis													I	R	R		R
757	8/15/2020	August	2020	Internal Medicine – Hematology	Medicine	negative	venous_catheter	Staphylococcus hominis													S	I	S		R
802	8/20/2020	August	2020	Internal Medicine – Hematology	Medicine	negative	blood	Pseudomonas aeruginosa	S		S		S		S	S	S		S	S			S		S
834	8/25/2020	August	2020	Internal Medicine – Hematology	Medicine	negative	catheter	Staphylococcus cohnii spp. cohnii													S	S	S		S
867	8/30/2020	August	2020	Internal Medicine – Hematology	Medicine	negative	sputum	Escherichia coli	S		S	S	S		S	S	S		S	S		S	S		S
868	8/30/2020	August	2020	Internal Medicine – Hematology	Medicine	negative	urine	Enterococcus faecalis							S							R			S
869	8/30/2020	August	2020	Internal Medicine – Hematology	Medicine	negative	urine	Escherichia coli			S	S	S		S		S			S		S	S		S
886	8/4/2020	August	2020	Internal Medicine – Hematology	Medicine	negative	blood	Escherichia coli	S		S	S	S		S	S	S		R	S		R	S		S
903	8/8/2020	August	2020	Internal Medicine – Hematology	Medicine	negative	venous_catheter	Pseudomonas aeruginosa	S		S		S		R	S	S		S	S			S		S
904	8/8/2020	August	2020	Internal Medicine – Hematology	Medicine	negative	venous_catheter	Streptococcus cristatus			S	S					S
905	8/8/2020	August	2020	Internal Medicine – Hematology	Medicine	negative	catheter_urine	Klebsiella pneumoniae spp pneumoniae	S		S	S	S		S	S	S		S	S		S	S		S
911	8/9/2020	August	2020	Internal Medicine – Hematology	Medicine	negative	catheter_urine	Klebsiella pneumoniae spp pneumoniae	S		R	R	R	R	R	R	R		R	R		R	R		R
1021	9/23/2020	September	2020	Internal Medicine – Hematology	Medicine	negative	venous_catheter	Staphylococcus capitis													S	S	S		S
1022	9/23/2020	September	2020	Internal Medicine – Hematology	Medicine	negative	venous_catheter	Pseudomonas putida	S		S		S		S	S	I		S	S			S		S
1023	9/23/2020	September	2020	Internal Medicine – Hematology	Medicine	negative	venous_catheter	Staphylococcus epidermidis													S	R	R		R
1076	9/3/2020	September	2020	Internal Medicine – Hematology	Medicine	negative	blood	Escherichia coli	S		S	S	S		S	S	S		R	S		R	S		S
1110	9/6/2020	September	2020	Internal Medicine – Hematology	Medicine	negative	urine	Escherichia coli			R	R	R		S		S			R		R	R		R
1151	10/1/2020	October	2020	Internal Medicine – Hematology	Medicine	negative	catheter_urine	Klebsiella pneumoniae	S	R	R	R	R		R	R	R		R	R	R	S	S	S	R	R
1182	10/13/2020	October	2020	Internal Medicine – Hematology	Medicine	negative	blood	Klebsiella pneumoniae	S	S	S	S	S		S	S	S			S		R	S		S
1183	10/13/2020	October	2020	Internal Medicine – Hematology	Medicine	negative	blood	Escherichia coli	S	S	S	S	S		S	S	S			S		R	S		S
1194	10/15/2020	October	2020	Internal Medicine – Hematology	Medicine	negative	blood	Staphylococcus aureus								S						S	S		S
1195	10/15/2020	October	2020	Internal Medicine – Hematology	Medicine	negative	urine	Escherichia coli	S	S	S	S	S		S	S	S		S	S		S	S	S	S
1206	10/16/2020	October	2020	Internal Medicine – Hematology	Medicine	negative	blood	Klebsiella pneumoniae	S	S	S	S	S		S	S	S			S		S	S		S
1239	10/2/2020	October	2020	Internal Medicine – Hematology	Medicine	positive	cutaneous_lesion	Staphylococcus aureus								R					S	S	S		R
1248	10/21/2020	October	2020	Internal Medicine – Hematology	Medicine	negative	venous_catheter	Streptococcus mitis group			S	S		S
1305	10/5/2020	October	2020	Internal Medicine – Hematology	Medicine	negative	blood	Corynebacterium spp.													S				R
1306	10/5/2020	October	2020	Internal Medicine – Hematology	Medicine	negative	nasal_tampon	Staphylococcus epidermidis								R					S	R	S		R
1307	10/5/2020	October	2020	Internal Medicine – Hematology	Medicine	negative	nasal_tampon	Staphylococcus haemolyticus								R					S	R	R		R
1308	10/5/2020	October	2020	Internal Medicine – Hematology	Medicine	negative	urine	Escherichia coli	S	S	S	S	S		S	S	S		R	S	R	R	S	S	S
1312	10/6/2020	October	2020	Internal Medicine – Hematology	Medicine	negative	bronchus_lavage	Acinetobacter lwoffii	S	R		R	R			S	S					I	S
1317	10/7/2020	October	2020	Internal Medicine – Hematology	Medicine	negative	urine	Proteus mirabilis	S	S	S	S	S		S	R	S		S	S	R	R	S	R	R
1318	10/7/2020	October	2020	Internal Medicine – Hematology	Medicine	negative	urine	Klebsiella pneumoniae	S	S	S	R	I		S	S	S		R	S	R	R	S	S	S
1319	10/7/2020	October	2020	Internal Medicine – Hematology	Medicine	negative	urine	Escherichia coli	S	I	S	I	R		S	S	S		R	S	R	R	S	S	S
1367	11/15/2020	November	2020	Internal Medicine – Hematology	Medicine	negative	venous_catheter	Staphylococcus auricularis								S					S	S	S		S
1382	11/16/2020	November	2020	Internal Medicine – Hematology	Medicine	negative	blood	Staphylococcus epidermidis								S					S	S	S		S
1518	11/5/2020	November	2020	Internal Medicine – Hematology	Medicine	negative	urine	Citrobacter koseri	S	S	S	S	S		S	S	S			S	R	S	S	S	S
1553	11/9/2020	November	2020	Internal Medicine – Hematology	Medicine	negative	blood	Staphylococcus epidermidis								R					R	S	S		R
1640	12/2/2020	December	2020	Internal Medicine – Hematology	Medicine	negative	urine	Staphylococcus haemolyticus								R					S	R	R		R
1666	12/23/2020	December	2020	Internal Medicine – Hematology	Medicine	negative	venous_catheter	Staphylococcus epidermidis								S					S	S	R		S
1721	12/29/2020	December	2020	Internal Medicine – Hematology	Medicine	negative	urine	Escherichia coli	S		S	S	S		S	S		S		S		S	S	S	S
1722	12/29/2020	December	2020	Internal Medicine – Hematology	Medicine	negative	urine	Enterobacter aerogenes	S		S	S	S		S	S		S		S		S	S	S	S
1759	12/6/2020	December	2020	Internal Medicine – Hematology	Medicine	negative	sputum	Staphylococcus aureus								S					S	S	S		S
1783	1/1/2021	January	2021	Internal Medicine – Hematology	Medicine	positive	blood	Enterococcus faecalis													R	R	R
1820	1/13/2021	January	2021	Internal Medicine – Hematology	Medicine	positive	blood	Staphylococcus aureus								S					S	S	S		S
1870	1/19/2021	January	2021	Internal Medicine – Hematology	Medicine	negative	urine	Escherichia coli	S		S	S	S		S	S		S		S		S	S	S	S
1871	1/19/2021	January	2021	Internal Medicine – Hematology	Medicine	negative	catheter_urine	Proteus mirabilis	S	S	S	S	S		S	S	S		S	S		S	I	R	S
1883	1/20/2021	January	2021	Internal Medicine – Hematology	Medicine	negative	blood	Escherichia coli	S	S	S	S	S		S	S	S			S		S	S		S
1888	1/21/2021	January	2021	Internal Medicine – Hematology	Medicine	negative	venous_catheter	Escherichia coli	S	S	S	S	S		S	S	S			S		R	S		S
134	4/26/2020	April	2020	Low intensity COVID	Medicine	positive	blood	Staphylococcus hominis													S	S	S		S
846	8/27/2020	August	2020	Low intensity COVID	Medicine	positive	urine	Escherichia coli			R	R	R		S		S			S		R	S		R
1193	10/15/2020	October	2020	Low intensity COVID	Medicine	positive	catheter_urine	Morganella morganii	S	S	S		S		I	S	S			S		R	S		S
1216	10/18/2020	October	2020	Low intensity COVID	Medicine	positive	urine	Escherichia coli	S	S	S	S	S		S	S	S		R	S	R	S	S	S	S
1363	11/14/2020	November	2020	Low intensity COVID	Medicine	positive	blood	Staphylococcus aureus								S					S	S	R		S
1378	11/16/2020	November	2020	Low intensity COVID	Medicine	positive	urine	Escherichia coli	S		S	S	S		S	S		S		S		S	S	S	S
1440	11/24/2020	November	2020	Low intensity COVID	Medicine	positive	pus	Staphylococcus epidermidis								R					R	R	R		R
1441	11/24/2020	November	2020	Low intensity COVID	Medicine	positive	pus	Staphylococcus capitis								S					I	S	S		S
1451	11/25/2020	November	2020	Low intensity COVID	Medicine	positive	urine	Enterococcus faecalis								S					R	R	R		S
1465	11/26/2020	November	2020	Low intensity COVID	Medicine	positive	blood	Staphylococcus aureus								S						S	S		S
1604	12/15/2020	December	2020	Low intensity COVID	Medicine	positive	urine	Enterococcus faecalis								R					R	R	R		R
1634	12/2/2020	December	2020	Low intensity COVID	Medicine	positive	venous_catheter	Corynebacterium spp.															R		R
1635	12/2/2020	December	2020	Low intensity COVID	Medicine	positive	blood	Staphylococcus haemolyticus								S					S	S	S		S
1636	12/2/2020	December	2020	Low intensity COVID	Medicine	positive	blood	Klebsiella pneumoniae	R	S	S	S	S		S	S	S			S		S	S		S
1683	12/24/2020	December	2020	Low intensity COVID	Medicine	positive	urine	Escherichia coli	I		S	R	R		S	S		S		R		S	S	S	R
1693	12/26/2020	December	2020	Low intensity COVID	Medicine	positive	blood	Staphylococcus aureus								R					S	S	R		R
1792	1/10/2021	January	2021	Low intensity COVID	Medicine	positive	blood	Staphylococcus epidermidis								S					S	S	R		S
1793	1/10/2021	January	2021	Low intensity COVID	Medicine	positive	blood	Acinetobacter lwoffii	S						R	S	R					S	S
1794	1/10/2021	January	2021	Low intensity COVID	Medicine	positive	urine	Klebsiella pneumoniae	S		S	S	S		S	S		S		S		S	S	S	S
1818	1/12/2021	January	2021	Low intensity COVID	Medicine	positive	rectal_tampon	Klebsiella pneumoniae	S	R	R	R	R		R	R	R			R		R	S		R
1960	1/5/2021	January	2021	Low intensity COVID	Medicine	positive	catheter_urine	Enterococcus faecium								R					R	R	R		R
1961	1/5/2021	January	2021	Low intensity COVID	Medicine	positive	catheter_urine	Enterococcus faecium								R					S	R	R		R
1987	1/8/2021	January	2021	Low intensity COVID	Medicine	positive	catheter_urine	Klebsiella pneumoniae	S	R	R	R	R		I	R	R		R	R		S	S	S	R
1988	1/8/2021	January	2021	Low intensity COVID	Medicine	positive	catheter_urine	Pseudomonas aeruginosa	R		S	R	S		S	S	S		S	S	R		R	S	S	R
91	4/19/2020	April	2020	Medicine and Surgery	Medicine	negative	blood	Escherichia coli	I		R	R	R		S	R	S		R	R		R	S		R
244	5/18/2020	May	2020	Medicine and Surgery	Medicine	negative	bronchus_lavage	Klebsiella pneumoniae spp pneumoniae	S		S	S	S		S	I	S		S	S		S	S		I
287	5/26/2020	May	2020	Medicine and Surgery	Medicine	negative	bile	Enterobacter cloacae	S		S	R	S		S	S	S		S	S		S	S		S
296	5/28/2020	May	2020	Medicine and Surgery	Medicine	negative	sputum	Staphylococcus aureus													S	S	R		R
301	5/29/2020	May	2020	Medicine and Surgery	Medicine	negative	sputum	Pseudomonas aeruginosa	R	I	R	R	R		R	R	R			I			R		R
302	5/29/2020	May	2020	Medicine and Surgery	Medicine	negative	sputum	Staphylococcus aureus													S	S	S		R
327	5/6/2020	May	2020	Medicine and Surgery	Medicine	negative	blood	Staphylococcus capitis													S	R	R		R
354	5/9/2020	May	2020	Medicine and Surgery	Medicine	negative	catheter_urine	Proteus mirabilis	S		I	S	S			R	S		S	S		R	I	R	R
368	6/10/2020	June	2020	Medicine and Surgery	Medicine	negative	catheter_urine	Escherichia coli			R	R	R		S		S			S		S	S		R
405	6/21/2020	June	2020	Medicine and Surgery	Medicine	negative	urine	Streptococcus agalactiae (gr B)															R
406	6/21/2020	June	2020	Medicine and Surgery	Medicine	negative	urine	Escherichia coli			R	R	R		S		S			S		R	R		R
414	6/24/2020	June	2020	Medicine and Surgery	Medicine	negative	blood	Staphylococcus capitis													S	S	S		R
415	6/24/2020	June	2020	Medicine and Surgery	Medicine	negative	blood	Staphylococcus epidermidis													S	S	S		R
426	6/26/2020	June	2020	Medicine and Surgery	Medicine	negative	blood	Staphylococcus capitis													S	R	R		R
444	6/29/2020	June	2020	Medicine and Surgery	Medicine	negative	urine	Escherichia coli			S	S	S		S		S			S		R	S		I
445	6/29/2020	June	2020	Medicine and Surgery	Medicine	negative	urine	Klebsiella pneumoniae spp pneumoniae			R	R	R		S		S			I		R	S		R
453	6/30/2020	June	2020	Medicine and Surgery	Medicine	negative	bronchoaspirate	Pseudomonas aeruginosa	R		R		R		R	R	R		R	R			R		R
454	6/30/2020	June	2020	Medicine and Surgery	Medicine	negative	bronchoaspirate	Enterococcus faecium							R							R
474	6/7/2020	June	2020	Medicine and Surgery	Medicine	negative	pus	Staphylococcus aureus													S	S	S		S
482	6/8/2020	June	2020	Medicine and Surgery	Medicine	negative	sputum	Escherichia coli	S		R	R	R		S	R	S		R	S		R	S		R
483	6/8/2020	June	2020	Medicine and Surgery	Medicine	negative	sputum	Enterobacter cloacae	S		S	S	S		S	S	S		S	S		S	S		S
536	7/17/2020	July	2020	Medicine and Surgery	Medicine	negative	blood	Staphylococcus aureus													S	S	S		S
543	7/18/2020	July	2020	Medicine and Surgery	Medicine	negative	rectal_tampon	Klebsiella pneumoniae spp pneumoniae	S		R	R	R		R	R	R		R	R		S	R		R
544	7/18/2020	July	2020	Medicine and Surgery	Medicine	negative	catheter_urine	Enterococcus faecium							R							R			R
557	7/2/2020	July	2020	Medicine and Surgery	Medicine	negative	bronchoaspirate	Kluyvera ascorbata	S		S	S	S		S	S	S		I	S		S	S		S
558	7/2/2020	July	2020	Medicine and Surgery	Medicine	negative	surgical_wound	Staphylococcus coag negative													S	S	S		S
580	7/22/2020	July	2020	Medicine and Surgery	Medicine	negative	catheter_urine	Enterobacter aerogenes	I		S	S	S		S	R	S		R	R		R	S		R
592	7/23/2020	July	2020	Medicine and Surgery	Medicine	negative	catheter	Enterobacter asburiae	S		S	S	S		S	S	S		S	S		S	S		S
613	7/27/2020	July	2020	Medicine and Surgery	Medicine	negative	venous_catheter	Morganella morganii	S		S	R	R		I	S	S			S		S	S	R	S
614	7/27/2020	July	2020	Medicine and Surgery	Medicine	negative	blood	Corynebacterium matruchotii													R		R		R
645	7/3/2020	July	2020	Medicine and Surgery	Medicine	negative	pus	Enterococcus faecalis							S							R
646	7/3/2020	July	2020	Medicine and Surgery	Medicine	negative	pus	Pseudomonas aeruginosa	S		S		S		S	S	S		S	S			S		S
689	7/8/2020	July	2020	Medicine and Surgery	Medicine	negative	bronchoaspirate	Klebsiella pneumoniae spp pneumoniae	I		R	R	R	R	R	R	R		R	R		S	S	R	R
690	7/8/2020	July	2020	Medicine and Surgery	Medicine	negative	bronchoaspirate	Staphylococcus aureus							R						S	S	S		R
691	7/8/2020	July	2020	Medicine and Surgery	Medicine	negative	bronchoaspirate	Staphylococcus haemolyticus													I	R	R		R
702	8/1/2020	August	2020	Medicine and Surgery	Medicine	negative	feces	Proteus mirabilis	S		I	R	S			R	S		R	S		R	I	R	R
703	8/1/2020	August	2020	Medicine and Surgery	Medicine	negative	rectal_tampon	Klebsiella pneumoniae spp pneumoniae	S		R	R	R		R	R	R		R	R		R	S		R
761	8/16/2020	August	2020	Medicine and Surgery	Medicine	negative	urine	Klebsiella pneumoniae spp pneumoniae	S		R	R	R	R	R	R	R			R		R	R		R
775	8/18/2020	August	2020	Medicine and Surgery	Medicine	negative	sputum	Serratia marcescens	I		S	S	S		S	S	S		S	S		S	S	R	S
776	8/18/2020	August	2020	Medicine and Surgery	Medicine	negative	sputum	Pseudomonas aeruginosa	S		R		R		S	S	S		R	R			S		S
794	8/2/2020	August	2020	Medicine and Surgery	Medicine	negative	urine	Escherichia coli			R	R	R		S		S			S		S	R		R
858	8/3/2020	August	2020	Medicine and Surgery	Medicine	negative	blood	Escherichia coli	S		S	S	S		S	S	S		S	S		S	S		S
866	8/30/2020	August	2020	Medicine and Surgery	Medicine	negative	blood	Staphylococcus epidermidis													S	R	R		R
884	8/4/2020	August	2020	Medicine and Surgery	Medicine	negative	feces	Salmonella spp.	R		S	S	S		S	S	S		S	S		S	R
885	8/4/2020	August	2020	Medicine and Surgery	Medicine	negative	urine	Escherichia coli			S	S	S		S		S			S		S	S		S
902	8/8/2020	August	2020	Medicine and Surgery	Medicine	negative	ureter	Escherichia coli	S		S	S	S		S	S	S		R	S		S	S		S
935	9/13/2020	September	2020	Medicine and Surgery	Medicine	negative	blood	Staphylococcus hominis													R	S	S		S
982	9/19/2020	September	2020	Medicine and Surgery	Medicine	negative	blood	Staphylococcus haemolyticus													S	R	R		R
983	9/19/2020	September	2020	Medicine and Surgery	Medicine	negative	blood	Staphylococcus epidermidis													S	S	S		S
1003	9/21/2020	September	2020	Medicine and Surgery	Medicine	negative	ureter	Pseudomonas aeruginosa	S		S		S		S	S	I		S	S			S		S
1042	9/25/2020	September	2020	Medicine and Surgery	Medicine	negative	blood	Klebsiella pneumoniae spp pneumoniae	S		R		R	R	R	R	R			R		S	S		R
1043	9/25/2020	September	2020	Medicine and Surgery	Medicine	negative	ureter	Escherichia coli	S		R	R	R		S	R	S		R	S		R	R		R
1093	9/4/2020	September	2020	Medicine and Surgery	Medicine	negative	blood	Enterobacter cloacae	S		S	S	S		S	S	S		S	S		S	S		S
1100	9/5/2020	September	2020	Medicine and Surgery	Medicine	negative	catheter	Staphylococcus haemolyticus													S	S	S		S
1101	9/5/2020	September	2020	Medicine and Surgery	Medicine	negative	catheter	Staphylococcus epidermidis													I	S	S		R
1121	9/7/2020	September	2020	Medicine and Surgery	Medicine	negative	surgical_wound	Pseudomonas aeruginosa	S		S		S		S	R	S		S	S			S		R
1122	9/7/2020	September	2020	Medicine and Surgery	Medicine	negative	surgical_wound	Staphylococcus epidermidis													R	R	R		R
1136	9/9/2020	September	2020	Medicine and Surgery	Medicine	positive	bronchoaspirate	Staphylococcus aureus													S	S	R		S
1159	10/10/2020	October	2020	Medicine and Surgery	Medicine	positive	urine	Escherichia coli	S	R	R	R	I		S	R	S		R	S	R	S	R	R	R
1181	10/13/2020	October	2020	Medicine and Surgery	Medicine	positive	blood	Enterococcus faecium													R	R	R
1209	10/17/2020	October	2020	Medicine and Surgery	Medicine	positive	bronchoaspirate	Klebsiella pneumoniae	I	R	R	R	R		S	S	S			S		R	S		S
1219	10/18/2020	October	2020	Medicine and Surgery	Medicine	positive	urine	Escherichia coli	I	S	S	S	S		S	S	S		R	S	R	S	S	S	S
1285	10/28/2020	October	2020	Medicine and Surgery	Medicine	positive	blood	Staphylococcus simulans								S					S	I	R		S
1304	10/5/2020	October	2020	Medicine and Surgery	Medicine	positive	bronchoaspirate	Enterobacter cloacae	R	R	R	R	I		R	R	I			S		R	R		R
1339	11/1/2020	November	2020	Medicine and Surgery	Medicine	positive	blood	Staphylococcus hominis spp. hominis								S					S	S	S		S
1364	11/14/2020	November	2020	Medicine and Surgery	Medicine	negative	venous_catheter	Staphylococcus haemolyticus								R						R	R		R
1495	11/30/2020	November	2020	Medicine and Surgery	Medicine	positive	liquor	Staphylococcus haemolyticus								R					S	R	R		R
1496	11/30/2020	November	2020	Medicine and Surgery	Medicine	positive	liquor	Staphylococcus epidermidis								S					S	S	S		S
1504	11/4/2020	November	2020	Medicine and Surgery	Medicine	positive	bronchoaspirate	Citrobacter koseri	S	S	S	S	S		S	S	S			S		S	S		S
1505	11/4/2020	November	2020	Medicine and Surgery	Medicine	positive	bronchoaspirate	Escherichia coli	S	S	S	S	S		S	S	S			S		S	S		S
1529	11/6/2020	November	2020	Medicine and Surgery	Medicine	positive	blood	Pantoea agglomerans	S	S	S	S	S		S	S	S			S		S	S		S
1538	11/8/2020	November	2020	Medicine and Surgery	Medicine	positive	blood	Staphylococcus epidermidis								S					S	S	S		S
1587	12/13/2020	December	2020	Medicine and Surgery	Medicine	negative	ascites	Escherichia coli	S	S	S	S	S		S	S	S			S		S	S		S
1612	12/16/2020	December	2020	Medicine and Surgery	Medicine	negative	venous_catheter	Staphylococcus epidermidis								R					S	I	R		R
1621	12/17/2020	December	2020	Medicine and Surgery	Medicine	negative	urine	Klebsiella pneumoniae	S		S	S	S		S	S		S		S		S	S	S	S
1628	12/18/2020	December	2020	Medicine and Surgery	Medicine	positive	liquor	Staphylococcus capitis								S					S	S	S		S
1657	12/22/2020	December	2020	Medicine and Surgery	Medicine	negative	ascites	Staphylococcus xylosus								S					S	S	R		S
1658	12/22/2020	December	2020	Medicine and Surgery	Medicine	negative	ascites	Staphylococcus haemolyticus								R					S	R	R		R
1659	12/22/2020	December	2020	Medicine and Surgery	Medicine	positive	venous_catheter	Staphylococcus epidermidis								R					R	S	R		R
1660	12/22/2020	December	2020	Medicine and Surgery	Medicine	positive	blood	Staphylococcus hominis spp. hominis								R					S	I	R		R
1718	12/29/2020	December	2020	Medicine and Surgery	Medicine	negative	catheter	Enterococcus faecium													S	R	R
1771	12/7/2020	December	2020	Medicine and Surgery	Medicine	negative	bronchus_lavage	Escherichia coli	S	S	S	S	S		S	S	S			S		S	S		S
1772	12/7/2020	December	2020	Medicine and Surgery	Medicine	negative	bronchus_lavage	Staphylococcus aureus								S					S	S	S		S
1773	12/7/2020	December	2020	Medicine and Surgery	Medicine	negative	bronchus_lavage	Serratia marcescens	S	S	S		S		S	S	S			S		S	S		S
1776	12/8/2020	December	2020	Medicine and Surgery	Medicine	negative	venous_catheter	Staphylococcus epidermidis								S					R	S	R		S
1777	12/8/2020	December	2020	Medicine and Surgery	Medicine	negative	venous_catheter	Staphylococcus hominis spp. hominis								S					S	S	S		S
1810	1/11/2021	January	2021	Medicine and Surgery	Medicine	negative	bronchoaspirate	Escherichia coli	S	R	R	R	R		S	R	S			S		S	S		R
1869	1/19/2021	January	2021	Medicine and Surgery	Medicine	negative	ascites	Staphylococcus aureus								S					S	S	S		S
1876	1/2/2021	January	2021	Medicine and Surgery	Medicine	negative	bedsore	Staphylococcus haemolyticus								R					I	R	R		R
1877	1/2/2021	January	2021	Medicine and Surgery	Medicine	negative	bedsore	Staphylococcus capitis								R					R	R	S		R
1895	1/22/2021	January	2021	Medicine and Surgery	Medicine	negative	exudate	Escherichia coli	S	S	S	S	S		S	S	S		R	R		R	S	S	S
1905	1/23/2021	January	2021	Medicine and Surgery	Medicine	negative	sputum	Staphylococcus aureus								S					S	S	S		S
1909	1/24/2021	January	2021	Medicine and Surgery	Medicine	negative	blood	Escherichia coli	S	R	R	R	R		S	R	S			S		R	S		R
212	5/11/2020	May	2020	Neurology	Medicine	negative	catheter_urine	Klebsiella pneumoniae spp pneumoniae	S		S	S	S		I	S	S		S	S		S	S		S
213	5/11/2020	May	2020	Neurology	Medicine	negative	catheter_urine	Proteus mirabilis	S		S	S	S			S	S		S	S		S	R	R	S
280	5/25/2020	May	2020	Neurology	Medicine	negative	urine	Pseudomonas aeruginosa	S		S		R		R	R			R	R			R		R
281	5/25/2020	May	2020	Neurology	Medicine	negative	urine	Enterococcus faecium							R							R			R
312	5/31/2020	May	2020	Neurology	Medicine	negative	catheter_urine	Escherichia coli	S		S	S	S		S	S	S		R	S		R	S		S
379	6/14/2020	June	2020	Neurology	Medicine	negative	blood	Enterococcus faecalis							S							R
392	6/18/2020	June	2020	Neurology	Medicine	negative	catheter_urine	Enterococcus faecalis							S							R			R
659	7/31/2020	July	2020	Neurology	Medicine	negative	blood	Staphylococcus hominis													S	I	R		S
660	7/31/2020	July	2020	Neurology	Medicine	negative	urine	Klebsiella pneumoniae spp pneumoniae			S	S	S		S		S			S		R	S		S
661	7/31/2020	July	2020	Neurology	Medicine	positive	catheter_urine	Staphylococcus haemolyticus													R	S	S		S
704	8/1/2020	August	2020	Neurology	Medicine	negative	blood	Staphylococcus epidermidis													R	I	R		R
705	8/1/2020	August	2020	Neurology	Medicine	negative	blood	Staphylococcus hominis													S	I	R		R
716	8/11/2020	August	2020	Neurology	Medicine	negative	blood	Enterococcus faecium							R							R
717	8/11/2020	August	2020	Neurology	Medicine	negative	catheter_urine	Escherichia coli	I		R	R	R		S	R	S		R	I		S	S		R
746	8/14/2020	August	2020	Neurology	Medicine	positive	catheter_urine	Escherichia coli	S		S	S	S		S	S	S		S	S		S	S		S
747	8/14/2020	August	2020	Neurology	Medicine	positive	catheter_urine	Pseudomonas aeruginosa	S		S		S		S	S	S		S	S			S		S
748	8/14/2020	August	2020	Neurology	Medicine	positive	catheter_urine	Enterococcus faecalis							S							R			S
820	8/23/2020	August	2020	Neurology	Medicine	negative	venous_catheter	Staphylococcus epidermidis													S	S	S		S
859	8/3/2020	August	2020	Neurology	Medicine	negative	urine	Escherichia coli			S	S	S		S		S			S		S	S		S
860	8/3/2020	August	2020	Neurology	Medicine	negative	urine	Morganella morganii			S	S	S		I		S			S		S	S		S
991	9/2/2020	September	2020	Neurology	Medicine	negative	catheter_urine	Enterococcus faecalis							S							R			S
992	9/2/2020	September	2020	Neurology	Medicine	negative	catheter_urine	Klebsiella pneumoniae spp pneumoniae	S		S	S	S		S	S	S		S	S		S	S		S
993	9/2/2020	September	2020	Neurology	Medicine	negative	catheter_urine	Escherichia coli	S		S	S	S		S	S	S		S	S		S	S		S
1012	9/22/2020	September	2020	Neurology	Medicine	negative	urine	Escherichia coli			S	S	S		S		S			S		S	S		S
1013	9/22/2020	September	2020	Neurology	Medicine	negative	urine	Proteus mirabilis			S	S	S				S			S		R	R		R
1033	9/24/2020	September	2020	Neurology	Medicine	negative	urine	Enterococcus faecium							R							R			R
1044	9/25/2020	September	2020	Neurology	Medicine	negative	blood	Pseudomonas aeruginosa	R		R		R		R	R	R		R	R			S		R
1045	9/25/2020	September	2020	Neurology	Medicine	negative	urine	Escherichia coli			R	R	R		S		S			R		R	S		R
1046	9/25/2020	September	2020	Neurology	Medicine	negative	urine	Klebsiella pneumoniae spp pneumoniae			S	S	S		S		S			S		S	S		S
1067	9/28/2020	September	2020	Neurology	Medicine	negative	catheter_urine	Proteus mirabilis	S		S	S	S			I	S		S	S		S	R	R	I
1068	9/28/2020	September	2020	Neurology	Medicine	negative	catheter_urine	Enterococcus faecalis							S							R			S
1096	9/4/2020	September	2020	Neurology	Medicine	negative	catheter_urine	Proteus mirabilis	S		I	R	I			R	S		R	S		R	R	R	R
1097	9/4/2020	September	2020	Neurology	Medicine	negative	catheter_urine	Klebsiella pneumoniae spp pneumoniae	S		S	S	S		S	S	S		S	S		S	S		S
1137	9/9/2020	September	2020	Neurology	Medicine	negative	urine	Escherichia coli			S	S	S		S		S			S		S	S		S
1138	9/9/2020	September	2020	Neurology	Medicine	negative	urine	Enterococcus faecalis							S							R			S
1230	10/19/2020	October	2020	Neurology	Medicine	negative	catheter_urine	Pseudomonas aeruginosa	S	I	S	R	S		S	R	S			S		R	S		R
1243	10/20/2020	October	2020	Neurology	Medicine	positive	catheter_urine	Escherichia coli	S	S	S	S	S		S	S	S			S		S	S		S
1263	10/23/2020	October	2020	Neurology	Medicine	negative	catheter_urine	Citrobacter freundii	S	S	S	S	S		S	S	S		S	S	R	S	S	S	S
1321	10/7/2020	October	2020	Neurology	Medicine	negative	urine	Escherichia coli	I	S	I	R	I		S	R	S		S	I	R	R	S	R	R
1353	11/12/2020	November	2020	Neurology	Medicine	negative	catheter_urine	Proteus mirabilis	S	S	S	S	S		S	S	S			S		S	S		S
1453	11/25/2020	November	2020	Neurology	Medicine	negative	catheter_urine	Proteus mirabilis	S	S	S	S	S		I	S	S			S		S	S		S
1530	11/6/2020	November	2020	Neurology	Medicine	negative	catheter_urine	Escherichia coli	S	S	S	S	S		S	S	S			S		R	S		S
1531	11/6/2020	November	2020	Neurology	Medicine	negative	catheter_urine	Proteus mirabilis	S	S	S	S	S		S	S	S			S		R	S		R
1584	12/12/2020	December	2020	Neurology	Medicine	negative	urine	Escherichia coli	S		S	S	S		S	S		S		S		S	S	S	S
1585	12/12/2020	December	2020	Neurology	Medicine	negative	urine	Enterococcus faecalis								S					R	R	R		S
1885	1/20/2021	January	2021	Neurology	Medicine	negative	bronchoaspirate	Pseudomonas aeruginosa	I	I	S	R	S		S	S	S		S	S			R	S	S
672	7/6/2020	July	2020	Neurology – COVID	Medicine	positive	bronchoaspirate	Pseudomonas aeruginosa	S		R		R		S	S	S		R	R			S		S
673	7/6/2020	July	2020	Neurology – COVID	Medicine	positive	bronchoaspirate	Staphylococcus aureus													R	S	R		S
674	7/6/2020	July	2020	Neurology – COVID	Medicine	positive	bronchoaspirate	Escherichia coli	S		S	S	S		S	S	S		R	S		S	S		S
1527	11/6/2020	November	2020	Neurology – COVID	Medicine	positive	blood	Staphylococcus epidermidis								R					S	S	R		R
1528	11/6/2020	November	2020	Neurology – COVID	Medicine	positive	urine	Escherichia coli	S		S	S	S		S	S		S		S		S	S	S	S
27	3/31/2020	March	2020	Oncology	Medicine	negative	blood	Staphylococcus epidermidis													S	S	S		S
28	3/31/2020	March	2020	Oncology	Medicine	negative	blood	Staphylococcus auricularis													S	S	S		S
203	5/1/2020	May	2020	Oncology	Medicine	negative	urine	Klebsiella pneumoniae spp pneumoniae			S	S	S		S		S			S		S	S		S
233	5/14/2020	May	2020	Oncology	Medicine	negative	catheter_urine	Enterococcus faecalis							S							R			S
355	5/9/2020	May	2020	Oncology	Medicine	negative	sputum	Stenotrophomonas maltophila														S
377	6/13/2020	June	2020	Oncology	Medicine	negative	urine	Enterococcus faecalis							S							R
399	6/20/2020	June	2020	Oncology	Medicine	negative	catheter_urine	Proteus mirabilis	S		S	S	S			S	S		S	S		S	R	R	S
449	6/3/2020	June	2020	Oncology	Medicine	negative	blood	Achromobacter spp.	R		R		S		S	R			S	S			R		R
450	6/3/2020	June	2020	Oncology	Medicine	negative	urine	Escherichia coli			S	S	S		S		S			S		S	S		R
464	6/5/2020	June	2020	Oncology	Medicine	negative	bronchoaspirate	Citrobacter youngae	S		S	R	R		S	S	S		R	S		S	S		S
465	6/5/2020	June	2020	Oncology	Medicine	negative	urine	Escherichia coli			S	S	S		S		S			S		R	S		R
550	7/19/2020	July	2020	Oncology	Medicine	negative	urine	Escherichia coli			S	S	S		S		S			S		S	S		I
584	7/22/2020	July	2020	Oncology	Medicine	negative	venous_catheter	Staphylococcus epidermidis													S	S	S		R
585	7/22/2020	July	2020	Oncology	Medicine	negative	urine	Staphylococcus haemolyticus													S	S	R		R
598	7/24/2020	July	2020	Oncology	Medicine	negative	bronchus_lavage	Staphylococcus epidermidis													R	S	R		R
627	7/28/2020	July	2020	Oncology	Medicine	positive	venous_catheter	Staphylococcus hominis													R	S	S		S
693	7/8/2020	July	2020	Oncology	Medicine	negative	urine	Escherichia coli			R	S	S		S		I			S		R	R		I
782	8/19/2020	August	2020	Oncology	Medicine	positive	ureter	Serratia marcescens	I		S	S	S		S	S	S		S	S		S	S	R	S
813	8/22/2020	August	2020	Oncology	Medicine	positive	urine	Klebsiella pneumoniae spp pneumoniae	R		R	R	R	R	R	R	R			R		S	R		R
861	8/3/2020	August	2020	Oncology	Medicine	negative	venous_catheter	Staphylococcus epidermidis													S	S	S		R
888	8/4/2020	August	2020	Oncology	Medicine	negative	sputum	Stenotrophomonas maltophila														S
931	9/11/2020	September	2020	Oncology	Medicine	positive	blood	Staphylococcus haemolyticus													S	S	R		R
946	9/14/2020	September	2020	Oncology	Medicine	negative	blood	Staphylococcus aureus													S	S	S		S
965	9/17/2020	September	2020	Oncology	Medicine	negative	bronchus_lavage	Staphylococcus epidermidis													S	S	S		S
994	9/2/2020	September	2020	Oncology	Medicine	negative	catheter_urine	Enterococcus faecalis							S							R			S
1014	9/22/2020	September	2020	Oncology	Medicine	negative	urine	Enterococcus faecium							R							R			R
1047	9/25/2020	September	2020	Oncology	Medicine	negative	urine	Enterococcus faecalis							R							R			R
1079	9/3/2020	September	2020	Oncology	Medicine	negative	venous_catheter	Staphylococcus epidermidis													R	S	R		R
1176	10/12/2020	October	2020	Oncology	Medicine	negative	blood	Staphylococcus epidermidis								S					S	S	S		S
1199	10/15/2020	October	2020	Oncology	Medicine	negative	urine	Klebsiella pneumoniae	S	S	S	S	S		S	S	S		R	S	R	S	S	S	S
1240	10/2/2020	October	2020	Oncology	Medicine	negative	catheter_urine	Escherichia coli	S	S	S	S	S		S	S	S		R	S	R	R	S	S	S
1249	10/21/2020	October	2020	Oncology	Medicine	negative	catheter	Staphylococcus warneri								R					S	S	R		R
1250	10/21/2020	October	2020	Oncology	Medicine	negative	catheter	Staphylococcus aureus								S					S	S	R		S
1251	10/21/2020	October	2020	Oncology	Medicine	negative	cutaneous_lesion	Staphylococcus aureus								S					S	S	S		S
1252	10/21/2020	October	2020	Oncology	Medicine	positive	urine	Escherichia coli	S	S	S	S	S		S	S	S		S	S	R	S	S	S	S
1329	10/8/2020	October	2020	Oncology	Medicine	positive	urine	Escherichia coli	S	S	S	S	S		S	S	S		R	S	R	S	S	S	S
1411	11/20/2020	November	2020	Oncology	Medicine	positive	venous_catheter	Staphylococcus auricularis								S					S	S	R		S
1436	11/23/2020	November	2020	Oncology	Medicine	negative	urine	Morganella morganii	S		S		I		I	S		S		S		S	S	R	R
1446	11/24/2020	November	2020	Oncology	Medicine	positive	urine	Escherichia coli	S		R	R	R		S	S		R		S		R	S	S	R
1470	11/27/2020	November	2020	Oncology	Medicine	positive	blood	Staphylococcus aureus								S					S	S	S		S
1475	11/29/2020	November	2020	Oncology	Medicine	positive	pus	Staphylococcus haemolyticus								R					S	R	R		R
1482	11/3/2020	November	2020	Oncology	Medicine	negative	urine	Escherichia coli	S	S	S	S	S		S	R	S		R	S	R	S	S	R	R
1520	11/5/2020	November	2020	Oncology	Medicine	positive	urine	Staphylococcus auricularis								R					R	R	R		R
1588	12/13/2020	December	2020	Oncology	Medicine	negative	pleura_liquid	Enterococcus gallinarum													S	R	R
1589	12/13/2020	December	2020	Oncology	Medicine	negative	urine	Escherichia coli	S		S	S	S		S	S		R		S		S	S	S	R
1631	12/18/2020	December	2020	Oncology	Medicine	positive	exudate	Staphylococcus aureus								R					S	S	S		R
1633	12/19/2020	December	2020	Oncology	Medicine	negative	urine	Escherichia coli	S		S	S	S		S	S		S		S		S	S	S	S
1641	12/2/2020	December	2020	Oncology	Medicine	positive	catheter_urine	Escherichia coli	S	S	S	S	S		S	S	S		S	S		S	S	S	S
1642	12/2/2020	December	2020	Oncology	Medicine	positive	catheter_urine	Enterococcus faecalis								S					R	R	R		S
1668	12/23/2020	December	2020	Oncology	Medicine	positive	urine	Escherichia coli	S		S	S	S		S	S		S		S		S	S	S	S
1684	12/24/2020	December	2020	Oncology	Medicine	negative	blood	Staphylococcus epidermidis								R					S	S	S		S
1685	12/24/2020	December	2020	Oncology	Medicine	negative	blood	Staphylococcus aureus								R					S	S	S		R
1723	12/29/2020	December	2020	Oncology	Medicine	negative	urine	Enterococcus faecalis								S					R	R	R		S
1823	1/13/2021	January	2021	Oncology	Medicine	negative	pus	Staphylococcus aureus								S					S	S	R		S
1824	1/13/2021	January	2021	Oncology	Medicine	positive	urine	Staphylococcus epidermidis								R					S	S	R		R
1825	1/13/2021	January	2021	Oncology	Medicine	positive	urine	Pseudomonas aeruginosa	S		S	R	R		S	S				S			S	S	S
1826	1/13/2021	January	2021	Oncology	Medicine	positive	urine	Enterococcus faecalis								S					R	R	R		S
1827	1/13/2021	January	2021	Oncology	Medicine	positive	urine	Serratia marcescens	S		S		R		S	S		S		S		S	S	R	S
1835	1/14/2021	January	2021	Oncology	Medicine	negative	urine	Proteus mirabilis	S		S	S	S		S	S		R		S		R	S	R	R
1836	1/14/2021	January	2021	Oncology	Medicine	negative	urine	Klebsiella pneumoniae	S		R	R	I		S	R		R		S		R	I	R	R
1837	1/14/2021	January	2021	Oncology	Medicine	negative	urine	Enterococcus faecalis								S					S	R	R		S
1864	1/18/2021	January	2021	Oncology	Medicine	positive	blood	Staphylococcus aureus								S					S	S	S		S
1898	1/22/2021	January	2021	Oncology	Medicine	negative	urine	Pseudomonas aeruginosa	S		S	R	S		R	R				S			R	S	R
1943	1/29/2021	January	2021	Oncology	Medicine	negative	urine	Enterobacter cloacae	R		R	R	R		S	S		R		R		S	R		S
1956	1/4/2021	January	2021	Oncology	Medicine	negative	urine	Enterococcus faecalis								R					I	R	R		R
1972	1/6/2021	January	2021	Oncology	Medicine	positive	catheter_urine	Enterococcus faecalis								R					R	R	R		R
1995	1/8/2021	January	2021	Oncology	Medicine	negative	urine	Escherichia coli	S		S	S	S		S	S		S		S		S	S	S	S
6	3/26/2020	March	2020	Pneumology	Medicine	negative	urine	Klebsiella pneumoniae spp pneumoniae			R	R	R		S		S			S		R	S		S
39	4/10/2020	April	2020	Pneumology	Medicine	negative	sputum	Staphylococcus aureus													S	S	S		S
49	4/12/2020	April	2020	Pneumology	Medicine	negative	blood	Staphylococcus hominis													S	S	S		S
70	4/15/2020	April	2020	Pneumology	Medicine	negative	urine	Escherichia coli			S	S	S		S		S			S		S	S		S
79	4/16/2020	April	2020	Pneumology	Medicine	negative	venous_catheter	Staphylococcus epidermidis													S	R	R		R
98	4/2/2020	April	2020	Pneumology	Medicine	negative	bronchoaspirate	Pseudomonas aeruginosa	S		S		S		S	S	S		S	S			S		S
119	4/23/2020	April	2020	Pneumology	Medicine	positive	rectal_tampon	Klebsiella pneumoniae spp pneumoniae	R		R	R	R		R	R	R		R	R		R	R		R
120	4/23/2020	April	2020	Pneumology	Medicine	positive	rectal_tampon	Enterobacter cloacae	S		R	R	R		R	R	I		R	R		R	R		R
127	4/24/2020	April	2020	Pneumology	Medicine	negative	bronchus_lavage	Enterococcus faecalis							S							R
128	4/24/2020	April	2020	Pneumology	Medicine	negative	bronchus_lavage	Pseudomonas aeruginosa	S		S		S		S	S	S		S	S			S		S
204	5/1/2020	May	2020	Pneumology	Medicine	negative	sputum	Klebsiella pneumoniae spp pneumoniae
205	5/1/2020	May	2020	Pneumology	Medicine	negative	catheter_urine	Enterococcus faecium							R							R			R
214	5/11/2020	May	2020	Pneumology	Medicine	positive	blood	Staphylococcus capitis													S	S	S		R
226	5/13/2020	May	2020	Pneumology	Medicine	negative	venous_catheter	Staphylococcus epidermidis													I	R	R		R
227	5/13/2020	May	2020	Pneumology	Medicine	positive	blood	Staphylococcus haemolyticus													S	R	R		R
234	5/14/2020	May	2020	Pneumology	Medicine	negative	blood	Staphylococcus epidermidis													R	S	R		R
324	5/5/2020	May	2020	Pneumology	Medicine	negative	rectal_tampon	Klebsiella pneumoniae spp pneumoniae	R		R	R	R		R	R	R		R	R		S	R		R
328	5/6/2020	May	2020	Pneumology	Medicine	negative	bronchoaspirate	Serratia marcescens	S		S	S	S		S	S	S		S	S		S	S	R	S
356	5/9/2020	May	2020	Pneumology	Medicine	negative	catheter_urine	Enterobacter aerogenes	S		S	R	R		S	S	S		R	R		S	S		S
376	6/12/2020	June	2020	Pneumology	Medicine	negative	sputum	Stenotrophomonas maltophila														S
385	6/16/2020	June	2020	Pneumology	Medicine	positive	sputum	Pseudomonas aeruginosa	R	I		R	S		S	R				S			R		R
393	6/18/2020	June	2020	Pneumology	Medicine	negative	venous_catheter	Staphylococcus epidermidis													R	S	R		R
412	6/23/2020	June	2020	Pneumology	Medicine	negative	catheter_urine	Enterococcus faecalis							S							R			S
427	6/26/2020	June	2020	Pneumology	Medicine	negative	sputum	Staphylococcus aureus													S	S	S		R
428	6/26/2020	June	2020	Pneumology	Medicine	negative	sputum	Stenotrophomonas maltophila														S
490	7/1/2020	July	2020	Pneumology	Medicine	negative	vaginal_secretion	Escherichia coli	S		S	S	S		I	S	S		R	S		S	R	R	S
523	7/16/2020	July	2020	Pneumology	Medicine	negative	sputum	Proteus mirabilis	S		S	S	S			R	S		I	S		R	R	R	R
524	7/16/2020	July	2020	Pneumology	Medicine	positive	catheter_urine	Escherichia coli	S		S	S	S		S	S	S		S	S		S	S		S
525	7/16/2020	July	2020	Pneumology	Medicine	positive	catheter_urine	Morganella morganii	S		S	R	R		I	R	S			S		R	S	R	R
562	7/2/2020	July	2020	Pneumology	Medicine	negative	sputum	Enterobacter cloacae	S		S	S	S		S	S	S		R	S		R	S		S
563	7/2/2020	July	2020	Pneumology	Medicine	negative	rectal_tampon	Klebsiella pneumoniae spp pneumoniae	S		R	R	R	R	R	R	I		R	R		R	R		R
586	7/22/2020	July	2020	Pneumology	Medicine	negative	venous_catheter	Klebsiella pneumoniae spp pneumoniae	S		S		S	S	S	S	S			S		S	S		S
587	7/22/2020	July	2020	Pneumology	Medicine	negative	catheter_urine	Providencia stuartii	S		S	S	S		S	S	S		S	S		S	I	R	S
593	7/23/2020	July	2020	Pneumology	Medicine	negative	sputum	Streptococcus intermedius			R	R					R
594	7/23/2020	July	2020	Pneumology	Medicine	negative	sputum	Staphylococcus epidermidis													S	S	R		R
628	7/28/2020	July	2020	Pneumology	Medicine	negative	blood	Staphylococcus aureus													S	S	S		S
706	8/1/2020	August	2020	Pneumology	Medicine	negative	sputum	Staphylococcus haemolyticus													S	R	R		R
707	8/1/2020	August	2020	Pneumology	Medicine	negative	sputum	Pseudomonas aeruginosa	S		S		S		S	S	S		S	S			S		S
713	8/10/2020	August	2020	Pneumology	Medicine	positive	bronchus_lavage	Pseudomonas aeruginosa	S		R		R		R	S	R		R	R			S		S
718	8/11/2020	August	2020	Pneumology	Medicine	positive	catheter	Staphylococcus capitis													S	R	R		R
724	8/12/2020	August	2020	Pneumology	Medicine	negative	bronchus_lavage	Klebsiella pneumoniae spp pneumoniae	R		R	R	R		R	R	R		R	R		R	I		R
725	8/12/2020	August	2020	Pneumology	Medicine	negative	bronchus_lavage	Staphylococcus aureus													S	S	S		R
726	8/12/2020	August	2020	Pneumology	Medicine	negative	sputum	Achromobacter spp.	R	R		R			R		R						R	R	R
727	8/12/2020	August	2020	Pneumology	Medicine	negative	sputum	Staphylococcus haemolyticus													I	R	R		R
728	8/12/2020	August	2020	Pneumology	Medicine	negative	sputum	Corynebacterium jeikeium													R		R		R
729	8/12/2020	August	2020	Pneumology	Medicine	negative	catheter_urine	Pseudomonas aeruginosa	S		S		S		S	S	S		S	S			S		S
737	8/13/2020	August	2020	Pneumology	Medicine	negative	bronchoaspirate	Proteus mirabilis	S		I	R	S			R	S		R	S		R	I	R	R
738	8/13/2020	August	2020	Pneumology	Medicine	negative	catheter_urine	Klebsiella pneumoniae spp pneumoniae	R		R	R	R		R	R	R		R	R		R	I		R
749	8/14/2020	August	2020	Pneumology	Medicine	negative	sputum	Staphylococcus aureus													S	S	S		R
750	8/14/2020	August	2020	Pneumology	Medicine	negative	sputum	Achromobacter spp.	R		R		S		S	R			S	S			R		R
770	8/17/2020	August	2020	Pneumology	Medicine	negative	blood	Escherichia coli	I		R	R	R		S	R	S		R	R		R	S		R
783	8/19/2020	August	2020	Pneumology	Medicine	negative	urine	Proteus vulgaris/penneri			S	S	S		I		S			S		S	S		S
784	8/19/2020	August	2020	Pneumology	Medicine	negative	urine	Klebsiella pneumoniae spp pneumoniae			R	R	R		S		S			S		R	S		I
840	8/26/2020	August	2020	Pneumology	Medicine	negative	sputum	Staphylococcus haemolyticus													S	S	R		R
851	8/28/2020	August	2020	Pneumology	Medicine	positive	bronchoaspirate	Corynebacterium amycolatum																	R
852	8/28/2020	August	2020	Pneumology	Medicine	positive	catheter_urine	Escherichia coli	S		S	S	S		S	S	S		S	S		S	S		S
854	8/29/2020	August	2020	Pneumology	Medicine	positive	blood	Staphylococcus epidermidis													S	R	R		R
855	8/29/2020	August	2020	Pneumology	Medicine	positive	catheter_urine	Klebsiella pneumoniae spp pneumoniae	I		R	R	R		S	S	S		R	I		R	S		S
893	8/6/2020	August	2020	Pneumology	Medicine	negative	sputum	Achromobacter spp.	R		R		R		S	R			S	S			R		R
932	9/11/2020	September	2020	Pneumology	Medicine	negative	sputum	Pseudomonas aeruginosa	R	R	R	R	R		R	R	S		R	R
971	9/18/2020	September	2020	Pneumology	Medicine	negative	sputum	Pseudomonas aeruginosa	S		S		S		S	S	S		S	S			S		S
972	9/18/2020	September	2020	Pneumology	Medicine	negative	sputum	Corynebacterium matruchotii													R				R
973	9/18/2020	September	2020	Pneumology	Medicine	negative	sputum	Pseudomonas aeruginosa	S		R		R		S	S	S		R	R			S		S
985	9/19/2020	September	2020	Pneumology	Medicine	positive	cutaneous_lesion	Staphylococcus haemolyticus													I	R	R		R
1015	9/22/2020	September	2020	Pneumology	Medicine	positive	rectal_tampon	Klebsiella oxytoca	S		R	R	R		R	R	I		R	R		R	R		R
1048	9/25/2020	September	2020	Pneumology	Medicine	negative	sputum	Pseudomonas aeruginosa	S		S		S		S	R	S		S	S			S		R
1057	9/27/2020	September	2020	Pneumology	Medicine	negative	bronchoaspirate	Pseudomonas aeruginosa	S		S		R		S	S	S		R	R			S		S
1083	9/30/2020	September	2020	Pneumology	Medicine	negative	sputum	Staphylococcus aureus								R					S	S	R		R
1084	9/30/2020	September	2020	Pneumology	Medicine	negative	sputum	Escherichia coli	S	S		S	S		S	R	S			R		R	S		R
1106	9/5/2020	September	2020	Pneumology	Medicine	negative	venous_catheter	Staphylococcus epidermidis													S	R	R		R
1111	9/6/2020	September	2020	Pneumology	Medicine	negative	catheter_urine	Enterococcus faecium							R							R			R
1131	9/8/2020	September	2020	Pneumology	Medicine	positive	blood	Pseudomonas aeruginosa	S		S		S		R	S	I		S	S			S		S
1139	9/9/2020	September	2020	Pneumology	Medicine	negative	blood	Staphylococcus epidermidis													S	R	R		R
1163	10/11/2020	October	2020	Pneumology	Medicine	negative	venous_catheter	Staphylococcus epidermidis								R						R	R		R
1164	10/11/2020	October	2020	Pneumology	Medicine	negative	urine	Enterobacter cloacae	R	R	R	R			S	R	I		R	R			R		R
1177	10/12/2020	October	2020	Pneumology	Medicine	positive	catheter_urine	Klebsiella pneumoniae	I	R	R	R	R		S	S	S		R	S	R	R	S	S	S
1184	10/13/2020	October	2020	Pneumology	Medicine	negative	sputum	Klebsiella pneumoniae	S	S	S	S	S		S	S	S			S		S	S		S
1185	10/13/2020	October	2020	Pneumology	Medicine	negative	sputum	Enterobacter cloacae	S	S	S	S	S		S	S	S			S		S	S		S
1190	10/14/2020	October	2020	Pneumology	Medicine	positive	urine	Klebsiella pneumoniae	S	S	S	S	S		S	S	S		R	S	R	S	S	S	S
1241	10/2/2020	October	2020	Pneumology	Medicine	negative	catheter_urine	Enterobacter cloacae	S	R	I	R	R		S	S	S		R	R	R	S	S		S
1260	10/22/2020	October	2020	Pneumology	Medicine	positive	blood	Staphylococcus lugdunensis								S					S	S	S		S
1273	10/25/2020	October	2020	Pneumology	Medicine	positive	blood	Enterobacter cloacae	S	S	S	S	S		S	S	S			S		R	S		S
1274	10/25/2020	October	2020	Pneumology	Medicine	positive	urine	Staphylococcus epidermidis								R					S	S	R		R
1291	10/29/2020	October	2020	Pneumology	Medicine	positive	urine	Enterococcus faecium								S					R	R	R		S
1330	10/8/2020	October	2020	Pneumology	Medicine	positive	pus	Morganella morganii	S	S	S		R		S	S	S			S		S	S		S
1360	11/13/2020	November	2020	Pneumology	Medicine	positive	bronchoaspirate	Stenotrophomonas maltophila														S
1454	11/25/2020	November	2020	Pneumology	Medicine	positive	blood	Staphylococcus aureus								S					S	S	R		S
1455	11/25/2020	November	2020	Pneumology	Medicine	positive	urine	Escherichia coli	S		S	S	I		S	S		S		S		S	S	R	S
1456	11/25/2020	November	2020	Pneumology	Medicine	positive	urine	Proteus mirabilis	S	S	S	S	S		S	S	S		R	S		R	S	R	S
1508	11/4/2020	November	2020	Pneumology	Medicine	positive	sputum	Serratia marcescens	S	R	S		R		S	S	S			R		S	S		S
1555	11/9/2020	November	2020	Pneumology	Medicine	negative	sputum	Staphylococcus aureus								R					S	S	R		R
1562	12/1/2020	December	2020	Pneumology	Medicine	negative	sputum	Staphylococcus aureus								R					S	S	S		R
1563	12/1/2020	December	2020	Pneumology	Medicine	negative	sputum	Stenotrophomonas maltophila														S
1643	12/2/2020	December	2020	Pneumology	Medicine	positive	urine	Citrobacter koseri	S		S	S	S		S	S		S		S		S	S	S	S
1654	12/21/2020	December	2020	Pneumology	Medicine	positive	catheter_urine	Klebsiella oxytoca	R	S	S	S	S		S	S	S		S	S		S	R	S	S
1661	12/22/2020	December	2020	Pneumology	Medicine	positive	blood	Escherichia coli	S	R	R	R	R		S	S	S			R		R	S		S
1669	12/23/2020	December	2020	Pneumology	Medicine	negative	blood	Escherichia coli	S	S	S	S	S		S	S	S			S		R	S		R
1713	12/28/2020	December	2020	Pneumology	Medicine	positive	urine	Klebsiella pneumoniae	R		R	R	R		R	R		S		R		S	R	S	R
1724	12/29/2020	December	2020	Pneumology	Medicine	positive	urine	Enterococcus faecalis								R					R	R	R		R
1748	12/31/2020	December	2020	Pneumology	Medicine	positive	urine	Enterococcus faecalis								R					R	R	R		R
1781	12/9/2020	December	2020	Pneumology	Medicine	positive	bronchoaspirate	Proteus mirabilis	S	R	I	R	I		S	S	S			S		R	S		R
1785	1/1/2021	January	2021	Pneumology	Medicine	positive	catheter_urine	Pseudomonas aeruginosa	S	I	S	R	S		I	S	I		S	S	R		S	S	S	R
1799	1/10/2021	January	2021	Pneumology	Medicine	positive	urine	Klebsiella oxytoca	R	R	R	R	R		R	R	R	R	R	R		R	S	S	R
1819	1/12/2021	January	2021	Pneumology	Medicine	positive	urine	Enterobacter cloacae	S		R	R	R		S	R		R		R		R	R		R
1828	1/13/2021	January	2021	Pneumology	Medicine	positive	catheter_urine	Proteus mirabilis	S	S	S	S	S		S	S	S		R	S		S	R	R	S
1849	1/16/2021	January	2021	Pneumology	Medicine	positive	rectal_tampon	Klebsiella pneumoniae	R	R	R	R	R		R	R	R			R		R	R		R
1872	1/19/2021	January	2021	Pneumology	Medicine	positive	blood	Staphylococcus epidermidis								R					S	R	R		R
1927	1/25/2021	January	2021	Pneumology	Medicine	negative	blood	Staphylococcus hominis spp. hominis								S					S	S	S		S
1945	1/3/2021	January	2021	Pneumology	Medicine	positive	urine	Escherichia coli	S		I	R	I		S	R		R		S		R	S	S	R
1946	1/3/2021	January	2021	Pneumology	Medicine	positive	urine	Enterococcus faecalis								R					R	R	R		R
1962	1/5/2021	January	2021	Pneumology	Medicine	negative	sputum	Pseudomonas aeruginosa	S	S		R	S		S	S	S			S			S		R
1996	1/8/2021	January	2021	Pneumology	Medicine	positive	urine	Klebsiella pneumoniae	R		R	R	R		R	R		R		R		R	S	S	R
85	4/17/2020	April	2020	Psychiatry	Medicine	negative	urine	Proteus mirabilis			S	R	R				S			S		S	R		R
238	5/15/2020	May	2020	Psychiatry	Medicine	negative	urine	Escherichia coli			S	S	S		S		S			S		S	S		S
329	5/6/2020	May	2020	Psychiatry	Medicine	negative	catheter_urine	Klebsiella pneumoniae spp pneumoniae	S		S	S	S		S	S	S		S	S		S	S		S
330	5/6/2020	May	2020	Psychiatry	Medicine	negative	catheter_urine	Proteus mirabilis	S		S	S	S			S	S		S	S		S	R	R	S
1140	9/9/2020	September	2020	Psychiatry	Medicine	negative	blood	Klebsiella pneumoniae spp pneumoniae	S		S	S	S		S	S	S		I	S		S	S		S
1331	10/8/2020	October	2020	Psychiatry	Medicine	positive	blood	Staphylococcus aureus								R					S	S	S		R
1632	12/18/2020	December	2020	Psychiatry	Medicine	positive	blood	Staphylococcus aureus								S					S	S	S		S
1786	1/1/2021	January	2021	Psychiatry	Medicine	negative	catheter_urine	Enterococcus faecalis								S					R	R	R		S
1890	1/21/2021	January	2021	Psychiatry	Medicine	positive	bronchoaspirate	Pseudomonas aeruginosa	S	I	S	R	S		S	S	S		S	S			S	S	S
1928	1/25/2021	January	2021	Psychiatry	Medicine	positive	urine	Klebsiella pneumoniae	S	R	R	R	R		R	R	R	R	R	R		R	R	S	R
1929	1/25/2021	January	2021	Psychiatry	Medicine	positive	urine	Escherichia coli	S		R	R	R		S	R		R		S		S	S	S	R
1931	1/26/2021	January	2021	Psychiatry	Medicine	negative	urine	Proteus mirabilis	S		S	S	S		S	S		R		S		R	R	R	R
8	3/27/2020	March	2020	Rehabilitation	Medicine	negative	venous_catheter	Staphylococcus epidermidis													S	R	R		R
113	4/22/2020	April	2020	Rehabilitation	Medicine	negative	bronchoaspirate	Pseudomonas aeruginosa	R		R		R		R	R	R		R	R			R		R
132	4/25/2020	April	2020	Rehabilitation	Medicine	negative	bronchoaspirate	Pseudomonas aeruginosa	S		S		S		S	S	S		S	S			S		S
133	4/25/2020	April	2020	Rehabilitation	Medicine	negative	bronchoaspirate	Staphylococcus aureus													S	S	S		R
146	4/29/2020	April	2020	Rehabilitation	Medicine	negative	bronchoaspirate	Escherichia coli	I		I	R	S		R	R	S		R	S		R	R	R	R
147	4/29/2020	April	2020	Rehabilitation	Medicine	negative	catheter_urine	Escherichia coli	S		S	R	S		S	R	S		R	S		S	S		R
305	5/3/2020	May	2020	Rehabilitation	Medicine	negative	urine	Escherichia coli			S	S	S		S		S			S		S	S		S
432	6/28/2020	June	2020	Rehabilitation	Medicine	negative	urine	Escherichia coli			R	R	R		S		S			S		R	R		R
455	6/30/2020	June	2020	Rehabilitation	Medicine	negative	bronchoaspirate	Staphylococcus aureus													S	S	S		R
456	6/30/2020	June	2020	Rehabilitation	Medicine	negative	bronchoaspirate	Proteus mirabilis	I		I	R	S			R	S		R	S		R	R	R	R
457	6/30/2020	June	2020	Rehabilitation	Medicine	negative	bronchoaspirate	Klebsiella pneumoniae spp pneumoniae	S		S	S	S		S	S	S		R	S		S	S		S
459	6/4/2020	June	2020	Rehabilitation	Medicine	negative	bronchoaspirate	Escherichia coli	S		S	S	S		S	S	S		S	S		S	S		S
559	7/2/2020	July	2020	Rehabilitation	Medicine	negative	catheter_urine	Escherichia coli	S		S	R	S		S	R	S		R	S		S	S		R
625	7/28/2020	July	2020	Rehabilitation	Medicine	positive	catheter_urine	Escherichia coli	S		S	R	I		S	R	S		R	S		S	S		R
711	8/10/2020	August	2020	Rehabilitation	Medicine	negative	bronchoaspirate	Pseudomonas aeruginosa	S		S		R		R	R	R		R	R			S		S
889	8/5/2020	August	2020	Rehabilitation	Medicine	negative	urine	Escherichia coli			S	S	S		S		S			S		S	S		S
1004	9/21/2020	September	2020	Rehabilitation	Medicine	negative	venous_catheter	Enterobacter aerogenes	S		S	S	S		S	S	S		S	S		S	S		S
1052	9/26/2020	September	2020	Rehabilitation	Medicine	negative	catheter_urine	Klebsiella pneumoniae spp pneumoniae	S		S	S	S		S	S	S		S	S		S	S		S
1094	9/4/2020	September	2020	Rehabilitation	Medicine	negative	catheter_urine	Staphylococcus aureus													S	S	S		R
1095	9/4/2020	September	2020	Rehabilitation	Medicine	negative	catheter_urine	Proteus mirabilis	S		S	S	S			R			R	S		S	R	R	R
1268	10/24/2020	October	2020	Rehabilitation	Medicine	positive	urine	Klebsiella pneumoniae	R	R	R	R	R		S	R	I		R	R	R	R	R	R	R
1380	11/16/2020	November	2020	Rehabilitation	Medicine	negative	bronchoaspirate	Serratia marcescens	S	S	S		S		S	S	S			S		S	S		S
1381	11/16/2020	November	2020	Rehabilitation	Medicine	negative	bronchoaspirate	Staphylococcus aureus								R					R	R	R		R
1386	11/17/2020	November	2020	Rehabilitation	Medicine	negative	catheter_urine	Providencia rettgeri	S	S	S	S	S		S	S	S		S	S		S	S	R	S
1387	11/17/2020	November	2020	Rehabilitation	Medicine	negative	catheter_urine	Enterococcus faecalis								S					R	R	R		S
1445	11/24/2020	November	2020	Rehabilitation	Medicine	positive	catheter_urine	Escherichia coli	S	R	R	R	R		I	R	S		R	R		I	R	S	R
1480	11/3/2020	November	2020	Rehabilitation	Medicine	negative	bronchoaspirate	Staphylococcus aureus								R					S	S	S		R
1481	11/3/2020	November	2020	Rehabilitation	Medicine	negative	bronchoaspirate	Pseudomonas aeruginosa	I			R	S		S	R	S			S		R	S		R
1506	11/4/2020	November	2020	Rehabilitation	Medicine	negative	bronchoaspirate	Pseudomonas aeruginosa	I	I		R	S		R	R	R			S		R	R		S
1507	11/4/2020	November	2020	Rehabilitation	Medicine	negative	bronchoaspirate	Enterobacter aerogenes	S	S	S	S	S		S	S	S			S		S	S		S
1578	12/11/2020	December	2020	Rehabilitation	Medicine	negative	bronchoaspirate	Pseudomonas aeruginosa	S	I	S	R	S		S	R	S			S			S		R
1579	12/11/2020	December	2020	Rehabilitation	Medicine	negative	bronchoaspirate	Staphylococcus aureus								R					S	S	S		R
1580	12/11/2020	December	2020	Rehabilitation	Medicine	negative	bronchoaspirate	Proteus mirabilis	S	S	S	S	S		I	S	S			S		S	R		R
1606	12/15/2020	December	2020	Rehabilitation	Medicine	negative	catheter_urine	Escherichia coli	S	S	S	S	S		S	R	S		R	S		R	S	S	R
1629	12/18/2020	December	2020	Rehabilitation	Medicine	negative	bronchoaspirate	Providencia rettgeri	S	R	I	S	R		S	S	S			S		S	S		S
1639	12/2/2020	December	2020	Rehabilitation	Medicine	positive	catheter_urine	Escherichia coli	S	S	S	S	S		S	S	S		R	S		R	S	S	S
1665	12/23/2020	December	2020	Rehabilitation	Medicine	negative	blood	Pseudomonas aeruginosa	R		R	R	R		R	R	R		R	R			R	R	R
1698	12/27/2020	December	2020	Rehabilitation	Medicine	negative	urine	Escherichia coli	S		S	S	I		S	S		R		S		R	S	S	S
1719	12/29/2020	December	2020	Rehabilitation	Medicine	negative	catheter_urine	Escherichia coli	S	S	S	S	S		S	S	S		S	S		S	S	S	S
1720	12/29/2020	December	2020	Rehabilitation	Medicine	negative	catheter_urine	Enterococcus faecalis								S					S	R	R		S
1991	1/8/2021	January	2021	Rehabilitation	Medicine	negative	blood	Pseudomonas aeruginosa	S	I	S	R	S		S	R	S			S			S		S
1992	1/8/2021	January	2021	Rehabilitation	Medicine	negative	blood	Enterobacter aerogenes	S	S	S	S	S		S	S	S			S		S	S		S
1993	1/8/2021	January	2021	Rehabilitation	Medicine	negative	catheter_urine	Klebsiella oxytoca	S	I	S	R	I		S	S	S		R	S		S	S	S	R
25	3/30/2020	March	2020	General surgery	surgery	negative	peritoneal_liquid	Escherichia coli	S		S	S	S		S	S	S		R	R		R	S		S
80	4/16/2020	April	2020	General surgery	surgery	positive	blood	Staphylococcus capitis													S	S	S		S
171	4/5/2020	April	2020	General surgery	surgery	negative	ascites	Pseudomonas aeruginosa	S		S		S		S	S	S		S	S			S		S
172	4/5/2020	April	2020	General surgery	surgery	negative	ascites	Enterococcus faecium							R							R
184	4/6/2020	April	2020	General surgery	surgery	positive	cavitary_liquid	Escherichia coli	I		R	R	R		S	R	S		R	I		S	S		R
185	4/6/2020	April	2020	General surgery	surgery	positive	cavitary_liquid	Morganella morganii	S		S	S	S		S	S	S			S		S	R	R	S
282	5/25/2020	May	2020	General surgery	surgery	negative	surgical_wound	Enterobacter cloacae	S		S	S	S		S	S	S		S	S		S	S		S
283	5/25/2020	May	2020	General surgery	surgery	negative	blood	Klebsiella oxytoca	S		S	S	S		S	S	S		S	S		S	S		S
288	5/26/2020	May	2020	General surgery	surgery	negative	bile	Enterococcus faecalis							S							R
331	5/6/2020	May	2020	General surgery	surgery	negative	peritoneal_liquid	Escherichia coli	S		R	R	R		S	R	S		R	S		R	R		R
341	5/7/2020	May	2020	General surgery	surgery	negative	peritoneal_liquid	Streptococcus dysgalactiae spp. equisimilis								S					S					S
342	5/7/2020	May	2020	General surgery	surgery	negative	peritoneal_liquid	Escherichia coli	S		S	S	S		S	S	S		S	S		S	S		S
382	6/15/2020	June	2020	General surgery	surgery	negative	catheter_urine	Enterococcus faecalis							S							R			R
410	6/22/2020	June	2020	General surgery	surgery	negative	urine	Escherichia coli			S	S	S		S		S			S		S	S		S
429	6/26/2020	June	2020	General surgery	surgery	negative	peritoneal_liquid	Citrobacter koseri	S		S	S	S		S	S	S		S	S		S	S		S
496	7/10/2020	July	2020	General surgery	surgery	negative	bile	Staphylococcus haemolyticus													I	R	R		R
506	7/13/2020	July	2020	General surgery	surgery	negative	drainage_liquid	Pseudomonas aeruginosa	S		S		S		S	S	S		S	S			S		S
601	7/25/2020	July	2020	General surgery	surgery	negative	catheter	Staphylococcus hominis													S	S	S		S
662	7/31/2020	July	2020	General surgery	surgery	negative	peritoneal_liquid	Escherichia coli	S		S	S	S		S	S	S		S	S		S	S		S
679	7/6/2020	July	2020	General surgery	surgery	negative	bile	Enterobacter cloacae	S		S	R	R		S	S	S		R	I		S	S		S
680	7/6/2020	July	2020	General surgery	surgery	negative	bile	Citrobacter freundii	S		S	R	R		S	S	S		I	S		S	S		S
681	7/6/2020	July	2020	General surgery	surgery	negative	drainage_liquid	Morganella morganii	S		S	S	S		R	S	S			S		S	S	R	S
682	7/6/2020	July	2020	General surgery	surgery	negative	drainage_liquid	Escherichia coli	S		S	S	S		S	S	S		S	S		S	S	R	S
730	8/12/2020	August	2020	General surgery	surgery	negative	blood	Staphylococcus epidermidis													R	S	R		R
777	8/18/2020	August	2020	General surgery	surgery	negative	catheter_urine	Escherichia coli	S		S	S	S		S	S	S		R	S		S	S		S
785	8/19/2020	August	2020	General surgery	surgery	negative	bile	Escherichia coli	S		S	S	S		S	R	S		R	S		R	S		R
841	8/26/2020	August	2020	General surgery	surgery	negative	bile	Klebsiella pneumoniae spp pneumoniae	S		S	S	S		S	S	S		S	S		S	S		S
847	8/27/2020	August	2020	General surgery	surgery	negative	peritoneal_liquid	Enterococcus faecalis							S							R
848	8/27/2020	August	2020	General surgery	surgery	negative	peritoneal_liquid	Escherichia coli	S		S	S	S		S	R	S		S	S		S	S		R
894	8/6/2020	August	2020	General surgery	surgery	negative	bile	Escherichia coli	S		I	S	R		S	S	S		R	R		S	S		S
928	9/10/2020	September	2020	General surgery	surgery	negative	bile	Stenotrophomonas maltophila														S
986	9/19/2020	September	2020	General surgery	surgery	negative	blood	Staphylococcus hominis													S	S	S		S
995	9/2/2020	September	2020	General surgery	surgery	negative	catheter_urine	Klebsiella oxytoca	S		S	S	S		S	S	S		R	S		S	S		S
1016	9/22/2020	September	2020	General surgery	surgery	negative	drainage_liquid	Enterobacter cloacae	S		S	S	S		S	S	S		S	S		S	S		S
1017	9/22/2020	September	2020	General surgery	surgery	negative	blood	Staphylococcus epidermidis													R	I	R		R
1025	9/23/2020	September	2020	General surgery	surgery	negative	bile	Escherichia coli	S		I	R	S		S	S	S		R	S		S	S		S
1026	9/23/2020	September	2020	General surgery	surgery	negative	bile	Pseudomonas aeruginosa	S		S		S		S	S	S		S	S			S		S
1027	9/23/2020	September	2020	General surgery	surgery	negative	drainage_liquid	Escherichia coli	S		S	S	S		S	S	S		R	S		S	S		S
1028	9/23/2020	September	2020	General surgery	surgery	negative	drainage_liquid	Enterobacter cloacae	S		S	S	S		S	S	S		S	S		S	S		S
1049	9/25/2020	September	2020	General surgery	surgery	negative	drainage_liquid	Escherichia coli	S		I	R	R		S	S	S		R	R		S	S		S
1053	9/26/2020	September	2020	General surgery	surgery	negative	catheter_urine	Enterococcus faecalis							S							R			R
1054	9/26/2020	September	2020	General surgery	surgery	negative	catheter_urine	Serratia marcescens	I		S	S	S		S	S	S		S	S		S	S	R	S
1058	9/27/2020	September	2020	General surgery	surgery	negative	peritoneal_liquid	Escherichia coli	S		S	S	S		S	S	S		S	S		S	S		S
1071	9/29/2020	September	2020	General surgery	surgery	negative	drainage_liquid	Escherichia coli	S		S	S	S		S	S	S		S	S		S	S		S
1186	10/13/2020	October	2020	General surgery	surgery	negative	bronchoaspirate	Citrobacter freundii	S	S	S	S	S		S	S	S			S		S	S		S
1314	10/6/2020	October	2020	General surgery	surgery	negative	blood	Staphylococcus epidermidis								R					S	R	R		R
1335	10/9/2020	October	2020	General surgery	surgery	negative	peritoneal_liquid	Klebsiella pneumoniae	S	S	S	S	S		S	S	S			I		S	S		S
1336	10/9/2020	October	2020	General surgery	surgery	negative	peritoneal_liquid	Citrobacter youngae	S	S	S	S	S		S	S	S			S		S	S		S
1437	11/23/2020	November	2020	General surgery	surgery	negative	cavitary_liquid	Staphylococcus aureus								R					S	S	R		R
1438	11/23/2020	November	2020	General surgery	surgery	negative	urine	Enterococcus faecium								R					R	R	R		R
1457	11/25/2020	November	2020	General surgery	surgery	negative	peritoneal_liquid	Pseudomonas aeruginosa	I		S	R	S		S	S	S			S			R		S
1500	11/30/2020	November	2020	General surgery	surgery	negative	peritoneal_liquid	Staphylococcus cohnii spp. cohnii								R					R	R	R		R
1535	11/7/2020	November	2020	General surgery	surgery	negative	peritoneal_liquid	Enterobacter aerogenes	S	S	S	S	S		S	S	S			S		S	S		S
1536	11/7/2020	November	2020	General surgery	surgery	negative	peritoneal_liquid	Proteus vulgaris	S	S	S	S	S		S	S	S			S		S	S		S
1556	11/9/2020	November	2020	General surgery	surgery	negative	ascites	Staphylococcus capitis								S					S		S		S
1557	11/9/2020	November	2020	General surgery	surgery	negative	ascites	Pseudomonas aeruginosa	S	I	S	R	S		S	S	S			S			S		S
1597	12/14/2020	December	2020	General surgery	surgery	negative	peritoneal_liquid	Escherichia coli	S	S	S	S	S		S	R	S			S		S	S		R
1622	12/17/2020	December	2020	General surgery	surgery	positive	surgical_wound	Staphylococcus epidermidis								S					S	S	S		S
1655	12/21/2020	December	2020	General surgery	surgery	negative	urine	Enterococcus faecalis								R					R	R	R		R
1662	12/22/2020	December	2020	General surgery	surgery	negative	drainage_liquid	Enterococcus faecium													R	R	R
1686	12/24/2020	December	2020	General surgery	surgery	negative	peritoneal_liquid	Citrobacter freundii	S	S	S	S	S		S	S	S			S		S	S		S
1734	12/30/2020	December	2020	General surgery	surgery	negative	catheter	Staphylococcus haemolyticus								R					S	R	R		R
1755	12/5/2020	December	2020	General surgery	surgery	negative	drainage_liquid	Staphylococcus haemolyticus								R					R	R	R		R
1756	12/5/2020	December	2020	General surgery	surgery	positive	peritoneal_liquid	Escherichia coli	S	S	S	S	S		S	S	S			S		S	S		S
1757	12/5/2020	December	2020	General surgery	surgery	negative	blood	Staphylococcus epidermidis								R					S	S	S		R
1850	1/16/2021	January	2021	General surgery	surgery	negative	drainage_liquid	Pseudomonas aeruginosa	S		S	R	S		S	S	S			S			S		S
1851	1/16/2021	January	2021	General surgery	surgery	negative	drainage_liquid	Escherichia coli	S	S	S	S	S		S	S	S			S		R	S		S
1865	1/18/2021	January	2021	General surgery	surgery	negative	peritoneal_liquid	Escherichia coli	S	S	S	S	S		S	S	S			S		S	S		S
1873	1/19/2021	January	2021	General surgery	surgery	negative	cavitary_liquid	Enterobacter aerogenes	S	S	S	S	S		S	S	S			S		S	S		S
1910	1/24/2021	January	2021	General surgery	surgery	positive	peritoneal_liquid	Enterococcus faecalis													R	R	R
7	3/26/2020	March	2020	Orthopedics	surgery	negative	pus	Staphylococcus aureus													S	S	S		S
145	4/28/2020	April	2020	Orthopedics	surgery	negative	ascites	Staphylococcus auricularis													S	S	S		S
148	4/29/2020	April	2020	Orthopedics	surgery	negative	catheter_urine	Proteus mirabilis	I		S	S	S			S	S		S	S		S	R	R	S
228	5/13/2020	May	2020	Orthopedics	surgery	negative	ascites	Staphylococcus aureus													S	S	S		R
258	5/21/2020	May	2020	Orthopedics	surgery	negative	urine	Escherichia coli			S	S	S		S		S			S		S	S		S
284	5/25/2020	May	2020	Orthopedics	surgery	negative	blood	Staphylococcus epidermidis													I	R	R		R
285	5/25/2020	May	2020	Orthopedics	surgery	negative	urine	Proteus mirabilis			S	S	S				S			S		S	S		S
322	5/4/2020	May	2020	Orthopedics	surgery	negative	catheter_urine	Citrobacter farmeri	S		S	S	S		S	S	S		R	S		R	S		S
323	5/4/2020	May	2020	Orthopedics	surgery	negative	catheter_urine	Escherichia coli	S		S	S	S		S	S	I		R	S		R	S		S
332	5/6/2020	May	2020	Orthopedics	surgery	negative	articular_liquid	Staphylococcus capitis													S	S	R		S
346	5/8/2020	May	2020	Orthopedics	surgery	negative	pus	Staphylococcus epidermidis													R	S	R		R
347	5/8/2020	May	2020	Orthopedics	surgery	negative	pus	Enterobacter cloacae	S		S	S	S		S	S	S		S	S		S	S		S
357	5/9/2020	May	2020	Orthopedics	surgery	negative	catheter_urine	Escherichia coli	S		S	S	S		S	S	S		S	S		S	S		S
361	6/1/2020	June	2020	Orthopedics	surgery	negative	catheter_urine	Morganella morganii	S		S	S	S		R	R	S			S		R	R	R	R
362	6/1/2020	June	2020	Orthopedics	surgery	negative	catheter_urine	Enterococcus faecalis							S							R			S
451	6/3/2020	June	2020	Orthopedics	surgery	negative	surgical_wound	Staphylococcus aureus													S	S	R		S
517	7/15/2020	July	2020	Orthopedics	surgery	negative	surgical_wound	Serratia marcescens	S		S	S	S		S	S	S		S	S		S	S	R	S
595	7/23/2020	July	2020	Orthopedics	surgery	positive	Others	Staphylococcus capitis													S	S	S		S
617	7/27/2020	July	2020	Orthopedics	surgery	negative	biopsy	Staphylococcus haemolyticus													S	S	S		S
629	7/28/2020	July	2020	Orthopedics	surgery	negative	articular_liquid	Morganella morganii	S		S	R	R		R	S	S			S		S	S	R	S
630	7/28/2020	July	2020	Orthopedics	surgery	negative	biopsy	Staphylococcus epidermidis													I	R	R		R
666	7/4/2020	July	2020	Orthopedics	surgery	negative	urine	Escherichia coli			S	S	S		S		S			S		R	S		R
697	7/9/2020	July	2020	Orthopedics	surgery	negative	Others	Staphylococcus hominis													I	S	S		S
771	8/17/2020	August	2020	Orthopedics	surgery	negative	urine	Enterococcus faecalis							S							R			S
806	8/21/2020	August	2020	Orthopedics	surgery	negative	catheter_urine	Escherichia coli	S		S	S	S		S	S	S		S	S		S	S		S
814	8/22/2020	August	2020	Orthopedics	surgery	negative	cutaneous_lesion	Staphylococcus aureus													S	S	R		S
822	8/23/2020	August	2020	Orthopedics	surgery	negative	blood	Staphylococcus epidermidis													R	I	R		R
906	8/8/2020	August	2020	Orthopedics	surgery	negative	catheter_urine	Escherichia coli	S		S	S	S		S	S	S		S	S		S	S		S
912	8/9/2020	August	2020	Orthopedics	surgery	negative	urine	Proteus mirabilis			S	S	S				S			S		R	R		S
960	9/16/2020	September	2020	Orthopedics	surgery	negative	surgical_wound	Staphylococcus intermedius													R	R	R		R
1050	9/25/2020	September	2020	Orthopedics	surgery	negative	urine	Enterobacter aerogenes			S	S	S		S		S			S		S	S		S
1123	9/7/2020	September	2020	Orthopedics	surgery	negative	surgical_wound	Staphylococcus epidermidis													R	S	R		R
1124	9/7/2020	September	2020	Orthopedics	surgery	negative	prostatic_material	Staphylococcus aureus													S	S	S		S
1154	10/1/2020	October	2020	Orthopedics	surgery	negative	urine	Pseudomonas aeruginosa	S	I	S	R	S		S	S	S		S	S	R	R	S	S	S	R
1187	10/13/2020	October	2020	Orthopedics	surgery	negative	articular_liquid	Staphylococcus aureus								R					S	S	S		R
1345	11/11/2020	November	2020	Orthopedics	surgery	positive	articular_liquid	Staphylococcus hominis spp. hominis								R					R	S	R		R
1501	11/30/2020	November	2020	Orthopedics	surgery	negative	surgical_wound	Staphylococcus aureus								S					I	S	S		S
1521	11/5/2020	November	2020	Orthopedics	surgery	negative	articular_liquid	Staphylococcus sciuri								S					I	S	S		S
1522	11/5/2020	November	2020	Orthopedics	surgery	negative	articular_liquid	Staphylococcus epidermidis								S					I	S	S		S
1623	12/17/2020	December	2020	Orthopedics	surgery	negative	ascites	Staphylococcus epidermidis								S					S	S	S		S
1624	12/17/2020	December	2020	Orthopedics	surgery	negative	ascites	Staphylococcus cohnii spp. Urealyticum								S					S	S	S		S
1625	12/17/2020	December	2020	Orthopedics	surgery	negative	ascites	Staphylococcus aureus								R						S	R		R
1891	1/21/2021	January	2021	Orthopedics	surgery	negative	catheter_urine	Escherichia coli	S	S	S	S	S		S	S	S		S	S		S	S	S	S
1892	1/21/2021	January	2021	Orthopedics	surgery	negative	catheter_urine	Proteus mirabilis	S	S	S	S	S		S	S	S		S	S		S	S	R	S
1893	1/21/2021	January	2021	Orthopedics	surgery	negative	catheter_urine	Escherichia coli	S	S	S	S	S		S	S	S		S	S		S	S	S	S
1932	1/26/2021	January	2021	Orthopedics	surgery	negative	blood	Enterobacter aerogenes	S	R	I	R	R		S	S	S			R		S	S		S
698	7/9/2020	July	2020	otolaryngology	surgery	negative	nasal_tampon	Staphylococcus epidermidis													S	S	S		S
699	7/9/2020	July	2020	otolaryngology	surgery	negative	nasal_tampon	Citrobacter koseri	S		S	S	S		S	S	S		S	S		S	S		S
1231	10/19/2020	October	2020	otolaryngology	surgery	negative	urine	Enterobacter aerogenes	S	R	R	R	I		S	S	S		R	S	R	S	S	S	S
140	4/27/2020	April	2020	Thoracic Surgery	surgery	negative	ascites	Streptococcus pneumoniae			S	I				S					S	S				S
141	4/27/2020	April	2020	Thoracic Surgery	surgery	negative	ascites	Staphylococcus epidermidis													S	S	S		S
251	5/2/2020	May	2020	Thoracic Surgery	surgery	negative	sputum	Hafnia alvei	S		S	S	S		S	S	S		S	S		S	S	R	S
513	7/14/2020	July	2020	Thoracic Surgery	surgery	negative	biopsy_from_lymph_node	Staphylococcus epidermidis													I	S	R		S
526	7/16/2020	July	2020	Thoracic Surgery	surgery	negative	pus	Staphylococcus hominis													S	S	R		S
574	7/21/2020	July	2020	Thoracic Surgery	surgery	negative	bronchus_lavage	Klebsiella oxytoca	S		S	S	S		S	S	S		S	S		S	S		S
575	7/21/2020	July	2020	Thoracic Surgery	surgery	negative	bronchus_lavage	Serratia liquefaciens	S		S	S	S		S	S	S		S	S		S	S	R	S
576	7/21/2020	July	2020	Thoracic Surgery	surgery	negative	bronchus_lavage	Staphylococcus haemolyticus													R	R	R		R
683	7/6/2020	July	2020	Thoracic Surgery	surgery	negative	bronchoaspirate	Stenotrophomonas maltophila														S
684	7/6/2020	July	2020	Thoracic Surgery	surgery	negative	bronchoaspirate	Klebsiella oxytoca	S		S	S	S		S	S	S		S	S		S	S		S
685	7/6/2020	July	2020	Thoracic Surgery	surgery	negative	bronchoaspirate	Pseudomonas aeruginosa	S		S		S		S	S	S		S	S			S		S
686	7/6/2020	July	2020	Thoracic Surgery	surgery	negative	bronchoaspirate	Staphylococcus aureus													S	S	S		R
696	7/9/2020	July	2020	Thoracic Surgery	surgery	negative	pleura_liquid	Staphylococcus cohnii spp. cohnii													S	S	S		S
739	8/13/2020	August	2020	Thoracic Surgery	surgery	negative	pleura_liquid	Streptococcus constallatus			S	S					S
821	8/23/2020	August	2020	Thoracic Surgery	surgery	negative	venous_catheter	Staphylococcus epidermidis													I	S	R		R
827	8/24/2020	August	2020	Thoracic Surgery	surgery	negative	sputum	Hafnia alvei	S		S	S	S		S	S	S		S	S		S	S	R	S
828	8/24/2020	August	2020	Thoracic Surgery	surgery	negative	sputum	Escherichia coli	S		S	S	S		S	S	S		S	S		S	S	R	S
1315	10/6/2020	October	2020	Thoracic Surgery	surgery	negative	bronchoaspirate	Enterobacter cloacae	I	I	I	R	S		I	S	S			S		R	S		S
1332	10/8/2020	October	2020	Thoracic Surgery	surgery	negative	pleura_liquid	Staphylococcus epidermidis								S					S	S	S		S
1467	11/26/2020	November	2020	Thoracic Surgery	surgery	negative	bronchus_lavage	Pseudomonas aeruginosa	S	I	S	R	S		S	S	S			S			S		S
1644	12/2/2020	December	2020	Thoracic Surgery	surgery	negative	catheter_urine	Enterococcus faecalis								S					R	R	R		I
1899	1/22/2021	January	2021	Thoracic Surgery	surgery	negative	pleura_liquid	Staphylococcus hominis spp. hominis								S					S	S	S		S
1997	1/8/2021	January	2021	Thoracic Surgery	surgery	positive	bronchus_lavage	Escherichia coli	S	S	S	S	S		S	S	S			S		S	S		S
40	4/10/2020	April	2020	Urology	surgery	negative	blood	Enterococcus faecium							S							R
58	4/13/2020	April	2020	Urology	surgery	negative	rectal_tampon	Klebsiella pneumoniae spp pneumoniae	S		R	R	R		R	R	R		R	R		S	S		I
142	4/27/2020	April	2020	Urology	surgery	positive	venous_catheter	Klebsiella pneumoniae spp pneumoniae	R		R	R	R		R	R	R		R	R		R	S	R	R
150	4/3/2020	April	2020	Urology	surgery	negative	blood	Enterococcus faecalis							S							R
173	4/5/2020	April	2020	Urology	surgery	negative	ureter	Proteus mirabilis	S		S	S	S			R	S		S	S		R	R	R	R
206	5/1/2020	May	2020	Urology	surgery	negative	ureter	Escherichia coli	S		S	S	S		S	S	S		S	S		S	S		S
207	5/1/2020	May	2020	Urology	surgery	negative	ureter	Enterococcus faecalis							S							R			S
259	5/21/2020	May	2020	Urology	surgery	negative	venous_catheter	Klebsiella pneumoniae spp pneumoniae	S		R	R	R	R	R	R	R		R	R		S	S		R
260	5/21/2020	May	2020	Urology	surgery	negative	venous_catheter	Escherichia coli	S		R	R	R		S	R	S		R	R		R	S		R
363	6/1/2020	June	2020	Urology	surgery	negative	surgical_wound	Enterococcus faecalis							S							R
386	6/16/2020	June	2020	Urology	surgery	negative	drainage_liquid	Klebsiella pneumoniae spp pneumoniae	S		S	S	S		S	S	S		S	S		S	S		S
387	6/16/2020	June	2020	Urology	surgery	negative	drainage_liquid	Staphylococcus epidermidis													S	R	R		R
388	6/16/2020	June	2020	Urology	surgery	negative	drainage_liquid	Escherichia coli	S		S	S	S		S	S	S		R	S		S	S		S
458	6/30/2020	June	2020	Urology	surgery	negative	catheter_urine	Enterococcus faecalis							S							R			S
485	6/9/2020	June	2020	Urology	surgery	negative	ascites	Escherichia coli	S		R	R	I		S	R	S		R	S		R	S		R
507	7/13/2020	July	2020	Urology	surgery	negative	catheter_urine	Morganella morganii	S		S	S	S		I	S	S			S		S	S	R	S
631	7/28/2020	July	2020	Urology	surgery	negative	catheter_urine	Enterococcus faecalis							S							R			S
632	7/28/2020	July	2020	Urology	surgery	negative	catheter_urine	Escherichia coli	S		R	R	R		S	R	S		R	S		R	S		R
639	7/29/2020	July	2020	Urology	surgery	negative	catheter_urine	Enterococcus faecium							R							R			R
688	7/7/2020	July	2020	Urology	surgery	negative	ureter	Escherichia coli	S		S	S	S		S	S	S		R	S		R	S		I
751	8/14/2020	August	2020	Urology	surgery	negative	blood	Veillonella							S				R	S						S
752	8/14/2020	August	2020	Urology	surgery	negative	ureter	Escherichia coli	S		R	R	R		S	S	S		R	R		R	S		S
890	8/5/2020	August	2020	Urology	surgery	negative	venous_catheter	Enterococcus faecalis							S							R
921	9/1/2020	September	2020	Urology	surgery	negative	ureter	Enterococcus faecalis							S							R			R
1072	9/29/2020	September	2020	Urology	surgery	negative	urine	Escherichia coli	S	S	S	S	S		S	S	S		S	S	R	S	S	S	S
1085	9/30/2020	September	2020	Urology	surgery	negative	urine	Enterococcus faecalis								R					R	R	R
1155	10/1/2020	October	2020	Urology	surgery	negative	ureter	Escherichia coli	S	S	S	S	S		S	S	S		R	S	R	S	S	S	S	S
1269	10/24/2020	October	2020	Urology	surgery	negative	venous_catheter	Staphylococcus epidermidis								R					S	R	R		R
1280	10/27/2020	October	2020	Urology	surgery	negative	urine	Enterococcus faecalis								R					R	R	R
1471	11/27/2020	November	2020	Urology	surgery	negative	ascites	Enterococcus faecalis													R	R	R
1843	1/15/2021	January	2021	Urology	surgery	negative	ureter	Escherichia coli	S	R	R	R	R		S	R	S		R	S		R	R	S	R
[truncated: 3 more rows]
