# Supplementary material for: Profile of Bacterial Infections in COVID-19 Patients: Antimicrobial Resistance in the Time of SARS-CoV-2
Source: Biology (Basel). 2021 Aug 24;10(9):822. doi: 10.3390/biology10090822 (PMC8467430; doi:10.3390/biology10090822)
Supplement: Supplementary file 1 [file biology-10-00822-s001.zip › Supplementary_tableS2.xlsx]

## Sheet: README
Supplementary table 2
Details on the lists of antibiotics tested on the isolated species.
Column ID	description
Phylum	taxonomy of the corresponding species
Class
Order
Family
Genus
Species
n_isol	number of isolates belonging to the indicated species
An	Amikacin	an "X" indicates that the antibiotic has been tested against the species
Azt	Aztreonam
Fep	Cefepime
Ctx	Cefotaxime
Caz	Ceftazidime
Cro	Ceftriaxone
Ipm	Imipenem
Lvx	Levofloxacin
Mem	Meropenem
Nor	Norfloxacin
Pip	Piperacillin
Pta	Piperacillin-tazobactam
Te	Tetracycline
Sxt	Trimethoprim/sulfamethoxazole
Gm	Gentamicin
Cl	Colistin
Cip	Ciprofloxacin
c	Cloramphenicol

## Sheet: antibiotics_per_species
							Amikacin	Aztreonam	Cefepime	Cefotaxime	Ceftazidime	Ceftriaxone	Imipenem	Levofloxacin	Meropenem	Norfloxacin	Piperacillin	Piperacillin-tazobactam	Tetracycline	Trimethoprim/sulfamethoxazole	Gentamicin	Colistin	Ciprofloxacin	Cloramphenicol
Phylum	Class	Order	Family	Genus	Species	n_isol	An	Azt	Fep	Ctx	Caz	Cro	Ipm	Lvx	Mem	Nor	Pip	Pta	Te	Sxt	Gm	Cl	Cip	c
Actinobacteria	Actinobacteria	Corynebacteriales	Corynebacteriaceae	Corynebacterium	Corynebacterium amycolatum	4													x				x
					Corynebacterium jeikeium	1													x		x		x
					Corynebacterium matruchotii	3													x		x		x
					Corynebacterium renale	1													x
					Corynebacterium spp.	3													x		x		x
					Corynebacterium urealyticum	1													x
		Mycobacteriales	Mycobacteriaceae	Mycobacterium	Mycobacterium tuberculosis complex	2
Bacteroidetes	Flavobacteriia	Flavobacteriales	Weeksellaceae	Chryseobacterium	Chryseobacterium meningosepticum	1	x		x		x		x	x	x		x	x			x	x	x
Firmicutes	Bacilli	Bacillales	Sporolactobacillaceae	Gemella	Gemella morbillorum	1													x		x		x
			Staphylococcaceae	Staphylococcus	Staphylococcus aureus	134							x	x					x	x	x		x
					Staphylococcus auricularis	6								x					x	x	x		x
					Staphylococcus capitis	28								x					x	x	x		x
					Staphylococcus capitis spp. uerolyticus	1								x						x	x		x
					Staphylococcus coag negative	5													x	x	x		x
					Staphylococcus cohnii spp. cohnii	4								x					x	x	x		x
					Staphylococcus cohnii spp. urealyticum	2								x					x	x	x		x
					Staphylococcus epidermidis	175	x							x					x	x	x		x
					Staphylococcus haemolyticus	59								x					x	x	x		x
					Staphylococcus hominis	36								x					x	x	x		x
					Staphylococcus hominis spp. hominis	24								x					x	x	x		x
					Staphylococcus intermedius	7								x					x	x	x		x
					Staphylococcus kloosii	1													x	x	x		x
					Staphylococcus lugdunensis	7								x					x	x	x		x
					Staphylococcus sciuri	3								x					x	x	x		x
					Staphylococcus simulans	3								x					x	x	x		x
					Staphylococcus warneri	2								x					x	x	x		x
					Staphylococcus xylosus	2								x					x	x	x		x
					Staphylococus schleiferi	2													x	x	x		x
					Staphylococus schleiferi spp. schleiferi	1								x					x	x	x		x
		Lactobacillales	Enterococcaceae	Enterococcus	Enterococcus avium	1													x
					Enterococcus casseliflavus/gallinarum	1							x							x
					Enterococcus faecalis	184	x		x	x			x	x					x	x	x		x
					Enterococcus faecium	52							x	x					x	x	x		x
					Enterococcus gallinarum	1													x	x	x
					Enterococcus hirae	1							x							x
					Enterococcus raffinosus	1							x							x
					Enterococcus spp.	5	x						x	x					x	x			x
			Streptococcaceae	Streptococcus	Streptococcus agalactiae (gr B)	3							x	x					x		x		x	x
					Streptococcus bovis I	1								x					x
					Streptococcus bovis II	2			x	x					x
					Streptococcus constallatus	1			x	x					x
					Streptococcus cristatus	1			x	x					x
					Streptococcus dysgalactiae spp. equisimilis	3								x					x					x
					Streptococcus gordonii	1			x	x					x
					Streptococcus intermedius	1			x	x					x
					Streptococcus mitis	2			x	x		x		x	x				x					x
					Streptococcus mitis group	1			x	x		x
					Streptococcus oralis	2			x	x					x
					Streptococcus pneumoniae	1			x	x				x					x	x				x
					Streptococcus pyogenes (gr A)	2			x	x		x		x	x				x	x				x
					Streptocuccus anginosus	5			x	x					x				x	x	x
	Negaivicutes	Veillonellales	Veillonellaceae	Veillonella	Veillonella	1							x				x	x						x
Proteobacteria	Alphaproteobacteria	Sphingomonadales	Sphingomonadaceae	Sphingomonas	Sphingomonas paucimobilis	1	x	x	x		x		x	x	x		x	x
	Betaproteobacteria	Burkholderiales	Alcaligenaceae	Achromobacter	Achromobacter spp.	7	x	x	x	x	x		x	x	x		x	x			x	x	x
			Burkholderiaceae	Burkolderia	Burkolderia cepacia	1	x								x						x		x
		Neisseriales	Neisseriaceae	Neisseria	Neisseria meningitidis	1				x					x
	Gammaproteobacteria	Aeromonadales	Aeromonadaceae	Aeromonas	Aeromonas caviae	1			x		x			x						x			x
		Enterobacterales	Enterobacteriaceae	Cedecea	Cedecea davisae	1	x	x	x	x	x		x	x	x		x	x		x	x	x	x
				Citrobacter	Citrobacter braakii	1	x		x	x	x		x	x	x		x	x		x	x		x
					Citrobacter farmeri	6	x	x	x	x	x		x	x	x		x	x	x	x	x	x	x
					Citrobacter freundii	12	x	x	x	x	x		x	x	x		x	x	x	x	x	x	x
					Citrobacter koseri	18	x	x	x	x	x		x	x	x	x	x	x	x	x	x	x	x
					Citrobacter youngae	2	x	x	x	x	x		x	x	x		x	x		x	x		x
				Clostridium	Clostridium novyi A	1							x					x						x
				Enterobacter	Enterobacter aerogenes	33	x	x	x	x	x	x	x	x	x	x	x	x	x	x	x	x	x
					Enterobacter amnigenus biogroup 2	1	x	x	x	x	x		x	x	x		x	x	x	x	x	x	x
					Enterobacter asburiae	2	x		x	x	x		x	x	x		x	x		x	x		x
					Enterobacter cloacae	46	x	x	x	x	x		x	x	x	x	x	x	x	x	x		x
					Enterobacter spp.	1	x	x	x	x	x		x	x	x			x		x	x		x
				Escherichia	Escherichia coli	420	x	x	x	x	x	x	x	x	x	x	x	x	x	x	x	x	x	x
				Klebsiella	Klebsiella oxytoca	37	x	x	x	x	x		x	x	x	x	x	x	x	x	x	x	x
					Klebsiella ozaenae	1	x		x	x	x		x	x		x		x		x	x	x	x
					Klebsiella pneumoniae	192	x	x	x	x	x	x	x	x	x	x	x	x	x	x	x	x	x	x
				Kluyvera	Kluyvera ascorbata	1	x		x	x	x		x	x	x		x	x		x	x		x
				Salmonella	Salmonella spp.	3	x	x	x	x	x		x	x	x		x	x		x	x
			Erwinaceae	Pantoea	Pantoea agglomerans	2	x	x	x	x	x		x	x	x		x	x		x	x	x	x
			Hafniaceae	Hafnia	Hafnia alvei	4	x	x	x	x	x		x	x	x		x	x		x	x	x	x
			Morganellaceae	Moellerella	Moellerella wisconsensis	1			x	x	x		x		x			x		x	x		x
				Morganella	Morganella morganii	30	x	x	x	x	x		x	x	x	x	x	x	x	x	x	x	x
				Proteus	Proteus mirabilis	86	x	x	x	x	x		x	x	x	x	x	x	x	x	x	x	x
					Proteus penneri	1	x		x	x	x		x	x	x		x	x		x	x	x	x
					Proteus vulgaris	3	x	x	x	x	x		x	x	x		x	x	x	x	x	x	x
					Proteus vulgaris/penneri	1			x	x	x		x		x			x		x	x		x
				Providencia	Providencia rettgeri	3	x	x	x	x	x		x	x	x		x	x		x	x	x	x
					Providencia stuartii	4	x	x	x	x	x		x	x	x		x	x	x	x	x	x	x
			Yersiniaceae	Serratia	Serratia liquefaciens	2	x		x	x	x		x	x	x		x	x		x	x	x	x
					Serratia marcescens	28	x	x	x	x	x		x	x	x	x	x	x		x	x	x	x
					Serratia odorifera 1	1	x		x		x		x	x		x		x		x	x	x	x
					Serratia plymuthica	2	x		x	x	x		x	x	x		x	x		x	x	x	x
		Pasteurellales	Pasteurellaceae	Haemophilus	Haemophilus influenzae	5			x	x		x	x	x	x			x	x	x			x	x
				Pasteurella	Pasteuerlla aerogenes	1				x				x						x			x
		Pseudomonadales	Moraxellaceae	Acinetobacter	Acinetobacter baumanii	22	x	x	x	x	x		x	x	x				x	x	x		x	x
					Acinetobacter baumanii/calcoaceticus complex	2	x						x	x	x					x	x	x	x
					Acinetobacter lwoffii	2	x	x		x	x		x	x	x					x	x
			Pseudomonadaceae	Pseudomonas	Pseudomonas aeruginosa	187	x	x	x	x	x		x	x	x		x	x	x	x	x	x	x	x
					Pseudomonas putida	5	x		x		x		x	x	x		x	x			x		x
					Pseudomonas spp.	1	x		x		x		x	x	x		x	x			x		x
					Pseudomonas stutzeri	1	x		x		x		x	x	x		x	x			x		x
		Xanthomonadales	Xanthomonadaceae	Stenotrophomonas	Stenotrophomonas maltophila	25														x
Tenericutes	Mollicutes	Mycoplasmatales	Mycoplasmataceae	Mycoplasma	Mycoplasma hominis	1								x					x				x
