# Supplementary material for: Profile of Bacterial Infections in COVID-19 Patients: Antimicrobial Resistance in the Time of SARS-CoV-2
Source: Biology (Basel). 2021 Aug 24;10(9):822. doi: 10.3390/biology10090822 (PMC8467430; doi:10.3390/biology10090822)
Supplement: Supplementary file 1 [file biology-10-00822-s001.zip › Supplementary_tableS3.xlsx]

## Sheet: Sheet1
Phylum	Class	Order	Family	Genus	Species	Isolates per species	from COVID+	isolates_per_genus	Noso/comm_per_genus	isolates_per_family	Noso/comm_per_family	isolates_by_Order	Noso/comm_per_order	isolates_by_class	Noso/comm_per_class	isolates_by_phylum	Noso/comm_per_phylum
Actinobacteria	Actinobacteria	Corynebacteriales	Corynebacteriaceae	Corynebacterium	Corynebacterium amycolatum	4	1	13	9	13	9	13	9	14	10	14	10
					Corynebacterium jeikeium	1	1
					Corynebacterium matruchotii	3	3
					Corynebacterium renale	1	1
					Corynebacterium spp.	3	2
					Corynebacterium urealyticum	1	1
		Mycobacteriales	Mycobacteriaceae	Mycobacterium	Mycobacterium tuberculosis complex	1	1	1	1	1	1	1	1
Bacteroidetes	Flavobacteriia	Flavobacteriales	Weeksellaceae	Chryseobacterium	Chryseobacterium meningosepticum	1	1	1	1	1	1	1	1	1	1	1	1
Firmicutes	Bacilli	Bacillales	Sporolactobacillaceae	Gemella	Gemella morbillorum	1	1	1	1	1	1	476	156	748	261	748	262
			Staphylococcaceae	Staphylococcus	Staphylococcus aureus	134	33	475	155	475	155
					Staphylococcus auricularis	6	3
					Staphylococcus capitis	1	1
					Staphylococcus capitis spp. uerolyticus	1	0
					Staphylococcus coag negative	5	5
					Staphylococcus cohnii spp. cohnii	4	1
					Staphylococcus cohnii spp. urealyticum	2	2
					Staphylococcus epidermidis	175	59
					Staphylococcus haemolyticus	59	18
					Staphylococcus hominis	36	9
					Staphylococcus hominis spp. hominis	24	13
					Staphylococcus intermedius	7	1
					Staphylococcus kloosii	1	1
					Staphylococcus lugdunensis	7	1
					Staphylococcus sciuri	3	1
					Staphylococcus simulans	3	1
					Staphylococcus warneri	2	1
					Staphylococcus xylosus	2	2
					Staphylococus schleiferi	2	2
					Staphylococus schleiferi spp. schleiferi	1	1
		Lactobacillales	Enterococcaceae	Enterococcus	Enterococcus avium	1	1	246	84	246	84	272	105
					Enterococcus casseliflavus/gallinarum	1	1
					Enterococcus faecalis	184	63
					Enterococcus faecium	52	15
					Enterococcus gallinarum	1	1
					Enterococcus hirae	1	1
					Enterococcus raffinosus	1	1
					Enterococcus spp.	5	1
			Streptococcaceae	Streptococcus	Streptococcus agalactiae (gr B)	3	3	26	21	26	21
					Streptococcus bovis I	1	1
					Streptococcus bovis II	2	2
					Streptococcus constallatus	1	1
					Streptococcus cristatus	1	1
					Streptococcus dysgalactiae spp. equisimilis	3	3
					Streptococcus gordonii	1	1
					Streptococcus intermedius	1	1
					Streptococcus mitis	2	1
					Streptococcus mitis group	1	1
					Streptococcus oralis	2	2
					Streptococcus pneumoniae	1	1
					Streptococcus pyogenes (gr A)	2	2
					Streptocuccus anginosus	5	1
	Negaivicutes	Veillonellales	Veillonellaceae	Veillonella	Veillonella	1	1	1	1	1	1	1	1	1	1
Proteobacteria	Alphaproteobacteria	Sphingomonadales	Sphingomonadaceae	Sphingomonas	Sphingomonas paucimobilis	1	1	1	1	1	1	1	1	1	1	1209	378
	Betaproteobacteria	Burkholderiales	Alcaligenaceae	Achromobacter	Achromobacter spp.	7	7	7	7	7	7	8	8	9	9
			Burkholderiaceae	Burkolderia	Burkolderia cepacia	1	1	1	1	1	1
		Neisseriales	Neisseriaceae	Neisseria	Neisseria meningitidis	1	1	1	1	1	1	1	1
	Gammaproteobacteria	Aeromonadales	Aeromonadaceae	Aeromonas	Aeromonas caviae	1	1	1	1	1	1	1	1	1198	368
		Enterobacterales	Enterobacteriaceae	Cedecea	Cedecea davisae	1	1	1	1	778	216	946	266
				Citrobacter	Citrobacter braakii	1	1	39	12
					Citrobacter farmeri	6	2
					Citrobacter freundii	12	1
					Citrobacter koseri	18	6
					Citrobacter youngae	2	2
				Clostridium	Clostridium novyi A	1	1	1	1
				Enterobacter	Enterobacter aerogenes	33	10	83	27
					Enterobacter amnigenus biogroup 2	1	1
					Enterobacter asburiae	2	2
					Enterobacter cloacae	46	13
					Enterobacter spp.	1	1
				Escherichia	Escherichia coli	420	81	650	173
				Klebsiella	Klebsiella oxytoca	37	16
					Klebsiella ozaenae	1	1
					Klebsiella pneumoniae	192	75
				Kluyvera	Kluyvera ascorbata	1	1	1	1
				Salmonella	Salmonella spp.	3	1	3	1
			Erwinaceae	Pantoea	Pantoea agglomerans	2	1	2	1	2	1
			Hafniaceae	Hafnia	Hafnia alvei	4	4	4	4	4	4
			Morganellaceae	Moellerella	Moellerella wisconsensis	1	1	1	1	129	31
				Morganella	Morganella morganii	30	7	30	7
				Proteus	Proteus mirabilis	86	17	91	20
					Proteus penneri	1	1
					Proteus vulgaris	3	1
					Proteus vulgaris/penneri	1	1
				Providencia	Providencia rettgeri	3	1	7	3
					Providencia stuartii	4	2
			Yersiniaceae	Serratia	Serratia liquefaciens	2	2	33	14	33	14
					Serratia marcescens	28	10
					Serratia odorifera 1	1	1
					Serratia plymuthica	2	1
		Pasteurellales	Pasteurellaceae	Haemophilus	Haemophilus influenzae	5	3	5	3	6	4	6	4
				Pasteurella	Pasteuerlla aerogenes	1	1	1	1
		Pseudomonadales	Moraxellaceae	Acinetobacter	Acinetobacter baumanii	22	15	26	17	26	17	220	83
					Acinetobacter baumanii/calcoaceticus complex	2	1
					Acinetobacter lwoffii	2	1
			Pseudomonadaceae	Pseudomonas	Pseudomonas aeruginosa	187	62	194	66	194	66
					Pseudomonas putida	5	2
					Pseudomonas spp.	1	1
					Pseudomonas stutzeri	1	1
		Xanthomonadales	Xanthomonadaceae	Stenotrophomonas	Stenotrophomonas maltophila	25	8	25	8	25	8	25	8
Tenericutes	Mollicutes	Mycoplasmatales	Mycoplasmataceae	Mycoplasma	Mycoplasma hominis	1	1	1	1	1	1	1	1	1	1	1	1
