# Supplementary material for: Profile of Bacterial Infections in COVID-19 Patients: Antimicrobial Resistance in the Time of SARS-CoV-2
Source: Biology (Basel). 2021 Aug 24;10(9):822. doi: 10.3390/biology10090822 (PMC8467430; doi:10.3390/biology10090822)
Supplement: Supplementary file 1 [file biology-10-00822-s001.zip › Supplementary_tableS4.xlsx]

## Sheet: README
Supplementary Table 4
Wilcoxon-Mann-Whitney p values of the comparison between alpha diversities calculated for isolation sources.
Sheet	description	details
specimen_n_of_species	p values resulting from the comparison among observed alpha diversities	yellow cells highlight p values <0.05
specimen_Shannon	p values resulting from the comparison among Shannon alpha diversities
specimen_Simpson	p values resulting from the comparison among Simpson alpha diversities

## Sheet: specimen_n_of_species
	articular_liquid	ascites	bronchoaspirate	bile	biopsy	biopsy_from_lymph_node	blood	bronchus_lavage	catheter	catheter_urine	cavitary_liquid	cutaneous_lesion	drainage_liquid	exudate	feces	liquor	nasal_tampon	oral_tampon	Others	peritoneal_liquid	pharynx	bedsore	pleura_liquid	prostatic_material	pus	rectal_tampon	sputum	surgical_wound	ureter	urethra_secretion	urine	vaginal_secretion	venous_catheter
articular_liquid	1	0.280316	0.00122649	0.588092	0.576999	0.755189	0.00286696	0.426298	0.945753	0.00975946	0.792147	0.641117	0.205851	0.376759	1	0.792147	0.36131	0.755189	0.544827	0.591087	0.755189	0.641117	0.139854	0.755189	0.549899	0.248846	0.140574	0.897146	1	0.755189	0.060262	0.376759	0.0362425
ascites	0.280316	1	0.000393667	0.711397	1	0.359201	0.00173212	0.572552	0.207158	0.0123079	0.181796	0.109486	0.943708	0.0950234	0.316878	0.181796	0.928602	0.359201	0.75538	0.378398	0.359201	0.109486	0.0133654	0.359201	0.506329	0.00456551	0.68859	0.189055	0.118175	0.359201	0.154062	0.0950234	0.173429
bronchoaspirate	0.00122649	0.000393667	1	0.0032401	0.196498	0.12145	0.110812	4.2003e-06	7.53797e-05	0.0377462	0.00357004	0.00118754	0.000595136	0.00772707	0.0117428	0.00357004	0.0656081	0.12145	0.00492052	2.48488e-05	0.12145	0.00118754	0.000109188	0.12145	3.09458e-05	2.06569e-07	0.00035329	4.00675e-06	2.42474e-06	0.12145	0.00370379	0.00772707	0.000414711
bile	0.588092	0.711397	0.0032401	1	1	0.576999	0.00843982	1	0.513292	0.0265257	0.396875	0.287416	0.706879	0.217044	0.567709	0.396875	0.859993	0.576999	1	0.811443	0.576999	0.287416	0.0527506	0.576999	1	0.0496709	0.425811	0.558389	0.450794	0.576999	0.162606	0.217044	0.145541
biopsy	0.576999	1	0.196498	1	NaN	1	0.312766	0.800542	0.423711	0.437522	0.414216	0.288844	1	0.248213	0.617075	0.414216	NaN	1	1	0.5791	1	0.288844	0.0233422	1	0.691153	0.0448623	1	0.488252	0.347349	1	0.752824	0.248213	0.667327
biopsy_from_lymph_node	0.755189	0.359201	0.12145	0.576999	1	NaN	0.140297	0.393534	0.540291	0.186441	1	1	0.256839	NaN	1	1	0.4795	NaN	0.527089	0.405381	NaN	1	NaN	NaN	0.475442	0.855132	0.275907	0.547733	0.543592	NaN	0.268631	NaN	0.197905
blood	0.00286696	0.00173212	0.110812	0.00843982	0.312766	0.140297	1	1.38826e-05	0.000298992	0.545044	0.00713742	0.00242081	0.00349366	0.0109127	0.0224801	0.00713742	0.149784	0.140297	0.0143396	0.000104784	0.140297	0.00242081	0.000166744	0.140297	8.08142e-05	3.2645e-07	0.0021543	1.15489e-05	6.48452e-06	0.140297	0.0878923	0.0109127	0.0067327
bronchus_lavage	0.426298	0.572552	4.2003e-06	1	0.800542	0.393534	1.38826e-05	1	0.349367	0.000273096	0.257191	0.162649	0.548115	0.123998	0.42144	0.257191	0.684102	0.393534	1	0.688112	0.393534	0.162649	0.0212243	0.393534	0.914881	0.00873125	0.232177	0.352559	0.242893	0.393534	0.0226815	0.123998	0.0199649
catheter	0.945753	0.207158	7.53797e-05	0.513292	0.423711	0.540291	0.000298992	0.349367	1	0.00194871	0.583882	0.422996	0.0968288	0.214542	0.82916	0.583882	0.220671	0.540291	0.456057	0.597225	0.540291	0.422996	0.0572239	0.540291	0.587498	0.0853202	0.0930072	0.974123	0.869179	0.540291	0.0277884	0.214542	0.00932441
catheter_urine	0.00975946	0.0123079	0.0377462	0.0265257	0.437522	0.186441	0.545044	0.000273096	0.00194871	1	0.0183684	0.00744656	0.018976	0.0220422	0.0478796	0.0183684	0.265483	0.186441	0.0418662	0.00118622	0.186441	0.00744656	0.000671168	0.186441	0.0010493	4.68075e-06	0.0190836	0.000148895	0.000104485	0.186441	0.267869	0.0220422	0.0466897
cavitary_liquid	0.792147	0.181796	0.00357004	0.396875	0.414216	1	0.00713742	0.257191	0.583882	0.0183684	1	1	0.0934537	0.563703	1	1	0.187632	1	0.337803	0.337614	1	1	0.256839	1	0.388013	0.593292	0.103649	0.576551	0.651446	1	0.0679081	0.563703	0.0322278
cutaneous_lesion	0.641117	0.109486	0.00118754	0.287416	0.288844	1	0.00242081	0.162649	0.422996	0.00744656	1	1	0.0500715	0.605577	0.843669	1	0.117525	1	0.231998	0.217154	1	1	0.310494	1	0.269263	0.733701	0.0546299	0.428292	0.483927	1	0.0343606	0.605577	0.0137817
drainage_liquid	0.205851	0.943708	0.000595136	0.706879	1	0.256839	0.00349366	0.548115	0.0968288	0.018976	0.0934537	0.0500715	1	0.0457458	0.189526	0.0934537	1	0.256839	0.663674	0.240256	0.256839	0.0500715	0.00432501	0.256839	0.443675	0.00117976	0.775145	0.140548	0.0616802	0.256839	0.235124	0.0457458	0.183236
exudate	0.376759	0.0950234	0.00772707	0.217044	0.248213	NaN	0.0109127	0.123998	0.214542	0.0220422	0.563703	0.605577	0.0457458	NaN	0.504985	0.563703	0.0955807	NaN	0.168493	0.12574	NaN	0.605577	NaN	NaN	0.184836	0.59951	0.0550522	0.246932	0.243216	NaN	0.0534708	NaN	0.0255638
feces	1	0.316878	0.0117428	0.567709	0.617075	1	0.0224801	0.42144	0.82916	0.0478796	1	0.843669	0.189526	0.504985	1	1	0.317311	1	0.513629	0.545923	1	0.843669	0.19043	1	0.575775	0.426326	0.208036	0.794483	0.895058	1	0.140011	0.504985	0.0801162
liquor	0.792147	0.181796	0.00357004	0.396875	0.414216	1	0.00713742	0.257191	0.583882	0.0183684	1	1	0.0934537	0.563703	1	1	0.187632	1	0.337803	0.337614	1	1	0.256839	1	0.388013	0.593292	0.103649	0.576551	0.651446	1	0.0679081	0.563703	0.0322278
nasal_tampon	0.36131	0.928602	0.0656081	0.859993	NaN	0.4795	0.149784	0.684102	0.220671	0.265483	0.187632	0.117525	1	0.0955807	0.317311	0.187632	NaN	0.4795	0.828969	0.389098	0.4795	0.117525	0.00862942	0.4795	0.540823	0.00854404	1	0.308768	0.174098	0.4795	0.639946	0.0955807	0.523421
oral_tampon	0.755189	0.359201	0.12145	0.576999	1	NaN	0.140297	0.393534	0.540291	0.186441	1	1	0.256839	NaN	1	1	0.4795	NaN	0.527089	0.405381	NaN	1	NaN	NaN	0.475442	0.855132	0.275907	0.547733	0.543592	NaN	0.268631	NaN	0.197905
Others	0.544827	0.75538	0.00492052	1	1	0.527089	0.0143396	1	0.456057	0.0418662	0.337803	0.231998	0.663674	0.168493	0.513629	0.337803	0.828969	0.527089	1	0.744988	0.527089	0.231998	0.0325094	0.527089	0.903272	0.0302117	0.502254	0.516766	0.373796	0.527089	0.216405	0.168493	0.164832
peritoneal_liquid	0.591087	0.378398	2.48488e-05	0.811443	0.5791	0.405381	0.000104784	0.688112	0.597225	0.00118622	0.337614	0.217154	0.240256	0.12574	0.545923	0.337614	0.389098	0.405381	0.744988	1	0.405381	0.217154	0.0230189	0.405381	0.930309	0.0181298	0.17034	0.607132	0.426359	0.405381	0.0333785	0.12574	0.0154805
pharynx	0.755189	0.359201	0.12145	0.576999	1	NaN	0.140297	0.393534	0.540291	0.186441	1	1	0.256839	NaN	1	1	0.4795	NaN	0.527089	0.405381	NaN	1	NaN	NaN	0.475442	0.855132	0.275907	0.547733	0.543592	NaN	0.268631	NaN	0.197905
bedsore	0.641117	0.109486	0.00118754	0.287416	0.288844	1	0.00242081	0.162649	0.422996	0.00744656	1	1	0.0500715	0.605577	0.843669	1	0.117525	1	0.231998	0.217154	1	1	0.310494	1	0.269263	0.733701	0.0546299	0.428292	0.483927	1	0.0343606	0.605577	0.0137817
pleura_liquid	0.139854	0.0133654	0.000109188	0.0527506	0.0233422	NaN	0.000166744	0.0212243	0.0572239	0.000671168	0.256839	0.310494	0.00432501	NaN	0.19043	0.256839	0.00862942	NaN	0.0325094	0.0230189	NaN	0.310494	NaN	NaN	0.0441496	0.373982	0.00489645	0.0752609	0.073803	NaN	0.00386998	NaN	0.00100512
prostatic_material	0.755189	0.359201	0.12145	0.576999	1	NaN	0.140297	0.393534	0.540291	0.186441	1	1	0.256839	NaN	1	1	0.4795	NaN	0.527089	0.405381	NaN	1	NaN	NaN	0.475442	0.855132	0.275907	0.547733	0.543592	NaN	0.268631	NaN	0.197905
pus	0.549899	0.506329	3.09458e-05	1	0.691153	0.475442	8.08142e-05	0.914881	0.587498	0.0010493	0.388013	0.269263	0.443675	0.184836	0.575775	0.388013	0.540823	0.475442	0.903272	0.930309	0.475442	0.269263	0.0441496	0.475442	1	0.0300689	0.229007	0.508827	0.424239	0.475442	0.0286597	0.184836	0.0319431
rectal_tampon	0.248846	0.00456551	2.06569e-07	0.0496709	0.0448623	0.855132	3.2645e-07	0.00873125	0.0853202	4.68075e-06	0.593292	0.733701	0.00117976	0.59951	0.426326	0.593292	0.00854404	0.855132	0.0302117	0.0181298	0.855132	0.733701	0.373982	0.855132	0.0300689	1	0.000783894	0.0861318	0.104163	0.855132	0.000169456	0.59951	2.38089e-05
sputum	0.140574	0.68859	0.00035329	0.425811	1	0.275907	0.0021543	0.232177	0.0930072	0.0190836	0.103649	0.0546299	0.775145	0.0550522	0.208036	0.103649	1	0.275907	0.502254	0.17034	0.275907	0.0546299	0.00489645	0.275907	0.229007	0.000783894	1	0.056687	0.0339498	0.275907	0.262956	0.0550522	0.357408
surgical_wound	0.897146	0.189055	4.00675e-06	0.558389	0.488252	0.547733	1.15489e-05	0.352559	0.974123	0.000148895	0.576551	0.428292	0.140548	0.246932	0.794483	0.576551	0.308768	0.547733	0.516766	0.607132	0.547733	0.428292	0.0752609	0.547733	0.508827	0.0861318	0.056687	1	0.860893	0.547733	0.00694469	0.246932	0.00349138
ureter	1	0.118175	2.42474e-06	0.450794	0.347349	0.543592	6.48452e-06	0.242893	0.869179	0.000104485	0.651446	0.483927	0.0616802	0.243216	0.895058	0.651446	0.174098	0.543592	0.373796	0.426359	0.543592	0.483927	0.073803	0.543592	0.424239	0.104163	0.0339498	0.860893	1	0.543592	0.00478213	0.243216	0.00160028
urethra_secretion	0.755189	0.359201	0.12145	0.576999	1	NaN	0.140297	0.393534	0.540291	0.186441	1	1	0.256839	NaN	1	1	0.4795	NaN	0.527089	0.405381	NaN	1	NaN	NaN	0.475442	0.855132	0.275907	0.547733	0.543592	NaN	0.268631	NaN	0.197905
urine	0.060262	0.154062	0.00370379	0.162606	0.752824	0.268631	0.0878923	0.0226815	0.0277884	0.267869	0.0679081	0.0343606	0.235124	0.0534708	0.140011	0.0679081	0.639946	0.268631	0.216405	0.0333785	0.268631	0.0343606	0.00386998	0.268631	0.0286597	0.000169456	0.262956	0.00694469	0.00478213	0.268631	1	0.0534708	0.629747
vaginal_secretion	0.376759	0.0950234	0.00772707	0.217044	0.248213	NaN	0.0109127	0.123998	0.214542	0.0220422	0.563703	0.605577	0.0457458	NaN	0.504985	0.563703	0.0955807	NaN	0.168493	0.12574	NaN	0.605577	NaN	NaN	0.184836	0.59951	0.0550522	0.246932	0.243216	NaN	0.0534708	NaN	0.0255638
venous_catheter	0.0362425	0.173429	0.000414711	0.145541	0.667327	0.197905	0.0067327	0.0199649	0.00932441	0.0466897	0.0322278	0.0137817	0.183236	0.0255638	0.0801162	0.0322278	0.523421	0.197905	0.164832	0.0154805	0.197905	0.0137817	0.00100512	0.197905	0.0319431	2.38089e-05	0.357408	0.00349138	0.00160028	0.197905	0.629747	0.0255638	1

## Sheet: specimen_Shannon
	articular_liquid	ascites	bronchoaspirate	bile	biopsy	biopsy_from_lymph_node	blood	bronchus_lavage	catheter	catheter_urine	cavitary_liquid	cutaneous_lesion	drainage_liquid	exudate	feces	liquor	nasal_tampon	oral_tampon	Others	peritoneal_liquid	pharynx	bedsore	pleura_liquid	prostatic_material	pus	rectal_tampon	sputum	surgical_wound	ureter	urethra_secretion	urine	vaginal_secretion	venous_catheter
articular_liquid	1	0.280557	0.00150188	0.652468	0.576999	0.755189	0.00364627	0.426298	0.945753	0.0140785	0.792147	0.641117	0.236542	0.376759	1	0.792147	0.36131	0.755189	0.544827	0.666149	0.755189	0.641117	0.139854	0.755189	0.549899	0.248846	0.152676	0.897146	1	0.755189	0.079843	0.376759	0.0616406
ascites	0.280557	1	0.000569611	0.580937	1	0.359789	0.00414635	0.572585	0.207307	0.0317435	0.182103	0.109701	1	0.0953064	0.31728	0.182103	0.928673	0.359789	0.755515	0.278408	0.359789	0.109701	0.0134103	0.359789	0.534429	0.00457254	0.735091	0.189119	0.118229	0.359789	0.292921	0.0953064	0.380886
bronchoaspirate	0.00150188	0.000569611	1	0.0036589	0.198153	0.122827	0.0918622	7.07973e-06	7.75382e-05	0.0121221	0.00366064	0.00122092	0.00068058	0.00791096	0.0119951	0.00366064	0.0665066	0.122827	0.00598038	2.07932e-05	0.122827	0.00122092	0.000112775	0.122827	4.86193e-05	2.12539e-07	0.000309863	6.14092e-06	2.8348e-06	0.122827	0.000386729	0.00791096	0.00012573
bile	0.652468	0.580937	0.0036589	1	0.793346	0.576999	0.00841809	0.875477	0.698022	0.0379836	0.469456	0.339838	0.50117	0.217044	0.669815	0.469456	0.603848	0.576999	0.922756	0.962748	0.576999	0.339838	0.0527506	0.576999	0.970905	0.0629991	0.324812	0.646356	0.588048	0.576999	0.198767	0.217044	0.202094
biopsy	0.576999	1	0.198153	0.793346	NaN	1	0.354539	0.800542	0.423711	0.511022	0.414216	0.288844	1	0.248213	0.617075	0.414216	NaN	1	1	0.426777	1	0.288844	0.0233422	1	0.691153	0.0448623	1	0.488252	0.347349	1	0.844367	0.248213	0.832262
biopsy_from_lymph_node	0.755189	0.359789	0.122827	0.576999	1	NaN	0.14268	0.393534	0.540291	0.188063	1	1	0.273322	NaN	1	1	0.4795	NaN	0.527089	0.420297	NaN	1	NaN	NaN	0.475442	0.855132	0.281004	0.547733	0.543592	NaN	0.269807	NaN	0.203297
blood	0.00364627	0.00414635	0.0918622	0.00841809	0.354539	0.14268	1	2.99176e-05	0.000460368	0.286152	0.0083222	0.00283754	0.00520321	0.0113376	0.0260359	0.0083222	0.185841	0.14268	0.0195069	0.000125318	0.14268	0.00283754	0.000177452	0.14268	0.00023757	4.23225e-07	0.00464078	1.96334e-05	1.21829e-05	0.14268	0.0138472	0.0113376	0.00345499
bronchus_lavage	0.426298	0.572585	7.07973e-06	0.875477	0.800542	0.393534	2.99176e-05	1	0.349367	0.000942877	0.257191	0.162649	0.632806	0.123998	0.42144	0.257191	0.684102	0.393534	1	0.569748	0.393534	0.162649	0.0212243	0.393534	0.927008	0.00873125	0.263029	0.352559	0.249823	0.393534	0.0541547	0.123998	0.0700492
catheter	0.945753	0.207307	7.75382e-05	0.698022	0.423711	0.540291	0.000460368	0.349367	1	0.00324903	0.583882	0.422996	0.151893	0.214542	0.82916	0.583882	0.220671	0.540291	0.456057	0.825723	0.540291	0.422996	0.0572239	0.540291	0.587498	0.0853202	0.118703	0.974123	0.869179	0.540291	0.0404315	0.214542	0.0208982
catheter_urine	0.0140785	0.0317435	0.0121221	0.0379836	0.511022	0.188063	0.286152	0.000942877	0.00324903	1	0.0218045	0.00885344	0.0393781	0.0224762	0.0566968	0.0218045	0.343887	0.188063	0.065148	0.00232917	0.188063	0.00885344	0.000692964	0.188063	0.0034968	6.25053e-06	0.0506092	0.000346206	0.000248246	0.188063	0.143417	0.0224762	0.0672822
cavitary_liquid	0.792147	0.182103	0.00366064	0.469456	0.414216	1	0.0083222	0.257191	0.583882	0.0218045	1	1	0.119675	0.563703	1	1	0.187632	1	0.337803	0.418396	1	1	0.256839	1	0.388013	0.593292	0.116327	0.576551	0.651446	1	0.077714	0.563703	0.0438565
cutaneous_lesion	0.641117	0.109701	0.00122092	0.339838	0.288844	1	0.00283754	0.162649	0.422996	0.00885344	1	1	0.0641727	0.605577	0.843669	1	0.117525	1	0.231998	0.272827	1	1	0.310494	1	0.269263	0.733701	0.0616071	0.428292	0.483927	1	0.0393636	0.605577	0.0189234
drainage_liquid	0.236542	1	0.00068058	0.50117	1	0.273322	0.00520321	0.632806	0.151893	0.0393781	0.119675	0.0641727	1	0.0502103	0.240034	0.119675	0.897186	0.273322	0.777713	0.182058	0.273322	0.0641727	0.0046939	0.273322	0.496095	0.0015826	0.759759	0.169761	0.0900361	0.273322	0.352669	0.0502103	0.381014
exudate	0.376759	0.0953064	0.00791096	0.217044	0.248213	NaN	0.0113376	0.123998	0.214542	0.0224762	0.563703	0.605577	0.0502103	NaN	0.504985	0.563703	0.0955807	NaN	0.168493	0.134321	NaN	0.605577	NaN	NaN	0.184836	0.59951	0.0570447	0.246932	0.243216	NaN	0.0539931	NaN	0.0270827
feces	1	0.31728	0.0119951	0.669815	0.617075	1	0.0260359	0.42144	0.82916	0.0566968	1	0.843669	0.240034	0.504985	1	1	0.317311	1	0.513629	0.660727	1	0.843669	0.19043	1	0.575775	0.426326	0.231566	0.794483	0.895058	1	0.159898	0.504985	0.107514
liquor	0.792147	0.182103	0.00366064	0.469456	0.414216	1	0.0083222	0.257191	0.583882	0.0218045	1	1	0.119675	0.563703	1	1	0.187632	1	0.337803	0.418396	1	1	0.256839	1	0.388013	0.593292	0.116327	0.576551	0.651446	1	0.077714	0.563703	0.0438565
nasal_tampon	0.36131	0.928673	0.0665066	0.603848	NaN	0.4795	0.185841	0.684102	0.220671	0.343887	0.187632	0.117525	0.897186	0.0955807	0.317311	0.187632	NaN	0.4795	0.828969	0.237444	0.4795	0.117525	0.00862942	0.4795	0.540823	0.00854404	0.950274	0.308768	0.174098	0.4795	0.762742	0.0955807	0.739566
oral_tampon	0.755189	0.359789	0.122827	0.576999	1	NaN	0.14268	0.393534	0.540291	0.188063	1	1	0.273322	NaN	1	1	0.4795	NaN	0.527089	0.420297	NaN	1	NaN	NaN	0.475442	0.855132	0.281004	0.547733	0.543592	NaN	0.269807	NaN	0.203297
Others	0.544827	0.755515	0.00598038	0.922756	1	0.527089	0.0195069	1	0.456057	0.065148	0.337803	0.231998	0.777713	0.168493	0.513629	0.337803	0.828969	0.527089	1	0.59851	0.527089	0.231998	0.0325094	0.527089	0.903272	0.0302117	0.554765	0.516766	0.373796	0.527089	0.295028	0.168493	0.291068
peritoneal_liquid	0.666149	0.278408	2.07932e-05	0.962748	0.426777	0.420297	0.000125318	0.569748	0.825723	0.00232917	0.418396	0.272827	0.182058	0.134321	0.660727	0.418396	0.237444	0.420297	0.59851	1	0.420297	0.272827	0.0248082	0.420297	0.828207	0.0254738	0.14348	0.716035	0.590238	0.420297	0.0495401	0.134321	0.0258295
pharynx	0.755189	0.359789	0.122827	0.576999	1	NaN	0.14268	0.393534	0.540291	0.188063	1	1	0.273322	NaN	1	1	0.4795	NaN	0.527089	0.420297	NaN	1	NaN	NaN	0.475442	0.855132	0.281004	0.547733	0.543592	NaN	0.269807	NaN	0.203297
bedsore	0.641117	0.109701	0.00122092	0.339838	0.288844	1	0.00283754	0.162649	0.422996	0.00885344	1	1	0.0641727	0.605577	0.843669	1	0.117525	1	0.231998	0.272827	1	1	0.310494	1	0.269263	0.733701	0.0616071	0.428292	0.483927	1	0.0393636	0.605577	0.0189234
pleura_liquid	0.139854	0.0134103	0.000112775	0.0527506	0.0233422	NaN	0.000177452	0.0212243	0.0572239	0.000692964	0.256839	0.310494	0.0046939	NaN	0.19043	0.256839	0.00862942	NaN	0.0325094	0.0248082	NaN	0.310494	NaN	NaN	0.0441496	0.373982	0.00512215	0.0752609	0.073803	NaN	0.0039326	NaN	0.0010959
prostatic_material	0.755189	0.359789	0.122827	0.576999	1	NaN	0.14268	0.393534	0.540291	0.188063	1	1	0.273322	NaN	1	1	0.4795	NaN	0.527089	0.420297	NaN	1	NaN	NaN	0.475442	0.855132	0.281004	0.547733	0.543592	NaN	0.269807	NaN	0.203297
pus	0.549899	0.534429	4.86193e-05	0.970905	0.691153	0.475442	0.00023757	0.927008	0.587498	0.0034968	0.388013	0.269263	0.496095	0.184836	0.575775	0.388013	0.540823	0.475442	0.903272	0.828207	0.475442	0.269263	0.0441496	0.475442	1	0.0300689	0.277323	0.508827	0.424239	0.475442	0.0708225	0.184836	0.0900547
rectal_tampon	0.248846	0.00457254	2.12539e-07	0.0629991	0.0448623	0.855132	4.23225e-07	0.00873125	0.0853202	6.25053e-06	0.593292	0.733701	0.0015826	0.59951	0.426326	0.593292	0.00854404	0.855132	0.0302117	0.0254738	0.855132	0.733701	0.373982	0.855132	0.0300689	1	0.000934967	0.0861318	0.104163	0.855132	0.000213434	0.59951	3.97948e-05
sputum	0.152676	0.735091	0.000309863	0.324812	1	0.281004	0.00464078	0.263029	0.118703	0.0506092	0.116327	0.0616071	0.759759	0.0570447	0.231566	0.116327	0.950274	0.281004	0.554765	0.14348	0.281004	0.0616071	0.00512215	0.281004	0.277323	0.000934967	1	0.0649714	0.0472861	0.281004	0.496164	0.0570447	0.600657
surgical_wound	0.897146	0.189119	6.14092e-06	0.646356	0.488252	0.547733	1.96334e-05	0.352559	0.974123	0.000346206	0.576551	0.428292	0.169761	0.246932	0.794483	0.576551	0.308768	0.547733	0.516766	0.716035	0.547733	0.428292	0.0752609	0.547733	0.508827	0.0861318	0.0649714	1	0.860893	0.547733	0.0129501	0.246932	0.0105148
ureter	1	0.118229	2.8348e-06	0.588048	0.347349	0.543592	1.21829e-05	0.249823	0.869179	0.000248246	0.651446	0.483927	0.0900361	0.243216	0.895058	0.651446	0.174098	0.543592	0.373796	0.590238	0.543592	0.483927	0.073803	0.543592	0.424239	0.104163	0.0472861	0.860893	1	0.543592	0.009339	0.243216	0.00430046
urethra_secretion	0.755189	0.359789	0.122827	0.576999	1	NaN	0.14268	0.393534	0.540291	0.188063	1	1	0.273322	NaN	1	1	0.4795	NaN	0.527089	0.420297	NaN	1	NaN	NaN	0.475442	0.855132	0.281004	0.547733	0.543592	NaN	0.269807	NaN	0.203297
urine	0.079843	0.292921	0.000386729	0.198767	0.844367	0.269807	0.0138472	0.0541547	0.0404315	0.143417	0.077714	0.0393636	0.352669	0.0539931	0.159898	0.077714	0.762742	0.269807	0.295028	0.0495401	0.269807	0.0393636	0.0039326	0.269807	0.0708225	0.000213434	0.496164	0.0129501	0.009339	0.269807	1	0.0539931	0.78572
vaginal_secretion	0.376759	0.0953064	0.00791096	0.217044	0.248213	NaN	0.0113376	0.123998	0.214542	0.0224762	0.563703	0.605577	0.0502103	NaN	0.504985	0.563703	0.0955807	NaN	0.168493	0.134321	NaN	0.605577	NaN	NaN	0.184836	0.59951	0.0570447	0.246932	0.243216	NaN	0.0539931	NaN	0.0270827
venous_catheter	0.0616406	0.380886	0.00012573	0.202094	0.832262	0.203297	0.00345499	0.0700492	0.0208982	0.0672822	0.0438565	0.0189234	0.381014	0.0270827	0.107514	0.0438565	0.739566	0.203297	0.291068	0.0258295	0.203297	0.0189234	0.0010959	0.203297	0.0900547	3.97948e-05	0.600657	0.0105148	0.00430046	0.203297	0.78572	0.0270827	1

## Sheet: specimen_Simpson
	articular_liquid	ascites	bronchoaspirate	bile	biopsy	biopsy_from_lymph_node	blood	bronchus_lavage	catheter	catheter_urine	cavitary_liquid	cutaneous_lesion	drainage_liquid	exudate	feces	liquor	nasal_tampon	oral_tampon	Others	peritoneal_liquid	pharynx	bedsore	pleura_liquid	prostatic_material	pus	rectal_tampon	sputum	surgical_wound	ureter	urethra_secretion	urine	vaginal_secretion	venous_catheter
articular_liquid	1	0.280557	0.00150037	0.652468	0.576999	0.755189	0.00459254	0.426298	0.945753	0.0180276	0.792147	0.641117	0.236542	0.376759	1	0.792147	0.36131	0.755189	0.544827	0.666149	0.755189	0.641117	0.139854	0.755189	0.549899	0.248846	0.172686	0.897146	1	0.755189	0.113424	0.376759	0.0672965
ascites	0.280557	1	0.000569239	0.580937	1	0.359789	0.0069938	0.572585	0.207307	0.068495	0.182103	0.109701	1	0.0953064	0.31728	0.182103	0.928673	0.359789	0.755515	0.278408	0.359789	0.109701	0.0134103	0.359789	0.534429	0.00457254	0.795831	0.189119	0.118229	0.359789	0.572098	0.0953064	0.438178
bronchoaspirate	0.00150037	0.000569239	1	0.00365577	0.198084	0.12277	0.0905397	7.83056e-06	7.74474e-05	0.00637277	0.00365684	0.00121952	0.000679982	0.00790325	0.0119846	0.00365684	0.0664691	0.12277	0.00597529	2.37415e-05	0.12277	0.00121952	0.000112624	0.12277	5.3862e-05	2.12287e-07	0.000283252	6.13547e-06	3.21784e-06	0.12277	7.89786e-05	0.00790325	0.000102824
bile	0.652468	0.580937	0.00365577	1	0.793346	0.576999	0.0118541	0.875477	0.698022	0.0542534	0.469456	0.339838	0.50117	0.217044	0.669815	0.469456	0.603848	0.576999	0.922756	0.962748	0.576999	0.339838	0.0527506	0.576999	0.970905	0.0629991	0.393473	0.646356	0.588048	0.576999	0.298019	0.217044	0.231634
biopsy	0.576999	1	0.198084	0.793346	NaN	1	0.374489	0.800542	0.423711	0.561927	0.414216	0.288844	1	0.248213	0.617075	0.414216	NaN	1	1	0.426777	1	0.288844	0.0233422	1	0.691153	0.0448623	1	0.488252	0.347349	1	0.968675	0.248213	0.832164
biopsy_from_lymph_node	0.755189	0.359789	0.12277	0.576999	1	NaN	0.142377	0.393534	0.540291	0.188019	1	1	0.273322	NaN	1	1	0.4795	NaN	0.527089	0.420297	NaN	1	NaN	NaN	0.475442	0.855132	0.281004	0.547733	0.543592	NaN	0.269708	NaN	0.203028
blood	0.00459254	0.0069938	0.0905397	0.0118541	0.374489	0.142377	1	6.14555e-05	0.000542388	0.133074	0.00873962	0.00297369	0.00794604	0.0112829	0.0274039	0.00873962	0.203942	0.142377	0.0251965	0.000195803	0.142377	0.00297369	0.000176056	0.142377	0.000527419	4.56349e-07	0.00729606	3.39739e-05	1.96573e-05	0.142377	0.00248587	0.0112829	0.00256513
bronchus_lavage	0.426298	0.572585	7.83056e-06	0.875477	0.800542	0.393534	6.14555e-05	1	0.349367	0.00217424	0.257191	0.162649	0.632806	0.123998	0.42144	0.257191	0.684102	0.393534	1	0.569748	0.393534	0.162649	0.0212243	0.393534	0.927008	0.00873125	0.328282	0.352559	0.249823	0.393534	0.130126	0.123998	0.0852622
catheter	0.945753	0.207307	7.74474e-05	0.698022	0.423711	0.540291	0.000542388	0.349367	1	0.00440499	0.583882	0.422996	0.151893	0.214542	0.82916	0.583882	0.220671	0.540291	0.456057	0.825723	0.540291	0.422996	0.0572239	0.540291	0.587498	0.0853202	0.118703	0.974123	0.869179	0.540291	0.063685	0.214542	0.0208578
catheter_urine	0.0180276	0.068495	0.00637277	0.0542534	0.561927	0.188019	0.133074	0.00217424	0.00440499	1	0.0240494	0.00975152	0.0648966	0.0224643	0.0626035	0.0240494	0.401796	0.188019	0.086997	0.00395536	0.188019	0.00975152	0.000692363	0.188019	0.00982179	7.34252e-06	0.101437	0.000614372	0.000404933	0.188019	0.088434	0.0224643	0.0865751
cavitary_liquid	0.792147	0.182103	0.00365684	0.469456	0.414216	1	0.00873962	0.257191	0.583882	0.0240494	1	1	0.119675	0.563703	1	1	0.187632	1	0.337803	0.418396	1	1	0.256839	1	0.388013	0.593292	0.116327	0.576551	0.651446	1	0.0914694	0.563703	0.0437589
cutaneous_lesion	0.641117	0.109701	0.00121952	0.339838	0.288844	1	0.00297369	0.162649	0.422996	0.00975152	1	1	0.0641727	0.605577	0.843669	1	0.117525	1	0.231998	0.272827	1	1	0.310494	1	0.269263	0.733701	0.0616071	0.428292	0.483927	1	0.0463076	0.605577	0.0188724
drainage_liquid	0.236542	1	0.000679982	0.50117	1	0.273322	0.00794604	0.632806	0.151893	0.0648966	0.119675	0.0641727	1	0.0502103	0.240034	0.119675	0.897186	0.273322	0.777713	0.182058	0.273322	0.0641727	0.0046939	0.273322	0.496095	0.0015826	0.838459	0.169761	0.0900361	0.273322	0.586895	0.0502103	0.416131
exudate	0.376759	0.0953064	0.00790325	0.217044	0.248213	NaN	0.0112829	0.123998	0.214542	0.0224643	0.563703	0.605577	0.0502103	NaN	0.504985	0.563703	0.0955807	NaN	0.168493	0.134321	NaN	0.605577	NaN	NaN	0.184836	0.59951	0.0570447	0.246932	0.243216	NaN	0.0539489	NaN	0.0270055
feces	1	0.31728	0.0119846	0.669815	0.617075	1	0.0274039	0.42144	0.82916	0.0626035	1	0.843669	0.240034	0.504985	1	1	0.317311	1	0.513629	0.660727	1	0.843669	0.19043	1	0.575775	0.426326	0.231566	0.794483	0.895058	1	0.188033	0.504985	0.107338
liquor	0.792147	0.182103	0.00365684	0.469456	0.414216	1	0.00873962	0.257191	0.583882	0.0240494	1	1	0.119675	0.563703	1	1	0.187632	1	0.337803	0.418396	1	1	0.256839	1	0.388013	0.593292	0.116327	0.576551	0.651446	1	0.0914694	0.563703	0.0437589
nasal_tampon	0.36131	0.928673	0.0664691	0.603848	NaN	0.4795	0.203942	0.684102	0.220671	0.401796	0.187632	0.117525	0.897186	0.0955807	0.317311	0.187632	NaN	0.4795	0.828969	0.237444	0.4795	0.117525	0.00862942	0.4795	0.540823	0.00854404	0.950274	0.308768	0.174098	0.4795	0.934371	0.0955807	0.739429
oral_tampon	0.755189	0.359789	0.12277	0.576999	1	NaN	0.142377	0.393534	0.540291	0.188019	1	1	0.273322	NaN	1	1	0.4795	NaN	0.527089	0.420297	NaN	1	NaN	NaN	0.475442	0.855132	0.281004	0.547733	0.543592	NaN	0.269708	NaN	0.203028
Others	0.544827	0.755515	0.00597529	0.922756	1	0.527089	0.0251965	1	0.456057	0.086997	0.337803	0.231998	0.777713	0.168493	0.513629	0.337803	0.828969	0.527089	1	0.59851	0.527089	0.231998	0.0325094	0.527089	0.903272	0.0302117	0.605292	0.516766	0.373796	0.527089	0.427182	0.168493	0.311675
peritoneal_liquid	0.666149	0.278408	2.37415e-05	0.962748	0.426777	0.420297	0.000195803	0.569748	0.825723	0.00395536	0.418396	0.272827	0.182058	0.134321	0.660727	0.418396	0.237444	0.420297	0.59851	1	0.420297	0.272827	0.0248082	0.420297	0.828207	0.0254738	0.14348	0.716035	0.590238	0.420297	0.0819652	0.134321	0.0313294
pharynx	0.755189	0.359789	0.12277	0.576999	1	NaN	0.142377	0.393534	0.540291	0.188019	1	1	0.273322	NaN	1	1	0.4795	NaN	0.527089	0.420297	NaN	1	NaN	NaN	0.475442	0.855132	0.281004	0.547733	0.543592	NaN	0.269708	NaN	0.203028
bedsore	0.641117	0.109701	0.00121952	0.339838	0.288844	1	0.00297369	0.162649	0.422996	0.00975152	1	1	0.0641727	0.605577	0.843669	1	0.117525	1	0.231998	0.272827	1	1	0.310494	1	0.269263	0.733701	0.0616071	0.428292	0.483927	1	0.0463076	0.605577	0.0188724
pleura_liquid	0.139854	0.0134103	0.000112624	0.0527506	0.0233422	NaN	0.000176056	0.0212243	0.0572239	0.000692363	0.256839	0.310494	0.0046939	NaN	0.19043	0.256839	0.00862942	NaN	0.0325094	0.0248082	NaN	0.310494	NaN	NaN	0.0441496	0.373982	0.00512215	0.0752609	0.073803	NaN	0.00392728	NaN	0.00109121
prostatic_material	0.755189	0.359789	0.12277	0.576999	1	NaN	0.142377	0.393534	0.540291	0.188019	1	1	0.273322	NaN	1	1	0.4795	NaN	0.527089	0.420297	NaN	1	NaN	NaN	0.475442	0.855132	0.281004	0.547733	0.543592	NaN	0.269708	NaN	0.203028
pus	0.549899	0.534429	5.3862e-05	0.970905	0.691153	0.475442	0.000527419	0.927008	0.587498	0.00982179	0.388013	0.269263	0.496095	0.184836	0.575775	0.388013	0.540823	0.475442	0.903272	0.828207	0.475442	0.269263	0.0441496	0.475442	1	0.0300689	0.306568	0.508827	0.424239	0.475442	0.157515	0.184836	0.111234
rectal_tampon	0.248846	0.00457254	2.12287e-07	0.0629991	0.0448623	0.855132	4.56349e-07	0.00873125	0.0853202	7.34252e-06	0.593292	0.733701	0.0015826	0.59951	0.426326	0.593292	0.00854404	0.855132	0.0302117	0.0254738	0.855132	0.733701	0.373982	0.855132	0.0300689	1	0.000934967	0.0861318	0.104163	0.855132	0.000281374	0.59951	3.96477e-05
sputum	0.172686	0.795831	0.000283252	0.393473	1	0.281004	0.00729606	0.328282	0.118703	0.101437	0.116327	0.0616071	0.838459	0.0570447	0.231566	0.116327	0.950274	0.281004	0.605292	0.14348	0.281004	0.0616071	0.00512215	0.281004	0.306568	0.000934967	1	0.081859	0.0472861	0.281004	0.759691	0.0570447	0.586951
surgical_wound	0.897146	0.189119	6.13547e-06	0.646356	0.488252	0.547733	3.39739e-05	0.352559	0.974123	0.000614372	0.576551	0.428292	0.169761	0.246932	0.794483	0.576551	0.308768	0.547733	0.516766	0.716035	0.547733	0.428292	0.0752609	0.547733	0.508827	0.0861318	0.081859	1	0.860893	0.547733	0.0278718	0.246932	0.0126483
ureter	1	0.118229	3.21784e-06	0.588048	0.347349	0.543592	1.96573e-05	0.249823	0.869179	0.000404933	0.651446	0.483927	0.0900361	0.243216	0.895058	0.651446	0.174098	0.543592	0.373796	0.590238	0.543592	0.483927	0.073803	0.543592	0.424239	0.104163	0.0472861	0.860893	1	0.543592	0.016409	0.243216	0.00529771
urethra_secretion	0.755189	0.359789	0.12277	0.576999	1	NaN	0.142377	0.393534	0.540291	0.188019	1	1	0.273322	NaN	1	1	0.4795	NaN	0.527089	0.420297	NaN	1	NaN	NaN	0.475442	0.855132	0.281004	0.547733	0.543592	NaN	0.269708	NaN	0.203028
urine	0.113424	0.572098	7.89786e-05	0.298019	0.968675	0.269708	0.00248587	0.130126	0.063685	0.088434	0.0914694	0.0463076	0.586895	0.0539489	0.188033	0.0914694	0.934371	0.269708	0.427182	0.0819652	0.269708	0.0463076	0.00392728	0.269708	0.157515	0.000281374	0.759691	0.0278718	0.016409	0.269708	1	0.0539489	0.893935
vaginal_secretion	0.376759	0.0953064	0.00790325	0.217044	0.248213	NaN	0.0112829	0.123998	0.214542	0.0224643	0.563703	0.605577	0.0502103	NaN	0.504985	0.563703	0.0955807	NaN	0.168493	0.134321	NaN	0.605577	NaN	NaN	0.184836	0.59951	0.0570447	0.246932	0.243216	NaN	0.0539489	NaN	0.0270055
venous_catheter	0.0672965	0.438178	0.000102824	0.231634	0.832164	0.203028	0.00256513	0.0852622	0.0208578	0.0865751	0.0437589	0.0188724	0.416131	0.0270055	0.107338	0.0437589	0.739429	0.203028	0.311675	0.0313294	0.203028	0.0188724	0.00109121	0.203028	0.111234	3.96477e-05	0.586951	0.0126483	0.00529771	0.203028	0.893935	0.0270055	1
