# Supplementary material for: Profile of Bacterial Infections in COVID-19 Patients: Antimicrobial Resistance in the Time of SARS-CoV-2
Source: Biology (Basel). 2021 Aug 24;10(9):822. doi: 10.3390/biology10090822 (PMC8467430; doi:10.3390/biology10090822)
Supplement: Supplementary file 1 [file biology-10-00822-s001.zip › Supplementary_tableS5.xlsx]

## Sheet: README
Supplementary Table 5
Bacterial species isolated only from either COVID+ or COVID- patients.

## Sheet: Sheet1
species	group	n. of isolates	isolation source	clinical area	characteristics
Burkholderia cepacia	COVID+	1	bronchoaspirate	ICU	causes infections in immune compromised patients
Citrobacter braakii	COVID+	1	bronchoaspirate	ICU	causes infections in immune compromised patients
Corynebacterium renale	COVID+	1	venous catheter	ICU	usually associated with cattle infections
Corynebacterium spp.	COVID+	3	blood (2), venous catheter (1)	medicine (2), ICU (1)	various
Enterococcus avium	COVID+	1	pus	medicine	isolated from patients with endocarditis
Klebsiella ozaenae	COVID+	1	urine	medicine	frequent cause of nosocomial infections
Sphingomonas paucimobilis	COVID+	1	bronchoaspirate	ICU	frequent cause of nosocomial infections
Staphylococcus kloosii	COVID+	1	liquor	medicine	common cause of uncomplicated urinary tract infections
Achromobacter spp.	COVID-	7	Sputum (3), Blood (2), bronchoaspirate (1), catheter urine (1)	Medicine (4), Cardiology (1), ER (1), ICU (1)	various
Aeromonas caviae	COVID-	1	catheter urine	ER	causes infections in immune compromised patients
Cedecea davisae	COVID-	1	bronchoaspirate	ICU	rarely causes human infections
Chryseobacterium meningosepticum	COVID-	1	bronchoaspirate	ICU	causes infections in newborns and immune compromised patients
Citrobacter youngae	COVID-	2	bronchoaspirate, peritoneal liquid	Medicine, Surgery	rarely causes human infections
Clostridium novyi A	COVID-	1	blood	ICU	may cause severe clinical infections in humans
Corynebacterium jeikeium	COVID-	1	sputum	Medicine	frequent cause of human infections
Corynebacterium matruchotii	COVID-	3	bronchoaspirate (1), blood (1), sputum (1)	Medicine (2), ICU (1)	usually associated with animal infections
Corynebacterium urealyticum	COVID-	1	blood	ER	opportunistic nosocomial pathogen
Enterobacter amnigenus biogroup 2	COVID-	1	urine	cardiology	frequent cause of human infections
Enterobacter asburiae	COVID-	2	venous catheter, catheter	ER, Medicine	may cause severe clinical infections in humans
Enterobacter spp.	COVID-	1	blood	ER	various
Enterococcus casseliflavus/gallinarum	COVID-	1	blood	ICU	frequent cause of nosocomial infections
Enterococcus gallinarum	COVID-	1	blood	Medicine	frequent cause of nosocomial infections
Enterococcus hirae	COVID-	1	blood	cardiology	frequent cause of human infections
Enterococcus raffinosus	COVID-	1	venous catheter	ICU	frequent cause of human infections
Gemella morbillorum	COVID-	1	venous catheter	Medicine	rarely causes human infections
Hafnia alvei	COVID-	4	Sputum (2), bronchoaspirate (1), catheter urine (1)	Surgery (2), ICU (1), Medicine (1)	rarely causes human infections
Kluyvera ascorbata	COVID-	1	bronchoaspirate	Medicine	frequent cause of children infections
Moellerella wisconsensis	COVID-	1	bronchoaspirate	Medicine	rarely causes human infections
Mycobacterium tuberculosis complex	COVID-	2	bronchoaspirate (2)	Medicine (2)	frequent cause of human infections
Mycoplasma hominis	COVID-	1	vaginal secretion	Medicine	may cause infections
Neisseria meningitidis	COVID-	1	vaginal secretion	Medicine	may cause severe human infections
Pasteurella aerogenes	COVID-	1	catheter urine	ICU	rarely causes human infections
Proteus penneri	COVID-	1	bronchoaspirate	ICU	frequent cause of nosocomial infections
Proteus vulgaris/penneri	COVID-	1	urine	Medicine	frequent cause of nosocomial infections
Pseudomonas spp.	COVID-	1	bronchoaspirate	ICU	various
Pseudomonas stutzeri	COVID-	1	sputum	Medicine	may cause severe human infections
Serratia liquefaciens	COVID-	2	catheter urine, bronchial lavage	ER, surgery	frequent cause of community-acquired human infections
Serratia odorifera 1	COVID-	1	urine	ER	frequent cause of nosocomial infections
Staphylococcus capitis spp. ureolyticus	COVID-	1	venous catheter	Medicine	frequent cause of nosocomial infections
Staphylococcus coag negative	COVID-	5	Blood (3), surgical wound (2)	ER (3), Medicine (2)	various
Staphylococcus cohnii spp. urealyticum	COVID-	2	venous catheter, ascites	Medicine, Surgery	causes infections in immune compromised patients
Staphylococcus schleiferi	COVID-	2	blood, bronchoaspirate	ER, ICU	frequent cause of nosocomial infections
Staphylococcus schleiferi spp. schleiferi	COVID-	1	pus	Medicine	frequent cause of nosocomial infections
Staphylococcus xylosus	COVID-	2	blood, ascites	ICU, Medicine	may cause infections
Streptococcus agalactiae (Gr B)	COVID-	3	Urine (2), Surgical wound (1)	Medicine (2), ICU (1)	frequent cause of human infections
Streptococcus bovis I	COVID-	1	urine	ER	frequent cause of human infections
Streptococcus bovis II	COVID-	2	venous catheter, blood	ER, Medicine	frequent cause of human infections
Streptococcus constellatus	COVID-	1	pleura liquid	Surgery	frequent cause of human infections
Streptococcus cristatus	COVID-	1	venous catheter	Medicine	frequent cause of human infections
Streptococcus dysgalactiae spp. equisimilis	COVID-	3	Blood (2), Peritoneal_liquid (1)	Cardiology (1), ER (1), Surgery (1)	frequent cause of human infections
Streptococcus gordonii	COVID-	1	venous catheter	Medicine	frequent cause of human infections
Streptococcus intermedius	COVID-	1	sputum	Medicine	frequent cause of human infections
Streptococcus mitis group	COVID-	1	venous catheter	Medicine	frequent cause of human infections
Streptococcus oralis	COVID-	2	Blood (1), others (1)	ER (1), Medicine (1)	frequent cause of human infections
Streptococcus pneumoniae	COVID-	1	ascites	Surgery	frequent cause of human infections
Streptococcus pyogenes (Gr A)	COVID-	2	bronchoaspirate (2)	ICU (2)	may cause severe human infections
Veillonella	COVID-	1	blood	Surgery	frequent cause of human infections
