# Supplementary material for: Profile of Bacterial Infections in COVID-19 Patients: Antimicrobial Resistance in the Time of SARS-CoV-2
Source: Biology (Basel). 2021 Aug 24;10(9):822. doi: 10.3390/biology10090822 (PMC8467430; doi:10.3390/biology10090822)
Supplement: Supplementary file 1 [file biology-10-00822-s001.zip › Supplementary_tableS6.xlsx]

## Sheet: README
Supplementary Table 6
distribution of resistances and susceptibilities among isolates
sheet	Description
summary_of_susceptibilities	Antibiotic= name of the antibiotic; class= class of the antibiotic; ID=ID used in main figures and text ; n of tested isolates= total number of isolates tested against this antibiotic; I= number of isolates with Intermediate response to the antibiotic; R= number of isolates resistant to the antibiotic; S= number of isolates susceptible to the antibiotic; I%= percentage of isolates with intermedia…
Resistant_isolates	list and details of the isolates resistant to all the tested antibiotics

## Sheet: summary_of_susceptibilities
antibiotic	class	ID	n of tested isolates	I	R	S	I%	R%	S%
Amikacin	aminoglicoside	An	1023	61	89	873	6	8.7	85.3
Aztreonam	monobactam	Azt	404	65	114	225	16.1	28.2	55.7
Cefepime	beta lactam	Fep	1152	51	284	817	4.4	24.7	70.9
Cefotaxime	beta lactam	Ctx	1047	15	405	627	1.4	38.7	59.9
Ceftazidime	beta lactam	Caz	1150	53	311	786	4.6	27	68.3
Ceftriaxone	cephaloxporin	Cro	36		28	8	0	77.8	22.2
Imipenem	beta lactam	Ipm	1258	52	169	1037	4.1	13.4	82.4
Levofloxacin	third generation chinolon	Lvx	1328	12	478	838	0.9	36	63.1
Meropenem	beta lactam	Mem	1098	37	116	945	3.4	10.6	86.1
Norfloxacin		Nor	72	6	29	37	8.3	40.3	51.4
Piperacillin	beta lactam	Pip	619	7	309	303	1.1	49.9	48.9
Piperacillin-tazobactam	combination	Pta	1148	31	189	928	2.7	16.5	80.8
Tetracycline	tetracycline	Te	699	63	243	393	9	34.8	56.2
Trimethoprim/sulfamethoxazole	combination	Sxt	1761	42	708	1011	2.4	40.2	57.4
Gentamicin	aminoglicoside	Gm	1788	29	616	1143	1.6	34.5	63.9
Colistin	polipeptide	Cl	332		144	188	0	43.4	56.6
Ciprofloxacin	fluoroquinolone	Cip	1828	34	710	1084	1.9	38.8	59.3
Chloramphenicol	amphenicol	c	35		18	17	0	51.4	48.6

## Sheet: Resistant_isolates
Date	Month	Year	ward	COVID	Specimen	Microorganism	An	Azt	Fep	Ctx	Caz	Cro	Ipm	Lvx	Mem	Nor	Pip	Pta	Te	Sxt	Gm	Cl	Cip	c
2020-08-12	August	2020	Medicine	negative	sputum	ACHROMOBACTER SPECIES	R	R		R			R		R						R	R	R
2020-07-30	July	2020	ICU	negative	bronchoaspirate	ACINETOBACTER BAUMANNII	R						R	R	R					R	R		R
2020-08-11	August	2020	ICU	negative	bronchoaspirate	ACINETOBACTER BAUMANNII	R						R	R	R					R	R		R
2020-09-04	September	2020	Medicine	positive	blood	ACINETOBACTER BAUMANNII	R						R	R	R					R	R		R
2020-09-23	September	2020	Medicine	positive	urine	ACINETOBACTER BAUMANNII	R						R	R	R					R	R		R
2020-08-25	August	2020	Medicine	positive	urine	ACINETOBACTER BAUMANNII							R		R					R	R		R
2020-09-19	September	2020	ER	positive	catheter_urine	ACINETOBACTER BAUMANNII/CALCOACETICUS COMPLEX	R						R	R	R					R	R	R	R
2020-10-06	October	2020	Medicine	positive	urine	ACINETOBACTER BAUMANNII/HAEMOLYTICUS	R	R	R	R	R		R	R	R				R	R	R			R
2020-10-18	October	2020	Medicine	positive	urine	ACINETOBACTER BAUMANNII/HAEMOLYTICUS	R	R	R	R	R		R	R	R				R	R	R			R
2021-01-06	January	2021	ICU	positive	bronchoaspirate	ACINETOBACTER BAUMANNII/HAEMOLYTICUS	R	R		R			R	R	R					R	R		R
2021-01-18	January	2021	ICU	positive	bronchoaspirate	ACINETOBACTER BAUMANNII/HAEMOLYTICUS	R	R		R			R	R	R					R	R		R
2021-01-25	January	2021	ICU	positive	bronchoaspirate	ACINETOBACTER BAUMANNII/HAEMOLYTICUS	R	R		R			R	R	R					R	R		R
2021-01-08	January	2021	Medicine	positive	bronchoaspirate	ACINETOBACTER BAUMANNII/HAEMOLYTICUS	R	R		R			R	R	R					R	R		R
2020-12-31	December	2020	ICU	positive	bronchoaspirate	ACINETOBACTER BAUMANNII/HAEMOLYTICUS	R	R		R			R	R	R					R	R
2020-11-12	November	2020	Medicine	positive	bronchoaspirate	ACINETOBACTER BAUMANNII/HAEMOLYTICUS	R	R		R			R	R	R					R	R
2020-11-22	November	2020	Medicine	positive	blood	ACINETOBACTER BAUMANNII/HAEMOLYTICUS	R	R		R			R	R	R					R	R
2020-12-13	December	2020	ICU	positive	bronchoaspirate	BURKOLDERIA CEPACIA	R								R						R		R
2020-09-01	September	2020	ICU	positive	venous_catheter	CORYNEBACTERIUM RENALE													R
2020-12-02	December	2020	Medicine	positive	venous_catheter	CORYNEBACTERIUM SPP.															R		R
2020-09-07	September	2020	ICU	negative	bronchoaspirate	CORYNEBACTERIUM AMYCOLATUM													R				R
2020-09-21	September	2020	ICU	negative	bronchoaspirate	CORYNEBACTERIUM AMYCOLATUM													R				R
2020-08-28	August	2020	Medicine	positive	bronchoaspirate	CORYNEBACTERIUM AMYCOLATUM																	R
2020-08-12	August	2020	Medicine	negative	sputum	CORYNEBACTERIUM JEIKEIUM													R		R		R
2020-07-27	July	2020	Medicine	negative	blood	CORYNEBACTERIUM MATRUCHOTII													R		R		R
2020-09-17	September	2020	ICU	negative	bronchoaspirate	CORYNEBACTERIUM MATRUCHOTII													R				R
2020-09-18	September	2020	Medicine	negative	sputum	CORYNEBACTERIUM MATRUCHOTII													R				R
2020-10-21	October	2020	Medicine	positive	pus	ENTEROCOCCUS AVIUM													R
2020-09-25	September	2020	Medicine	negative	urine	ENTEROCOCCUS FAECALIS							R							R			R
2020-12-07	December	2020	ER	negative	ureter	ENTEROCOCCUS FAECALIS								R					R	R	R		R
2020-12-17	December	2020	ER	negative	catheter_urine	ENTEROCOCCUS FAECALIS								R					R	R	R		R
2021-01-04	January	2021	ER	negative	catheter_urine	ENTEROCOCCUS FAECALIS								R					R	R	R		R
2021-01-10	January	2021	ER	negative	urine	ENTEROCOCCUS FAECALIS								R					R	R	R		R
2020-12-07	December	2020	ICU	negative	catheter_urine	ENTEROCOCCUS FAECALIS								R					R	R	R		R
2021-01-07	January	2021	ICU	negative	catheter_urine	ENTEROCOCCUS FAECALIS								R					R	R	R		R
2020-12-21	December	2020	surgery	negative	urine	ENTEROCOCCUS FAECALIS								R					R	R	R		R
2020-10-14	October	2020	Medicine	negative	urine	ENTEROCOCCUS FAECALIS								R					R	R	R
2020-10-01	October	2020	Medicine	negative	urine	ENTEROCOCCUS FAECALIS								R					R	R	R
2020-09-30	September	2020	surgery	negative	urine	ENTEROCOCCUS FAECALIS								R					R	R	R
2020-10-27	October	2020	surgery	negative	urine	ENTEROCOCCUS FAECALIS								R					R	R	R
2020-11-23	November	2020	ICU	negative	bronchoaspirate	ENTEROCOCCUS FAECALIS													R	R	R
2021-01-16	January	2021	ICU	negative	venous_catheter	ENTEROCOCCUS FAECALIS													R	R	R
2021-01-18	January	2021	ICU	negative	bronchoaspirate	ENTEROCOCCUS FAECALIS													R	R	R
2021-01-19	January	2021	ICU	negative	blood	ENTEROCOCCUS FAECALIS													R	R	R
2020-11-27	November	2020	surgery	negative	ascites	ENTEROCOCCUS FAECALIS													R	R	R
2021-01-17	January	2021	surgery	negative	blood	ENTEROCOCCUS FAECALIS													R	R	R
2020-08-25	August	2020	Medicine	positive	urine	ENTEROCOCCUS FAECALIS							R							R			R
2020-11-23	November	2020	ICU	positive	catheter_urine	ENTEROCOCCUS FAECALIS								R					R	R	R		R
2020-12-10	December	2020	ICU	positive	catheter_urine	ENTEROCOCCUS FAECALIS								R					R	R	R		R
2020-12-17	December	2020	ICU	positive	catheter_urine	ENTEROCOCCUS FAECALIS								R					R	R	R		R
2020-12-24	December	2020	ICU	positive	catheter_urine	ENTEROCOCCUS FAECALIS								R					R	R	R		R
2020-12-28	December	2020	ICU	positive	catheter_urine	ENTEROCOCCUS FAECALIS								R					R	R	R		R
2021-01-05	January	2021	ICU	positive	urine	ENTEROCOCCUS FAECALIS								R					R	R	R		R
2021-01-07	January	2021	ICU	positive	catheter_urine	ENTEROCOCCUS FAECALIS								R					R	R	R		R
2020-12-15	December	2020	Medicine	positive	urine	ENTEROCOCCUS FAECALIS								R					R	R	R		R
2021-01-23	January	2021	Medicine	positive	catheter_urine	ENTEROCOCCUS FAECALIS								R					R	R	R		R
2020-11-17	November	2020	Medicine	positive	catheter_urine	ENTEROCOCCUS FAECALIS								R					R	R	R		R
2021-01-04	January	2021	Medicine	positive	urine	ENTEROCOCCUS FAECALIS								R					R	R	R		R
2021-01-04	January	2021	Medicine	positive	urine	ENTEROCOCCUS FAECALIS								R					R	R	R		R
2021-01-19	January	2021	Medicine	positive	urine	ENTEROCOCCUS FAECALIS								R					R	R	R		R
2020-12-21	December	2020	Medicine	positive	urine	ENTEROCOCCUS FAECALIS								R					R	R	R		R
2021-01-06	January	2021	Medicine	positive	catheter_urine	ENTEROCOCCUS FAECALIS								R					R	R	R		R
2020-12-29	December	2020	Medicine	positive	urine	ENTEROCOCCUS FAECALIS								R					R	R	R		R
2020-12-31	December	2020	Medicine	positive	urine	ENTEROCOCCUS FAECALIS								R					R	R	R		R
2021-01-03	January	2021	Medicine	positive	urine	ENTEROCOCCUS FAECALIS								R					R	R	R		R
2020-10-23	October	2020	ER	positive	urine	ENTEROCOCCUS FAECALIS								R					R	R	R
2020-10-29	October	2020	ICU	positive	catheter_urine	ENTEROCOCCUS FAECALIS								R					R	R	R
2020-11-19	November	2020	ICU	positive	venous_catheter	ENTEROCOCCUS FAECALIS													R	R	R
2020-12-06	December	2020	ICU	positive	venous_catheter	ENTEROCOCCUS FAECALIS													R	R	R
2020-12-31	December	2020	ICU	positive	bronchoaspirate	ENTEROCOCCUS FAECALIS													R	R	R
2020-12-31	December	2020	ICU	positive	venous_catheter	ENTEROCOCCUS FAECALIS													R	R	R
2021-01-03	January	2021	ICU	positive	venous_catheter	ENTEROCOCCUS FAECALIS													R	R	R
2021-01-21	January	2021	ICU	positive	venous_catheter	ENTEROCOCCUS FAECALIS													R	R	R
2020-10-28	October	2020	Medicine	positive	blood	ENTEROCOCCUS FAECALIS													R	R	R
2021-01-01	January	2021	Medicine	positive	blood	ENTEROCOCCUS FAECALIS													R	R	R
2020-11-22	November	2020	Medicine	positive	blood	ENTEROCOCCUS FAECALIS													R	R	R
2021-01-24	January	2021	surgery	positive	peritoneal_liquid	ENTEROCOCCUS FAECALIS													R	R	R
2020-07-17	July	2020	cardiology	negative	urine	ENTEROCOCCUS FAECIUM							R							R			R
2020-09-07	September	2020	ICU	negative	catheter_urine	ENTEROCOCCUS FAECIUM							R							R			R
2020-09-19	September	2020	ICU	negative	catheter_urine	ENTEROCOCCUS FAECIUM							R							R			R
2020-09-05	September	2020	Medicine	negative	catheter_urine	ENTEROCOCCUS FAECIUM							R							R			R
2020-07-19	July	2020	Medicine	negative	catheter_urine	ENTEROCOCCUS FAECIUM							R							R			R
2020-09-18	September	2020	Medicine	negative	urine	ENTEROCOCCUS FAECIUM							R							R			R
2020-07-18	July	2020	Medicine	negative	catheter_urine	ENTEROCOCCUS FAECIUM							R							R			R
2020-04-04	April	2020	Medicine	negative	urine	ENTEROCOCCUS FAECIUM							R							R			R
2020-05-03	May	2020	Medicine	negative	urine	ENTEROCOCCUS FAECIUM							R							R			R
2020-05-25	May	2020	Medicine	negative	urine	ENTEROCOCCUS FAECIUM							R							R			R
2020-07-30	July	2020	Medicine	negative	urine	ENTEROCOCCUS FAECIUM							R							R			R
2020-09-24	September	2020	Medicine	negative	urine	ENTEROCOCCUS FAECIUM							R							R			R
2020-09-22	September	2020	Medicine	negative	urine	ENTEROCOCCUS FAECIUM							R							R			R
2020-05-01	May	2020	Medicine	negative	catheter_urine	ENTEROCOCCUS FAECIUM							R							R			R
2020-09-06	September	2020	Medicine	negative	catheter_urine	ENTEROCOCCUS FAECIUM							R							R			R
2020-07-29	July	2020	surgery	negative	catheter_urine	ENTEROCOCCUS FAECIUM							R							R			R
2020-08-02	August	2020	ER	negative	pus	ENTEROCOCCUS FAECIUM							R							R
2020-04-20	April	2020	ICU	negative	blood	ENTEROCOCCUS FAECIUM							R							R
2020-07-22	July	2020	ICU	negative	pus	ENTEROCOCCUS FAECIUM							R							R
2020-07-29	July	2020	ICU	negative	blood	ENTEROCOCCUS FAECIUM							R							R
2020-08-12	August	2020	ICU	negative	surgical_wound	ENTEROCOCCUS FAECIUM							R							R
2020-08-13	August	2020	ICU	negative	blood	ENTEROCOCCUS FAECIUM							R							R
2020-07-06	July	2020	Medicine	negative	blood	ENTEROCOCCUS FAECIUM							R							R
2020-06-30	June	2020	Medicine	negative	bronchoaspirate	ENTEROCOCCUS FAECIUM							R							R
2020-07-27	July	2020	Medicine	negative	blood	ENTEROCOCCUS FAECIUM							R							R
2020-08-11	August	2020	Medicine	negative	blood	ENTEROCOCCUS FAECIUM							R							R
2020-04-05	April	2020	surgery	negative	ascites	ENTEROCOCCUS FAECIUM							R							R
2021-01-28	January	2021	ER	negative	urine	ENTEROCOCCUS FAECIUM								R					R	R	R		R
2021-01-08	January	2021	Medicine	negative	urine	ENTEROCOCCUS FAECIUM								R					R	R	R		R
2020-11-23	November	2020	surgery	negative	urine	ENTEROCOCCUS FAECIUM								R					R	R	R		R
2020-10-02	October	2020	Medicine	negative	catheter_urine	ENTEROCOCCUS FAECIUM								R					R	R	R
2021-01-20	January	2021	ICU	negative	venous_catheter	ENTEROCOCCUS FAECIUM													R	R	R
2020-12-22	December	2020	surgery	negative	drainage_liquid	ENTEROCOCCUS FAECIUM													R	R	R
2020-12-07	December	2020	ICU	positive	catheter_urine	ENTEROCOCCUS FAECIUM								R					R	R	R		R
2021-01-18	January	2021	ICU	positive	catheter_urine	ENTEROCOCCUS FAECIUM								R					R	R	R		R
2021-01-25	January	2021	ICU	positive	catheter_urine	ENTEROCOCCUS FAECIUM								R					R	R	R		R
2021-01-05	January	2021	Medicine	positive	catheter_urine	ENTEROCOCCUS FAECIUM								R					R	R	R		R
2020-11-30	November	2020	ICU	positive	venous_catheter	ENTEROCOCCUS FAECIUM													R	R	R
2020-12-26	December	2020	ICU	positive	venous_catheter	ENTEROCOCCUS FAECIUM													R	R	R
2021-01-05	January	2021	ICU	positive	venous_catheter	ENTEROCOCCUS FAECIUM													R	R	R
2020-10-13	October	2020	Medicine	positive	blood	ENTEROCOCCUS FAECIUM													R	R	R
2020-09-25	September	2020	Medicine	negative	urine	ENTEROCOCCUS SPECIES							R							R			R
2020-07-16	July	2020	ICU	negative	venous_catheter	ENTEROCOCCUS SPECIES														R
2020-12-26	December	2020	ICU	positive	urethra_secretion	ENTEROCOCCUS SPECIES													R
2021-01-16	January	2021	Medicine	positive	rectal_tampon	KLEBSIELLA PNEUMONIAE	R	R	R	R	R		R	R	R			R		R	R		R
2020-07-27	July	2020	ICU	negative	catheter_urine	KLEBSIELLA PNEUMONIAE SSP PNEUMONIAE	R		R	R	R	R	R	R	R		R	R		R	R		R
2020-09-28	September	2020	ICU	positive	rectal_tampon	KLEBSIELLA PNEUMONIAE SSP PNEUMONIAE	R		R	R	R		R	R	R		R	R		R	R		R
2020-04-23	April	2020	Medicine	positive	rectal_tampon	KLEBSIELLA PNEUMONIAE SSP PNEUMONIAE	R		R	R	R		R	R	R		R	R		R	R		R
2020-09-28	September	2020	Medicine	positive	urine	KLEBSIELLA PNEUMONIAE SSP PNEUMONIAE			R	R	R		R		R			R		R	R		R
2020-09-24	September	2020	Medicine	negative	vaginal_secretion	MYCOPLASMA HOMINIS								R					R				R
2020-12-23	December	2020	Medicine	negative	blood	PSEUDOMONAS AERUGINOSA	R		R	R	R		R	R	R		R	R			R	R	R
2020-10-12	October	2020	ICU	negative	surgical_wound	PSEUDOMONAS AERUGINOSA	R			R	R		R	R	R			R		R	R		R
2020-03-30	March	2020	ICU	negative	bronchoaspirate	PSEUDOMONAS AERUGINOSA	R		R		R		R	R	R		R	R			R		R
2020-06-30	June	2020	Medicine	negative	bronchoaspirate	PSEUDOMONAS AERUGINOSA	R		R		R		R	R	R		R	R			R		R
2020-04-22	April	2020	Medicine	negative	bronchoaspirate	PSEUDOMONAS AERUGINOSA	R		R		R		R	R	R		R	R			R		R
2020-12-21	December	2020	Medicine	positive	urine	PSEUDOMONAS AERUGINOSA	R		R	R	R		R	R	R		R	R			R	R	R
2020-12-27	December	2020	Medicine	positive	urine	PSEUDOMONAS AERUGINOSA	R		R	R	R		R	R				R			R	R	R
2020-05-04	May	2020	ICU	positive	bronchoaspirate	PSEUDOMONAS AERUGINOSA	R		R		R		R	R	R		R	R			R		R
2020-09-24	September	2020	ICU	negative	bronchoaspirate	PSEUDOMONAS PUTIDA	R		R		R		R	R	R		R	R			R		R
2020-10-21	October	2020	ICU	negative	blood	STAPHYLOCOCCUS AUREUS								R					R	R	R		R
2020-11-16	November	2020	Medicine	negative	bronchoaspirate	STAPHYLOCOCCUS AUREUS								R					R	R	R		R
2020-11-05	November	2020	Medicine	positive	urine	STAPHYLOCOCCUS AURICULARIS								R					R	R	R		R
2020-11-30	November	2020	surgery	negative	peritoneal_liquid	STAPHYLOCOCCUS COHNII SSP COHNII								R					R	R	R		R
2020-10-11	October	2020	Medicine	negative	venous_catheter	STAPHYLOCOCCUS EPIDERMIDIS								R						R	R		R
2020-06-25	June	2020	ICU	negative	bronchoaspirate	STAPHYLOCOCCUS EPIDERMIDIS													R	R	R		R
2020-09-07	September	2020	Medicine	negative	surgical_wound	STAPHYLOCOCCUS EPIDERMIDIS													R	R	R		R
2020-03-30	March	2020	Medicine	negative	blood	STAPHYLOCOCCUS EPIDERMIDIS													R	R	R		R
2020-05-01	May	2020	ICU	negative	blood	STAPHYLOCOCCUS EPIDERMIDIS														R	R		R
2020-05-09	May	2020	ICU	negative	blood	STAPHYLOCOCCUS EPIDERMIDIS														R	R		R
2020-11-24	November	2020	Medicine	positive	pus	STAPHYLOCOCCUS EPIDERMIDIS								R					R	R	R		R
2020-08-20	August	2020	ICU	positive	pus	STAPHYLOCOCCUS EPIDERMIDIS														R	R		R
2020-11-23	November	2020	cardiology	negative	blood	STAPHYLOCOCCUS HAEMOLYTICUS								R					R	R	R		R
2021-01-16	January	2021	ICU	negative	venous_catheter	STAPHYLOCOCCUS HAEMOLYTICUS								R					R	R	R		R
2020-12-05	December	2020	surgery	negative	drainage_liquid	STAPHYLOCOCCUS HAEMOLYTICUS								R					R	R	R		R
2020-11-14	November	2020	Medicine	negative	venous_catheter	STAPHYLOCOCCUS HAEMOLYTICUS								R						R	R		R
2020-07-06	July	2020	ER	negative	venous_catheter	STAPHYLOCOCCUS HAEMOLYTICUS													R	R	R		R
2020-07-17	July	2020	ER	negative	blood	STAPHYLOCOCCUS HAEMOLYTICUS													R	R	R		R
2020-07-21	July	2020	surgery	negative	bronchus_lavage	STAPHYLOCOCCUS HAEMOLYTICUS													R	R	R		R
2020-11-16	November	2020	Medicine	positive	blood	STAPHYLOCOCCUS HAEMOLYTICUS								R					R	R	R		R
2020-09-19	September	2020	ER	positive	catheter_urine	STAPHYLOCOCCUS HAEMOLYTICUS													R	R	R		R
2020-11-12	November	2020	ICU	positive	venous_catheter	STAPHYLOCOCCUS HOMINIS								R						R	R		R
2020-08-26	August	2020	ER	negative	pus	STAPHYLOCOCCUS INTERMEDIUS													R	R	R		R
2020-05-27	May	2020	Medicine	negative	venous_catheter	STAPHYLOCOCCUS INTERMEDIUS													R	R	R		R
2020-09-16	September	2020	surgery	negative	surgical_wound	STAPHYLOCOCCUS INTERMEDIUS													R	R	R		R
2020-10-04	October	2020	ICU	negative	surgical_wound	STREPTOCOCCUS AGALACTIAE (GR B)								R									R
2020-06-21	June	2020	Medicine	negative	urine	STREPTOCOCCUS AGALACTIAE (GR B)															R
2020-06-29	June	2020	Medicine	negative	surgical_wound	STREPTOCOCCUS ANGINOSUS															R
2020-10-28	October	2020	ER	positive	blood	STREPTOCOCCUS ANGINOSUS													R	R
2020-07-23	July	2020	Medicine	negative	sputum	STREPTOCOCCUS INTERMEDIUS			R	R					R
2020-04-16	April	2020	Medicine	negative	Others	STREPTOCOCCUS ORALIS			R	R					R
