# Supplementary material for: Profile of Bacterial Infections in COVID-19 Patients: Antimicrobial Resistance in the Time of SARS-CoV-2
Source: Biology (Basel). 2021 Aug 24;10(9):822. doi: 10.3390/biology10090822 (PMC8467430; doi:10.3390/biology10090822)
Supplement: Supplementary file 1 [file biology-10-00822-s001.zip › Supplementary_tableS7.xlsx]

## Sheet: README
Supplementary Table 7
Species isolated before and/or during the COVID-19 pandemic.
Sheet	description
shared_species	data relative to the bacterial species isolated both before and during the COVID-19
period-specific	data relative to the bacterial species isolated only either before or during the COVID-19
Column ID	description	notes
species	species of the strain
isolated before	number of strains belonging to the indicated species isolated before the COVID-19 pandemic
isolated during	number of strains belonging to the indicated species isolated during the COVID-19 pandemic from COVID+ and COVID- patients
isolated from COVID+	number of strains belonging to the indicated species isolated during the COVID-19 pandemic from COVID+ patients
isolated from COVID-	number of strains belonging to the indicated species isolated during the COVID-19 pandemic from COVID- patients
p.val pre_vs_during	Chi square test p.value, comparison of strains isolated before and during the COVID-19 pandemic	valid for shared species only
p.val pre_vs_COVID+	Chi square test p.value, comparison of strains isolated before and, during the COVID-19 pandemic, from COVID+ patients
p.val pre_vs_COVID-	Chi square test p.value, comparison of strains isolated before and, during the COVID-19 pandemic, from COVID- patients

## Sheet: shared_species
species	isolated before	isolated during	isolated from COVID+	isolated from COVID-	p.val pre_vs_during	p.val pre_vs_COVID+	p.val pre_vs_COVID-
Achromobacter spp	5	7	0	7	1	1	1
Acinetobacter baumannii	2	22	15	7	1	1	1
Acinetobacter baumannii/Calcoacetibus complex	3	2	1	1	1	1	1
Acinetobacter lwoffii	1	2	1	1	1	1	1
Burkholderia cepacia	1	1	1	0	1	1	1
Citrobacter braakii	1	1	1	0	1	1	1
Citrobacter freundii	1	12	1	11	1	1	1
Citrobacter koseri	4	18	6	12	1	1	1
Citrobacter youngae	1	2	0	2	1	1	1
Corynebacterium amycolatum	1	4	1	3	1	1	1
Corynebacterium jeikeium	6	1	0	1	1	1	1
Corynebacterium matruchotii	4	3	0	3	1	1	1
Corynebacterium urealyticum	3	1	0	1	1	1	1
Enterobacter aerogenes	11	33	10	23	1	1	1
Enterobacter cloacae	27	46	13	33	1	1	1
Enterococcus faecalis	101	184	63	121	0.630415	0.630415	0.630415
Enterococcus faecium	71	52	15	37	0.735323	0.735323	0.735323
Enterococcus raffinosus	4	1	0	1	1	1	1
Enterococcus spp	4	5	1	4	1	1	1
Escherichia coli	260	420	81	339	0.514783	0.514783	0.514783
Haemophilus influenzae	1	5	3	2	1	1	1
Hafnia alvei	2	4	0	4	1	1	1
Klebsiella oxytoca	15	37	16	21	1	1	1
Klebsiella pneumoniae	154	192	75	117	1	1	1
Morganella morganii	8	30	7	23	1	1	1
Pantoea agglomerans	2	2	1	1	1	1	1
Proteus mirabilis	56	86	17	69	1	1	1
Proteus vulgaris	4	3	1	2	1	1	1
Providencia rettgeri	1	3	1	2	1	1	1
Providencia stuartii	4	4	2	2	1	1	1
Pseudomonas aeruginosa	70	187	62	125	0.272012	0.272012	0.272012
Pseudomonas putida	6	5	2	3	1	1	1
Pseudomonas spp	2	1	0	1	1	1	1
Pseudomonas stutzeri	2	1	0	1	1	1	1
Salmonella spp	1	3	1	2	1	1	1
Serratia liquefaciens	1	2	0	2	1	1	1
Serratia marcescens	5	28	10	18	0.948697	0.948697	0.948697
Stphylococcus aureus	118	134	33	101	1	1	1
Staphylococcus auricularis	2	6	3	3	1	1	1
Staphylococcus capitis	51	28	10	18	0.699385	0.699385	0.699385
Staphylococcus coag negative	10	5	0	5	1	1	1
Staphylococcus cohnii spp cohnii	2	4	1	3	1	1	1
Staphylococcus epidermidis	239	175	59	116	0.242795	0.242795	0.242795
Staphylococcus haemolyticus	58	59	18	41	1	1	1
Staphylococcus hominis	150	60	9	51	0.109306	0.109306	0.109306
Staphylococcus intermedius	3	7	1	6	1	1	1
Staphylococcus schleiferi	3	2	0	2	1	1	1
Staphylococcus warneri	5	2	1	1	1	1	1
Staphylococcus xylosus	7	2	0	2	1	1	1
Stenotrophomonas malthophilia	8	25	8	17	1	1	1
Streptococcus agalactiae (gr B)	2	3	0	3	1	1	1
Streptococcus anginosus	3	5	1	4	1	1	1
Streptococcus bovis I	4	1	0	1	1	1	1
Streptococcus bovis II	4	2	0	2	1	1	1
Streptococcus constellatus	2	1	0	1	1	1	1
Streptococcus gordonii	1	1	0	1	1	1	1
Streptococcus mitis	2	2	1	1	1	1	1
Streptococcus mitis group	2	1	0	1	1	1	1
Streptococcus oralis	5	2	0	2	1	1	1
Streptococcus pneumoniae	6	1	0	1	1	1	1
Streptococcus pyogenes (gr A)	4	2	0	2	1	1	1

## Sheet: period-specific
species	isolated before	isolated during	isolated from COVID+	isolated from COVID-
Actinomyces israelii	1	0	0	0
Aeromonas spp.	1	0	0	0
Agrobacterium radiobacter	1	0	0	0
Alcaligenes faecalis	1	0	0	0
Anaerobiospirillum spp.	1	0	0	0
Bacteroides fragilis	2	0	0	0
Citrobacter amalonaticus	1	0	0	0
Corynebacterium amycolatum/minitissimum	1	0	0	0
Klebsiella pneumoniae spp. ozaenae	3	0	0	0
Lactobacillus spp.	1	0	0	0
Leclercia adenocarboxylata	1	0	0	0
Listeria monocytogenes	4	0	0	0
Listeria spp.	1	0	0	0
Neisseria cinerea	1	0	0	0
Ochrobactrum anthropi	1	0	0	0
Pseudomonas luteola	1	0	0	0
Serratia fonticola	1	0	0	0
Shigella dysenteriae	2	0	0	0
Staphylococcus caprae	4	0	0	0
Staphylococcus gallinarum	2	0	0	0
Staphylococcus lentus	1	0	0	0
Staphylococcus saprophyticus	5	0	0	0
Streptococcus dysgalactiae (Gr C)	2	0	0	0
Streptococcus gr C	2	0	0	0
Streptococcus parasanguinis	1	0	0	0
Streptococcus salivarius	2	0	0	0
Streptococcus sanguis	1	0	0	0
Streptococcus sobrinus	2	0	0	0
Aeromonas caviae	0	1	1	0
Cedecea davisae	0	1	1	0
Chryseobacterium meningosepticum	0	1	1	0
Citrobacter farmeri	0	6	2	4
Clostridium novyi A	0	1	1	0
Corynebacterium renale	0	1	1	0
Corynebacterium spp.	0	3	2	1
Enterobacter amnigenus biogroup 2	0	1	1	0
Enterobacter asburiae	0	2	2	0
Enterobacter spp.	0	1	1	0
Enterococcus avium	0	1	1	0
Enterococcus casseliflavus/gallinarum	0	1	1	0
Enterococcus gallinarum	0	1	1	0
Enterococcus hirae	0	1	1	0
Gemella morbillorum	0	1	1	0
Klebsiella ozaenae	0	1	1	0
Kluyvera ascorbata	0	1	1	0
Moellerella wisconsensis	0	1	1	0
Mycobacterium tuberculosis complex	0	1	1	0
Mycoplasma hominis	0	1	1	0
Neisseria meningitidis	0	1	1	0
Pasteuerlla aerogenes	0	1	1	0
Proteus penneri	0	1	1	0
Proteus vulgaris/penneri	0	1	1	0
Serratia odorifera 1	0	1	1	0
Serratia plymuthica	0	2	1	1
Sphingomonas paucimobilis	0	1	1	0
Staphylococcus capitis spp. Uerolyticus	0	1	0	1
Staphylococcus cohnii spp. urealyticum	0	2	2	0
Staphylococcus kloosii	0	1	1	0
Staphylococcus lugdunensis	0	7	1	6
Staphylococus schleiferi spp. Schleiferi	0	1	1	0
Staphylococcus sciuri	0	3	1	2
Staphylococcus simulans	0	3	1	2
Streptococcus cristatus	0	1	1	0
Streptococcus dysgalactiae spp. equisimilis	0	3	3	0
Streptococcus intermedius	0	1	1	0
Veillonella	0	1	1	0
